# Supplementary material for: Bifunctional Anti-Non-Amyloid Component α-Synuclein Nanobodies Are Protective In Situ
Source: PubMed Central journal article supplement (PMC5100967; doi:10.1371/journal.pone.0165964), 2016-11-08
Supplement: pone.0165964.s003.pdf [file pone.0165964.s003.pdf]

| Sample # | Treatment                                                         |
|----------|-------------------------------------------------------------------|
| 9        | ST14A Transfection control                                        |
| 10       | ST14A Transfection control                                        |
| 11       | ST14A Transfection control                                        |
| 12       | Empty Vector Control-pAAV/ GFP-pcDNA3.1-                          |
| 13       | Empty Vector Control-pAAV/ GFP-pcDNA3.1--                         |
| 14       | Empty Vector Control-pAAV/ GFP-pcDNA3.1-                          |
| 18       | Empty Vector Control-pAAV /Syn~GFP-pcDNA3.1-                      |
| 19       | Empty Vector Control-pAAV /Syn~GFP-pcDNA3.1-                      |
| 20       | Empty Vector Control-pAAV /Syn~GFP-pcDNA3.1-                      |
| 21       | Syn87PEST-pAAV /Syn~GFP-pcDNA3.1-                                 |
| 22       | Syn87PEST-pAAV /Syn~GFP-pcDNA3.1-                                 |
| 23       | Syn87PEST-pAAV /Syn~GFP-pcDNA3.1-                                 |
| 24       | Vh14PEST-pAAV / Syn~GFP-pcDNA3.1-                                 |
| 25       | Vh14PEST-pAAV / Syn~GFP-pcDNA3.1-                                 |
| 26       | Vh14PEST-pAAV / Syn~GFP-pcDNA3.1-                                 |
| 27       | Empty Vector Control-pAAV /Syn-pcDNA3.1-/mhttex1-72QGFP-pcDNA3.1- |
| 28       | Empty Vector Control-pAAV /Syn-pcDNA3.1-/mhttex1-72QGFP-pcDNA3.1- |
| 29       | Empty Vector Control-pAAV /Syn-pcDNA3.1-/mhttex1-72QGFP-pcDNA3.1- |
| 30       | Syn87PEST-pAAV /Syn-pcDNA3.1-/mhttex1-72QGFP-pcDNA3.1-            |
| 31       | Syn87PEST-pAAV /Syn-pcDNA3.1-/mhttex1-72QGFP-pcDNA3.1-            |
| 32       | Syn87PEST-pAAV /Syn-pcDNA3.1-/mhttex1-72QGFP-pcDNA3.1-            |
| 33       | Vh14PEST-pAAV /Syn-pcDNA3.1-/mhttex1-72QGFP-pcDNA3.1-             |
| 34       | Vh14PEST-pAAV /Syn-pcDNA3.1-/mhttex1-72QGFP-pcDNA3.1-             |
| 35       | Vh14PEST-pAAV /Syn-pcDNA3.1-/mhttex1-72QGFP-pcDNA3.1-             |

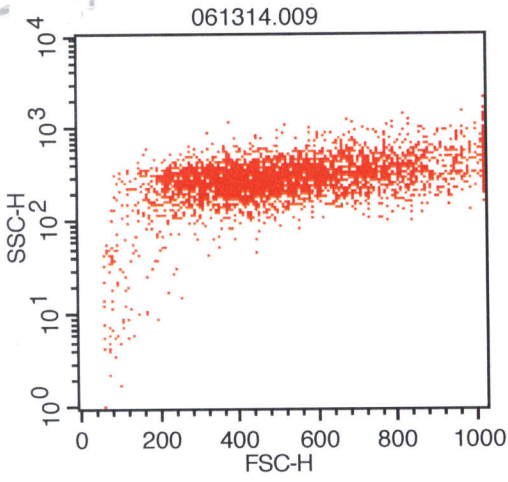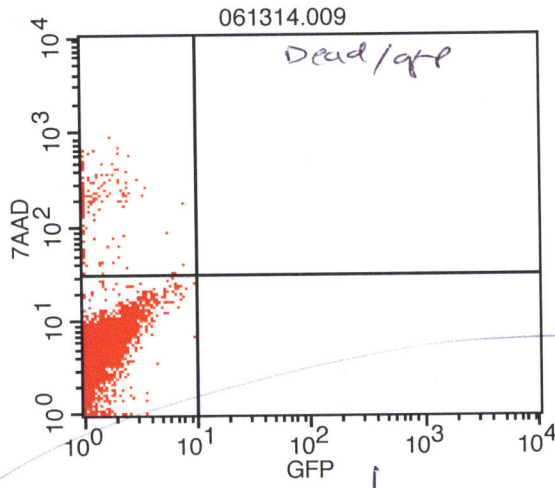

File: 061314.009  
 Sample ID:  
 Acquisition Date: 13-Jun-14  
 Gated Events: 20000  
 X Parameter: FSC-H (Linear)

| Region | Events | % Gated | % Total |
|--------|--------|---------|---------|
| R2     | 2      | 0.01    |         |

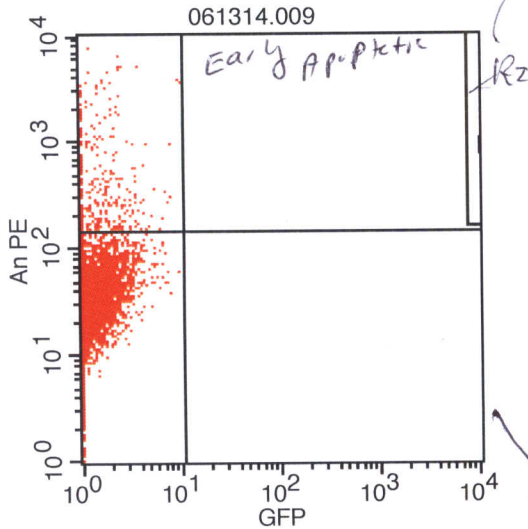

File: 061314.009  
 Sample ID:  
 Acquisition Date: 13-Jun-14  
 Gated Events: 19998  
 X Parameter: GFP (Log)  
 Quad Location: 10, 30

Log Data Units: Linear Values  
 Patient ID:  
 Gate: G1  
 Total Events: 20000  
 Y Parameter: 7AAD (Log)

| Quad | Events | % Gated | % Total | X Mean | X Geo Mean | Y Mean | Y Geo Mean |
|------|--------|---------|---------|--------|------------|--------|------------|
| UL   | 771    | 3.86    | 3.85    | 1.61   | 1.40       | 255.84 | 196.06     |
| UR   | 16     | 0.08    | 0.08    | 22.01  | 17.97      | 135.48 | 70.49      |
| LL   | 19205  | 96.03   | 96.03   | 1.53   | 1.41       | 5.66   | 4.70       |
| LR   | 6      | 0.03    | 0.03    | 616.36 | 60.16      | 10.15  | 4.51       |

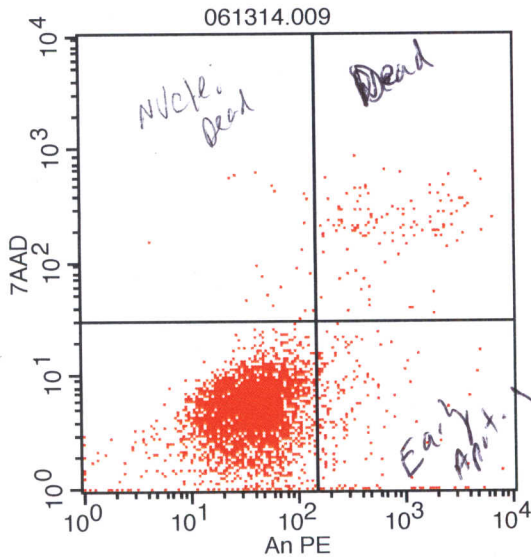

File: 061314.009  
 Sample ID:  
 Acquisition Date: 13-Jun-14  
 Gated Events: 19998  
 X Parameter: GFP (Log)  
 Quad Location: 11, 145

Log Data Units: Linear Values  
 Patient ID:  
 Gate: G1  
 Total Events: 20000  
 Y Parameter: An PE (Log)

| Quad | Events | % Gated | % Total | X Mean | X Geo Mean | Y Mean  | Y Geo Mean |
|------|--------|---------|---------|--------|------------|---------|------------|
| UL   | 1533   | 7.67    | 7.66    | 1.88   | 1.62       | 879.82  | 477.00     |
| UR   | 10     | 0.05    | 0.05    | 27.91  | 22.83      | 1094.34 | 708.58     |
| LL   | 18446  | 92.24   | 92.23   | 1.50   | 1.40       | 42.12   | 33.93      |
| LR   | 9      | 0.05    | 0.04    | 415.65 | 37.33      | 57.64   | 35.05      |

File: 061314.009  
 Sample ID:  
 Acquisition Date: 13-Jun-14  
 Gated Events: 19998  
 X Parameter: An PE (Log)  
 Quad Location: 149, 30

Log Data Units: Linear Values  
 Patient ID:  
 Gate: G1  
 Total Events: 20000  
 Y Parameter: 7AAD (Log)

| Quad | Events | % Gated | % Total | X Mean  | X Geo Mean | Y Mean | Y Geo Mean |
|------|--------|---------|---------|---------|------------|--------|------------|
| UL   | 137    | 0.69    | 0.69    | 83.17   | 68.66      | 197.92 | 128.87     |
| UR   | 647    | 3.24    | 3.23    | 1280.75 | 786.10     | 266.18 | 210.75     |
| LL   | 18359  | 91.80   | 91.80   | 42.06   | 33.86      | 5.60   | 4.72       |
| LR   | 855    | 4.28    | 4.28    | 614.08  | 347.43     | 6.93   | 4.38       |

ST14A

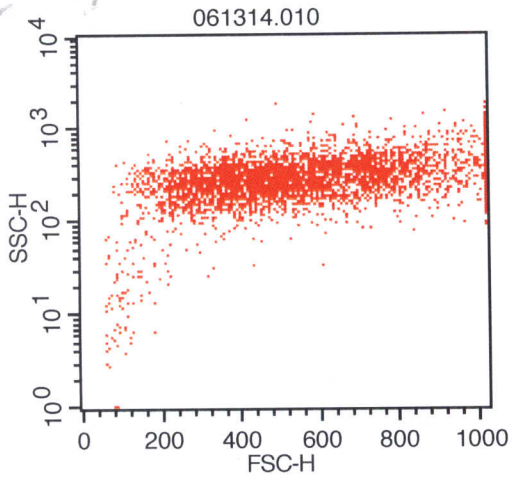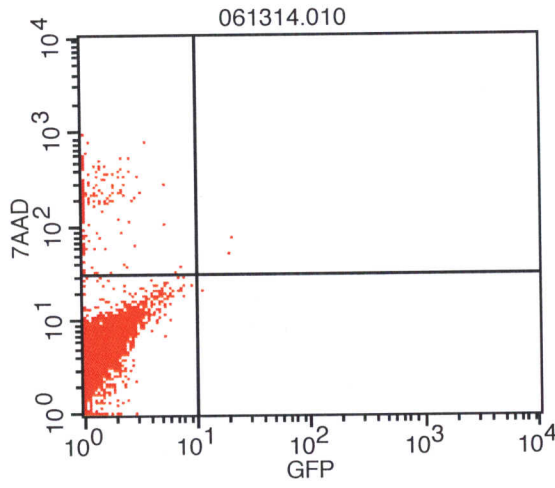

File: 061314.010  
 Sample ID:  
 Acquisition Date: 13-Jun-14  
 Gated Events: 20000  
 X Parameter: FSC-H (Linear)

| Region | Events | % Gated | % Total |
|--------|--------|---------|---------|
| R2     | 0      | 0.00    |         |

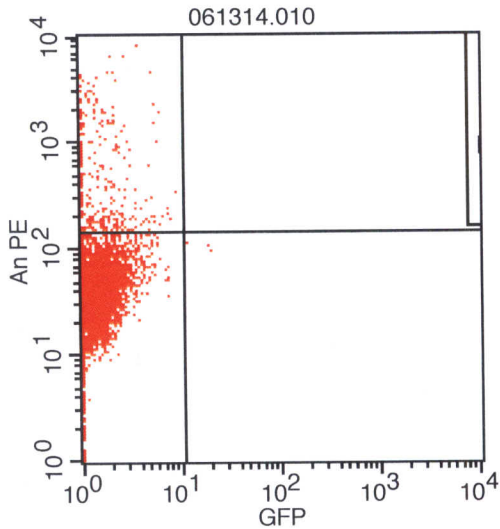

File: 061314.010  
 Sample ID:  
 Acquisition Date: 13-Jun-14  
 Gated Events: 20000  
 X Parameter: GFP (Log)  
 Quad Location: 10, 30

Log Data Units: Linear Values  
 Patient ID:  
 Gate: G1  
 Total Events: 20000  
 Y Parameter: 7AAD (Log)

| Quad | Events | % Gated | % Total | X Mean | X Geo Mean | Y Mean | Y Geo Mean |
|------|--------|---------|---------|--------|------------|--------|------------|
| UL   | 751    | 3.75    | 3.75    | 1.69   | 1.43       | 239.80 | 180.13     |
| UR   | 19     | 0.10    | 0.10    | 59.71  | 22.55      | 220.25 | 87.25      |
| LL   | 19223  | 96.11   | 96.11   | 1.53   | 1.41       | 5.79   | 4.80       |
| LR   | 7      | 0.03    | 0.03    | 12.43  | 12.27      | 23.73  | 22.58      |

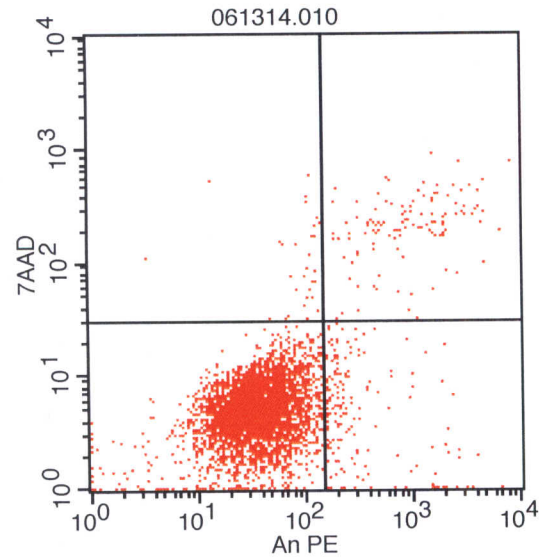

File: 061314.010  
 Sample ID:  
 Acquisition Date: 13-Jun-14  
 Gated Events: 20000  
 X Parameter: GFP (Log)  
 Quad Location: 11, 145

Log Data Units: Linear Values  
 Patient ID:  
 Gate: G1  
 Total Events: 20000  
 Y Parameter: An PE (Log)

| Quad | Events | % Gated | % Total | X Mean | X Geo Mean | Y Mean | Y Geo Mean |
|------|--------|---------|---------|--------|------------|--------|------------|
| UL   | 1547   | 7.74    | 7.74    | 1.96   | 1.66       | 915.32 | 485.34     |
| UR   | 9      | 0.04    | 0.04    | 105.57 | 32.75      | 893.16 | 462.77     |
| LL   | 18432  | 92.16   | 92.16   | 1.50   | 1.39       | 42.96  | 34.73      |
| LR   | 12     | 0.06    | 0.06    | 18.31  | 16.55      | 100.29 | 96.76      |

File: 061314.010  
 Sample ID:  
 Acquisition Date: 13-Jun-14  
 Gated Events: 20000  
 X Parameter: An PE (Log)  
 Quad Location: 149, 30

Log Data Units: Linear Values  
 Patient ID:  
 Gate: G1  
 Total Events: 20000  
 Y Parameter: 7AAD (Log)

| Quad | Events | % Gated | % Total | X Mean  | X Geo Mean | Y Mean | Y Geo Mean |
|------|--------|---------|---------|---------|------------|--------|------------|
| UL   | 127    | 0.64    | 0.64    | 78.34   | 58.00      | 179.76 | 112.05     |
| UR   | 638    | 3.19    | 3.19    | 1411.17 | 881.40     | 252.81 | 196.49     |
| LL   | 18368  | 91.84   | 91.84   | 43.04   | 34.77      | 5.72   | 4.80       |
| LR   | 867    | 4.33    | 4.33    | 595.40  | 335.45     | 7.60   | 4.92       |



STIYA

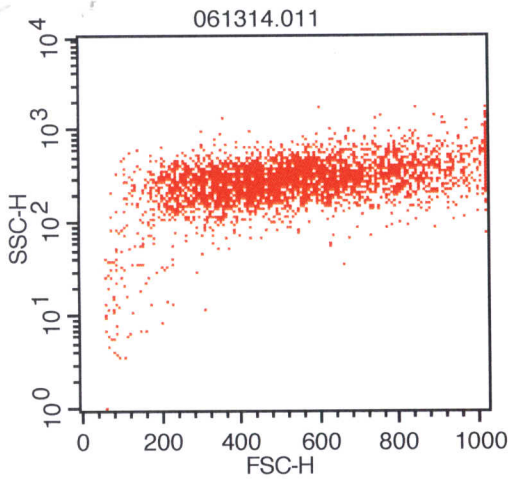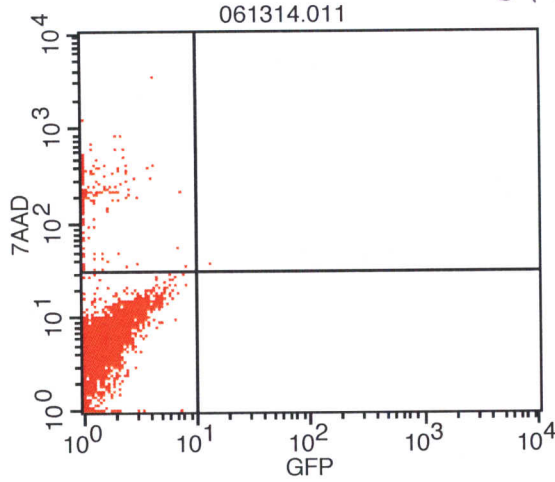

File: 061314.011  
 Sample ID:  
 Acquisition Date: 13-Jun-14  
 Gated Events: 20000  
 X Parameter: FSC-H (Linear)

| Region | Events | % Gated | % Total |
|--------|--------|---------|---------|
| R2     | 0      | 0.00    |         |

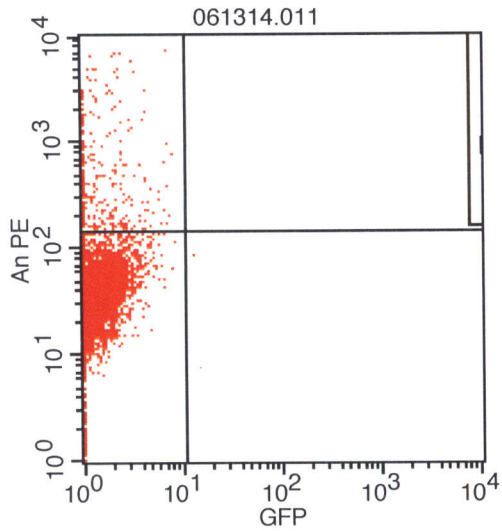

File: 061314.011  
 Sample ID:  
 Acquisition Date: 13-Jun-14  
 Gated Events: 20000  
 X Parameter: GFP (Log)  
 Quad Location: 10, 30

Log Data Units: Linear Values  
 Patient ID:  
 Gate: G1  
 Total Events: 20000  
 Y Parameter: 7AAD (Log)

| Quad | Events | % Gated | % Total | X Mean | X Geo Mean | Y Mean | Y Geo Mean |
|------|--------|---------|---------|--------|------------|--------|------------|
| UL   | 810    | 4.05    | 4.05    | 1.59   | 1.39       | 256.00 | 193.71     |
| UR   | 16     | 0.08    | 0.08    | 26.10  | 17.63      | 95.42  | 63.46      |
| LL   | 19171  | 95.86   | 95.86   | 1.53   | 1.42       | 5.75   | 4.80       |
| LR   | 3      | 0.01    | 0.01    | 11.49  | 11.48      | 27.49  | 27.47      |

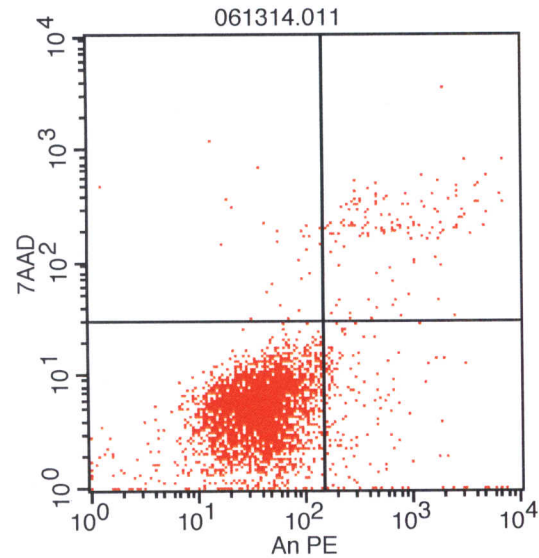

File: 061314.011  
 Sample ID:  
 Acquisition Date: 13-Jun-14  
 Gated Events: 20000  
 X Parameter: GFP (Log)  
 Quad Location: 11, 145

Log Data Units: Linear Values  
 Patient ID:  
 Gate: G1  
 Total Events: 20000  
 Y Parameter: An PE (Log)

| Quad | Events | % Gated | % Total | X Mean | X Geo Mean | Y Mean | Y Geo Mean |
|------|--------|---------|---------|--------|------------|--------|------------|
| UL   | 1499   | 7.50    | 7.50    | 1.84   | 1.59       | 845.11 | 447.37     |
| UR   | 11     | 0.06    | 0.06    | 32.30  | 20.72      | 953.86 | 573.49     |
| LL   | 18482  | 92.41   | 92.41   | 1.51   | 1.40       | 42.45  | 34.38      |
| LR   | 8      | 0.04    | 0.04    | 12.10  | 12.02      | 78.61  | 77.74      |

File: 061314.011  
 Sample ID:  
 Acquisition Date: 13-Jun-14  
 Gated Events: 20000  
 X Parameter: An PE (Log)  
 Quad Location: 149, 30

Log Data Units: Linear Values  
 Patient ID:  
 Gate: G1  
 Total Events: 20000  
 Y Parameter: 7AAD (Log)

| Quad | Events | % Gated | % Total | X Mean  | X Geo Mean | Y Mean | Y Geo Mean |
|------|--------|---------|---------|---------|------------|--------|------------|
| UL   | 165    | 0.83    | 0.83    | 80.90   | 65.92      | 168.11 | 113.56     |
| UR   | 660    | 3.30    | 3.30    | 1240.33 | 713.88     | 274.42 | 216.08     |
| LL   | 18378  | 91.89   | 91.89   | 42.43   | 34.33      | 5.69   | 4.80       |
| LR   | 797    | 3.98    | 3.98    | 565.72  | 328.22     | 7.22   | 4.70       |



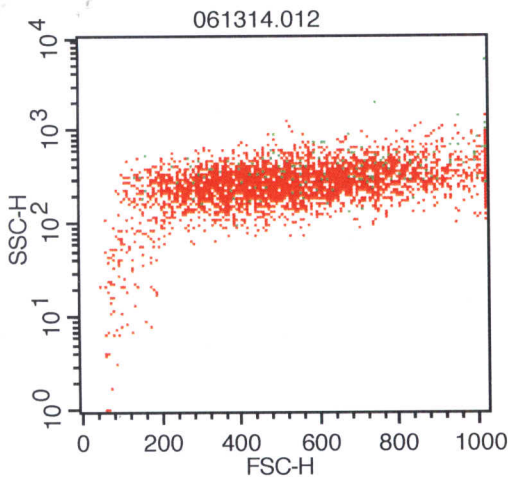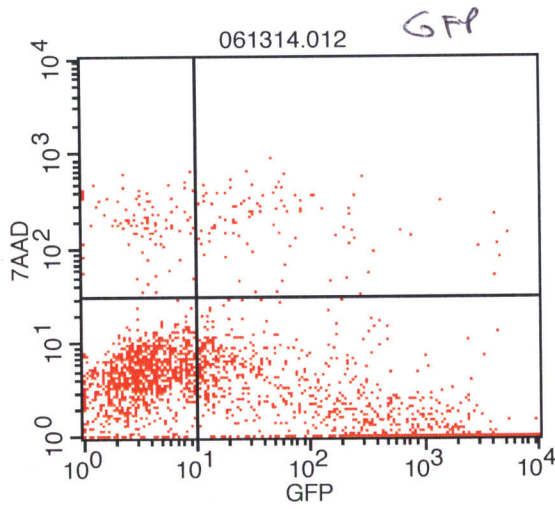

File: 061314.012  
 Sample ID:  
 Acquisition Date: 13-Jun-14  
 Gated Events: 20000  
 X Parameter: FSC-H (Linear)

| Region | Events | % Gated | % |
|--------|--------|---------|---|
| R2     | 1395   | 6.98    |   |

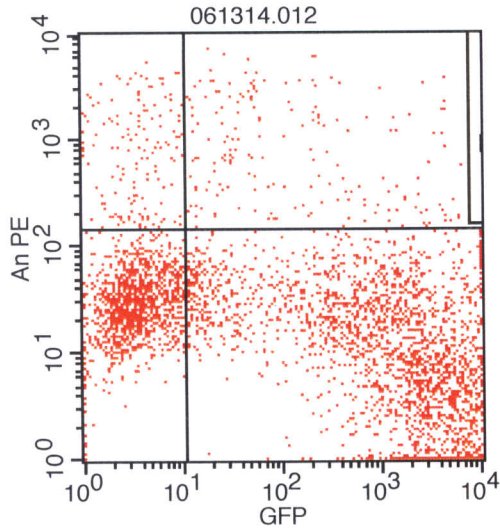

File: 061314.012  
 Sample ID:  
 Acquisition Date: 13-Jun-14  
 Gated Events: 18605  
 X Parameter: GFP (Log)  
 Quad Location: 10, 30

Log Data Units: Linear Values  
 Patient ID:  
 Gate: G1  
 Total Events: 20000  
 Y Parameter: 7AAD (Log)

| Quad | Events | % Gated | % Total | X Mean  | X Geo Mean | Y Mean | Y Geo Mean |
|------|--------|---------|---------|---------|------------|--------|------------|
| UL   | 519    | 2.79    | 2.60    | 4.32    | 3.63       | 242.39 | 195.71     |
| UR   | 501    | 2.69    | 2.50    | 329.00  | 56.58      | 219.65 | 166.97     |
| LL   | 5822   | 31.29   | 29.11   | 3.89    | 3.32       | 5.04   | 4.18       |
| LR   | 11763  | 63.22   | 58.81   | 2694.97 | 945.92     | 1.96   | 1.38       |

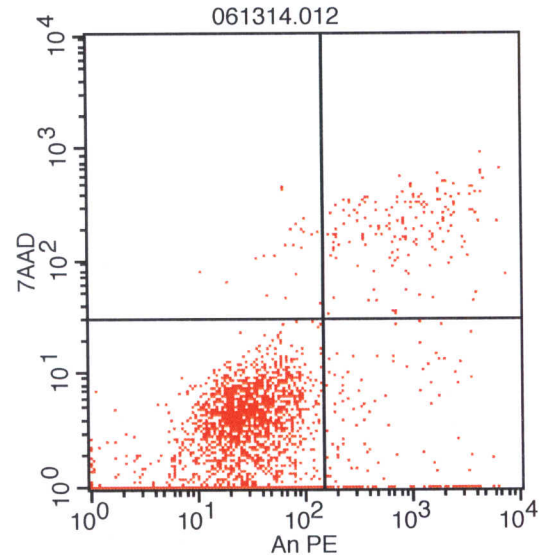

File: 061314.012  
 Sample ID:  
 Acquisition Date: 13-Jun-14  
 Gated Events: 18605  
 X Parameter: GFP (Log)  
 Quad Location: 11, 145

Log Data Units: Linear Values  
 Patient ID:  
 Gate: G1  
 Total Events: 20000  
 Y Parameter: An PE (Log)

| Quad | Events | % Gated | % Total | X Mean  | X Geo Mean | Y Mean  | Y Geo Mean |
|------|--------|---------|---------|---------|------------|---------|------------|
| UL   | 833    | 4.48    | 4.17    | 4.39    | 3.66       | 1224.38 | 737.15     |
| UR   | 915    | 4.92    | 4.58    | 1008.21 | 138.64     | 1313.49 | 729.38     |
| LL   | 5648   | 30.36   | 28.24   | 4.02    | 3.39       | 35.24   | 27.87      |
| LR   | 11209  | 60.25   | 56.05   | 2760.44 | 1032.22    | 21.15   | 9.53       |

File: 061314.012  
 Sample ID:  
 Acquisition Date: 13-Jun-14  
 Gated Events: 18605  
 X Parameter: An PE (Log)  
 Quad Location: 149, 30

Log Data Units: Linear Values  
 Patient ID:  
 Gate: G1  
 Total Events: 20000  
 Y Parameter: 7AAD (Log)

| Quad | Events | % Gated | % Total | X Mean  | X Geo Mean | Y Mean | Y Geo Mean |
|------|--------|---------|---------|---------|------------|--------|------------|
| UL   | 139    | 0.75    | 0.69    | 77.86   | 61.53      | 177.43 | 126.06     |
| UR   | 880    | 4.73    | 4.40    | 1355.41 | 858.46     | 239.95 | 192.06     |
| LL   | 16751  | 90.03   | 83.75   | 25.68   | 13.55      | 2.91   | 1.98       |
| LR   | 835    | 4.49    | 4.17    | 1226.50 | 661.35     | 4.45   | 2.39       |

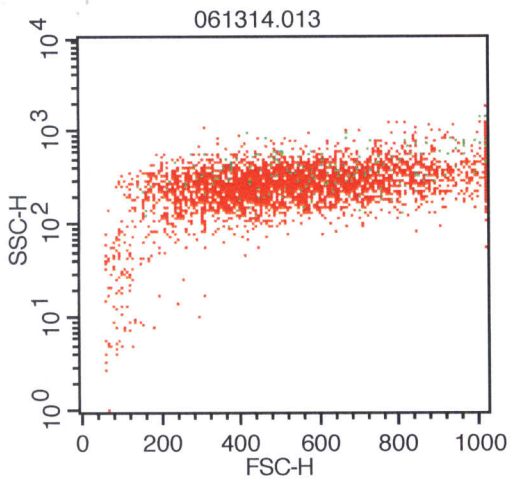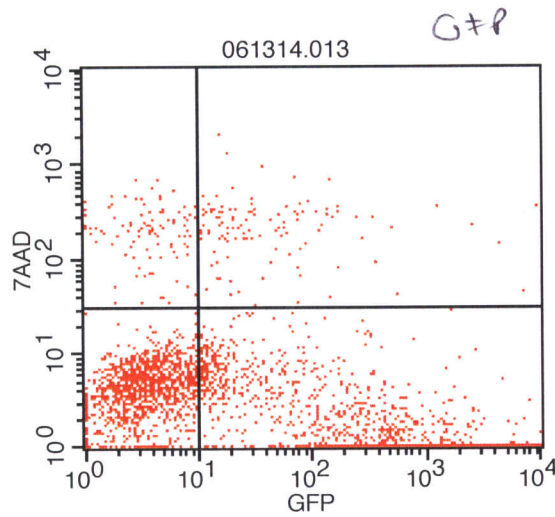

File: 061314.013  
 Sample ID:  
 Acquisition Date: 13-Jun-14  
 Gated Events: 20000  
 X Parameter: FSC-H (Linear)

| Region | Events | % Gated | % Total |
|--------|--------|---------|---------|
| R2     | 1461   | 7.31    |         |

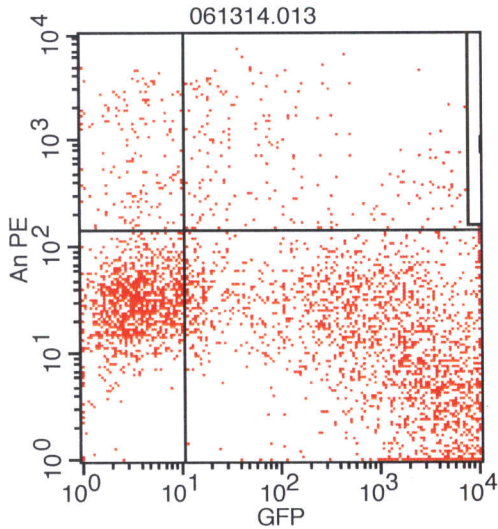

File: 061314.013  
 Sample ID:  
 Acquisition Date: 13-Jun-14  
 Gated Events: 18539  
 X Parameter: GFP (Log)  
 Quad Location: 10, 30

Log Data Units: Linear Values  
 Patient ID:  
 Gate: G1  
 Total Events: 20000  
 Y Parameter: 7AAD (Log)

| Quad | Events | % Gated | % Total | X Mean  | X Geo Mean | Y Mean | Y Geo Mean |
|------|--------|---------|---------|---------|------------|--------|------------|
| UL   | 549    | 2.96    | 2.74    | 4.44    | 3.69       | 257.24 | 198.51     |
| UR   | 532    | 2.87    | 2.66    | 250.43  | 47.19      | 231.49 | 171.55     |
| LL   | 5682   | 30.65   | 28.41   | 3.99    | 3.39       | 5.06   | 4.19       |
| LR   | 11776  | 63.52   | 58.88   | 2659.62 | 906.78     | 2.05   | 1.42       |

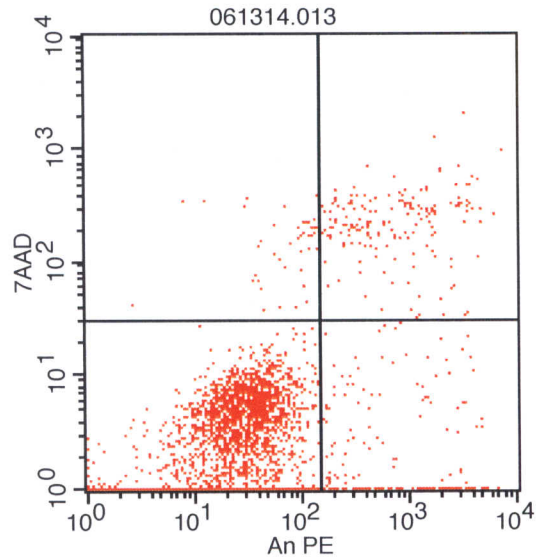

File: 061314.013  
 Sample ID:  
 Acquisition Date: 13-Jun-14  
 Gated Events: 18539  
 X Parameter: GFP (Log)  
 Quad Location: 11, 145

Log Data Units: Linear Values  
 Patient ID:  
 Gate: G1  
 Total Events: 20000  
 Y Parameter: An PE (Log)

| Quad | Events | % Gated | % Total | X Mean  | X Geo Mean | Y Mean  | Y Geo Mean |
|------|--------|---------|---------|---------|------------|---------|------------|
| UL   | 822    | 4.43    | 4.11    | 4.52    | 3.75       | 1244.52 | 743.04     |
| UR   | 1124   | 6.06    | 5.62    | 1166.43 | 177.10     | 1163.19 | 669.06     |
| LL   | 5575   | 30.07   | 27.88   | 4.14    | 3.48       | 36.22   | 28.29      |
| LR   | 11018  | 59.43   | 55.09   | 2735.54 | 993.53     | 22.81   | 10.38      |

File: 061314.013  
 Sample ID:  
 Acquisition Date: 13-Jun-14  
 Gated Events: 18539  
 X Parameter: An PE (Log)  
 Quad Location: 149, 30

Log Data Units: Linear Values  
 Patient ID:  
 Gate: G1  
 Total Events: 20000  
 Y Parameter: 7AAD (Log)

| Quad | Events | % Gated | % Total | X Mean  | X Geo Mean | Y Mean | Y Geo Mean |
|------|--------|---------|---------|---------|------------|--------|------------|
| UL   | 203    | 1.09    | 1.01    | 79.76   | 64.56      | 181.02 | 136.10     |
| UR   | 877    | 4.73    | 4.38    | 1275.17 | 818.45     | 259.52 | 198.70     |
| LL   | 16420  | 88.57   | 82.10   | 26.88   | 14.33      | 2.96   | 2.01       |
| LR   | 1039   | 5.60    | 5.20    | 1162.36 | 640.65     | 4.25   | 2.19       |



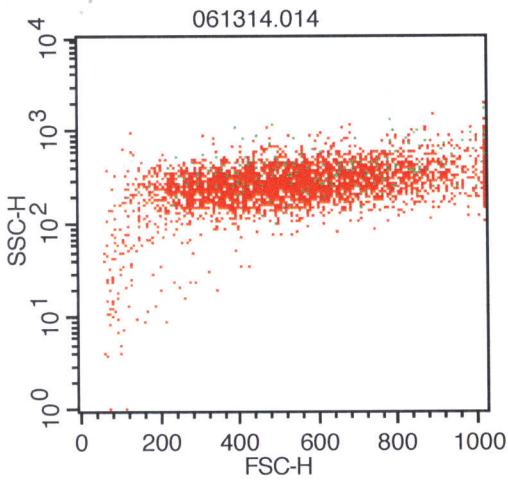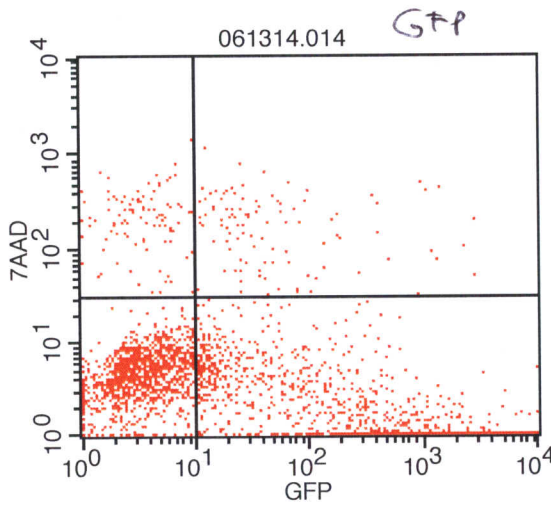

File: 061314.014  
 Sample ID:  
 Acquisition Date: 13-Jun-14  
 Gated Events: 20000  
 X Parameter: FSC-H (Linear)

| Region | Events | % Gated | % |
|--------|--------|---------|---|
| R2     | 1437   | 7.18    |   |

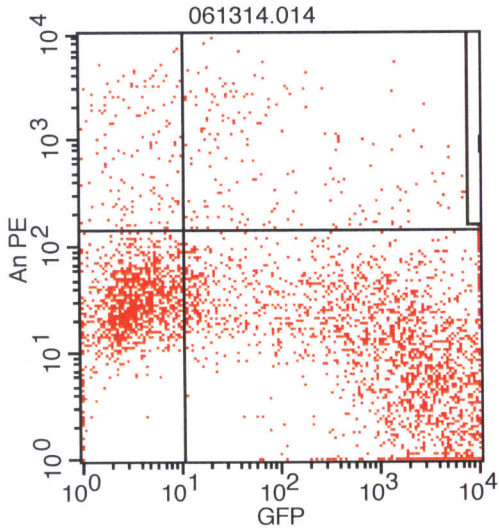

File: 061314.014  
 Sample ID:  
 Acquisition Date: 13-Jun-14  
 Gated Events: 18563  
 X Parameter: GFP (Log)  
 Quad Location: 10, 30

Log Data Units: Linear Values  
 Patient ID:  
 Gate: G1  
 Total Events: 20000  
 Y Parameter: 7AAD (Log)

| Quad | Events | % Gated | % Total | X Mean  | X Geo Mean | Y Mean | Y Geo Mean |
|------|--------|---------|---------|---------|------------|--------|------------|
| UL   | 547    | 2.95    | 2.73    | 4.30    | 3.59       | 258.85 | 204.06     |
| UR   | 540    | 2.91    | 2.70    | 243.95  | 49.79      | 226.57 | 170.40     |
| LL   | 5826   | 31.39   | 29.13   | 3.95    | 3.37       | 5.17   | 4.29       |
| LR   | 11650  | 62.76   | 58.25   | 2734.36 | 952.03     | 1.99   | 1.40       |

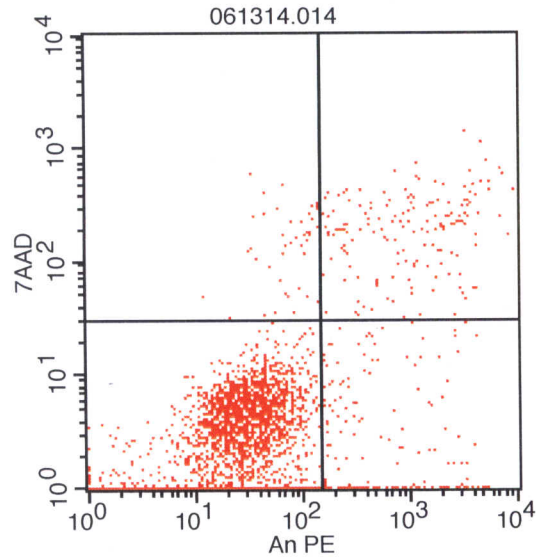

File: 061314.014  
 Sample ID:  
 Acquisition Date: 13-Jun-14  
 Gated Events: 18563  
 X Parameter: GFP (Log)  
 Quad Location: 11, 145

Log Data Units: Linear Values  
 Patient ID:  
 Gate: G1  
 Total Events: 20000  
 Y Parameter: An PE (Log)

| Quad | Events | % Gated | % Total | X Mean  | X Geo Mean | Y Mean  | Y Geo Mean |
|------|--------|---------|---------|---------|------------|---------|------------|
| UL   | 778    | 4.19    | 3.89    | 4.54    | 3.75       | 1264.55 | 744.15     |
| UR   | 958    | 5.16    | 4.79    | 791.35  | 109.03     | 1338.66 | 746.68     |
| LL   | 5741   | 30.93   | 28.71   | 4.07    | 3.44       | 36.79   | 28.67      |
| LR   | 11086  | 59.72   | 55.43   | 2816.83 | 1055.42    | 21.36   | 9.62       |

File: 061314.014  
 Sample ID:  
 Acquisition Date: 13-Jun-14  
 Gated Events: 18563  
 X Parameter: An PE (Log)  
 Quad Location: 149, 30

Log Data Units: Linear Values  
 Patient ID:  
 Gate: G1  
 Total Events: 20000  
 Y Parameter: 7AAD (Log)

| Quad | Events | % Gated | % Total | X Mean  | X Geo Mean | Y Mean | Y Geo Mean |
|------|--------|---------|---------|---------|------------|--------|------------|
| UL   | 209    | 1.13    | 1.04    | 84.20   | 65.39      | 194.71 | 150.80     |
| UR   | 877    | 4.72    | 4.38    | 1453.16 | 879.76     | 254.52 | 196.70     |
| LL   | 16648  | 89.68   | 83.24   | 26.12   | 13.75      | 2.96   | 2.01       |
| LR   | 829    | 4.47    | 4.15    | 1191.10 | 663.61     | 4.89   | 2.49       |



EV Syn gtp pCDNA

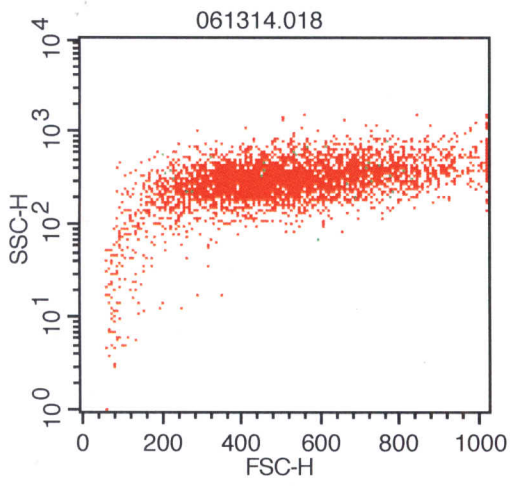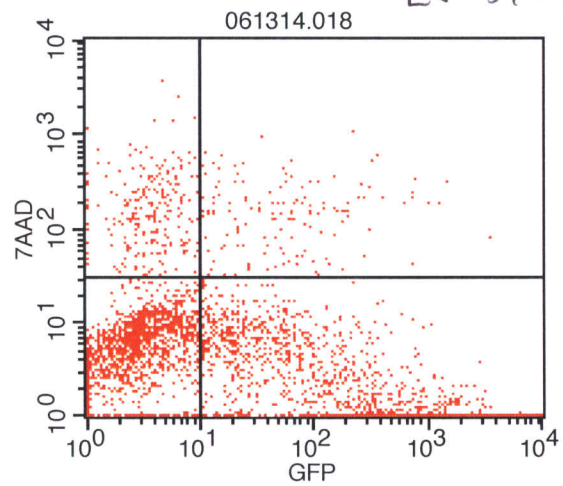

File: 061314.018  
 Sample ID:  
 Acquisition Date: 13-Jun-14  
 Gated Events: 20000  
 X Parameter: FSC-H (Linear)

| Region | Events | % Gated | % Total |
|--------|--------|---------|---------|
| R2     | 263    | 1.31    |         |

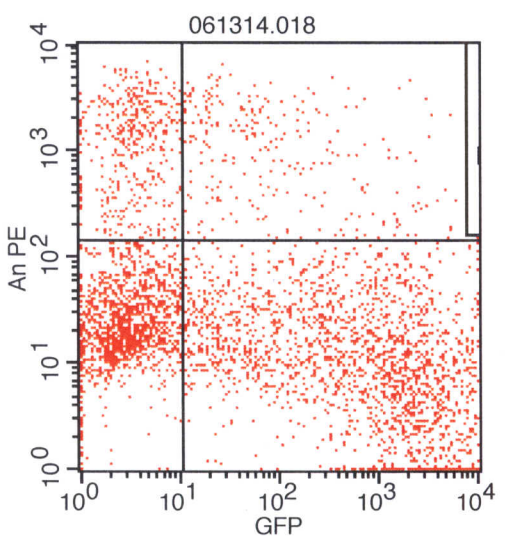

File: 061314.018  
 Sample ID:  
 Acquisition Date: 13-Jun-14  
 Gated Events: 19737  
 X Parameter: GFP (Log)  
 Quad Location: 10, 30

Log Data Units: Linear Values  
 Patient ID:  
 Gate: G1  
 Total Events: 20000  
 Y Parameter: 7AAD (Log)

| Quad | Events | % Gated | % Total | X Mean  | X Geo Mean | Y Mean | Y Geo Mean |
|------|--------|---------|---------|---------|------------|--------|------------|
| UL   | 1227   | 6.22    | 6.13    | 3.87    | 3.34       | 211.45 | 143.04     |
| UR   | 702    | 3.56    | 3.51    | 125.31  | 48.71      | 197.75 | 137.90     |
| LL   | 7112   | 36.03   | 35.56   | 3.38    | 2.80       | 6.76   | 5.33       |
| LR   | 10696  | 54.19   | 53.48   | 1711.91 | 457.16     | 2.85   | 1.77       |

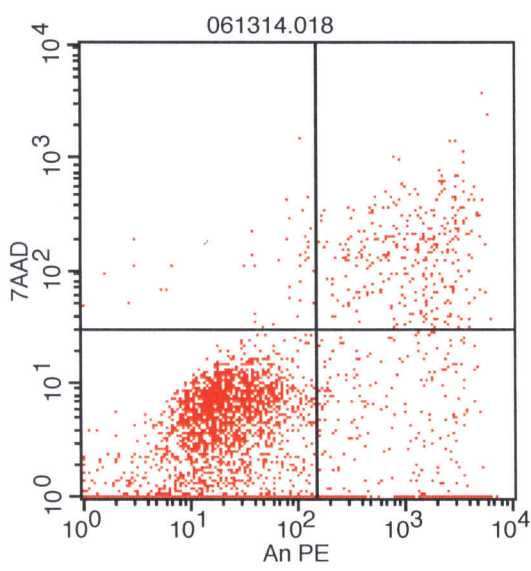

File: 061314.018  
 Sample ID:  
 Acquisition Date: 13-Jun-14  
 Gated Events: 19737  
 X Parameter: GFP (Log)  
 Quad Location: 11, 145

Log Data Units: Linear Values  
 Patient ID:  
 Gate: G1  
 Total Events: 20000  
 Y Parameter: An PE (Log)

| Quad | Events | % Gated | % Total | X Mean  | X Geo Mean | Y Mean  | Y Geo Mean |
|------|--------|---------|---------|---------|------------|---------|------------|
| UL   | 2145   | 10.87   | 10.72   | 3.87    | 3.22       | 1637.31 | 1051.32    |
| UR   | 1397   | 7.08    | 6.98    | 530.58  | 96.26      | 1463.44 | 896.81     |
| LL   | 6369   | 32.27   | 31.85   | 3.51    | 2.86       | 30.38   | 22.10      |
| LR   | 9826   | 49.78   | 49.13   | 1796.82 | 520.10     | 20.56   | 10.46      |

File: 061314.018  
 Sample ID:  
 Acquisition Date: 13-Jun-14  
 Gated Events: 19737  
 X Parameter: An PE (Log)  
 Quad Location: 149, 30

Log Data Units: Linear Values  
 Patient ID:  
 Gate: G1  
 Total Events: 20000  
 Y Parameter: 7AAD (Log)

| Quad | Events | % Gated | % Total | X Mean  | X Geo Mean | Y Mean | Y Geo Mean |
|------|--------|---------|---------|---------|------------|--------|------------|
| UL   | 148    | 0.75    | 0.74    | 81.02   | 62.29      | 170.25 | 116.10     |
| UR   | 1778   | 9.01    | 8.89    | 1608.34 | 1100.65    | 209.78 | 143.84     |
| LL   | 16074  | 81.44   | 80.37   | 24.11   | 13.90      | 4.24   | 2.73       |
| LR   | 1737   | 8.80    | 8.69    | 1550.28 | 910.09     | 6.08   | 3.03       |

EV 577 gfp pcDNA

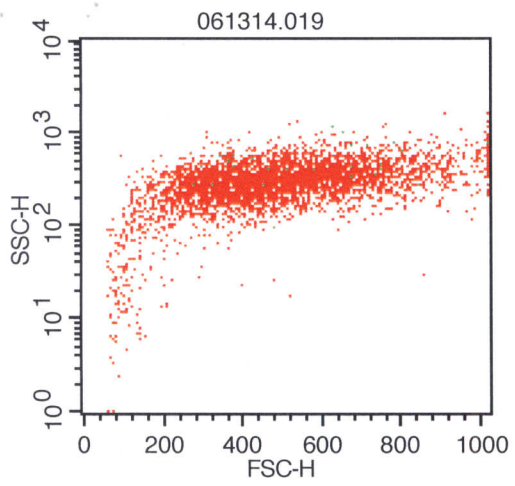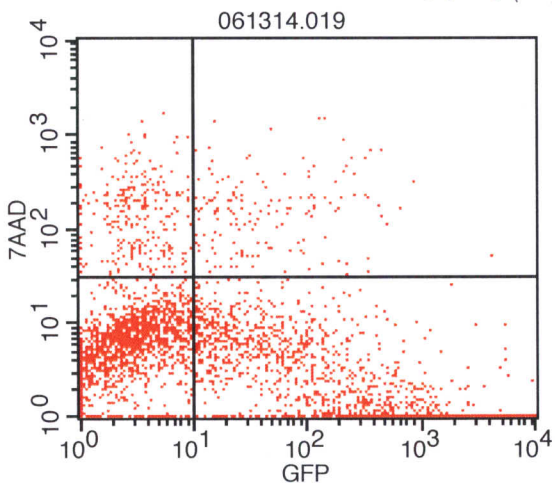

File: 061314.019  
 Sample ID:  
 Acquisition Date: 13-Jun-14  
 Gated Events: 20000  
 X Parameter: FSC-H (Linear)

| Region | Events | % Gated | % |
|--------|--------|---------|---|
| R2     | 267    | 1.33    |   |

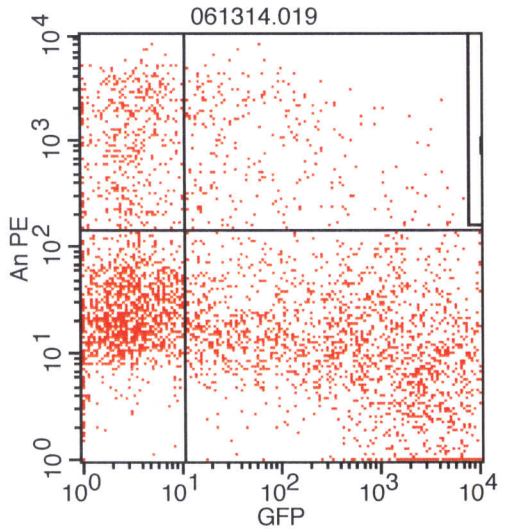

File: 061314.019  
 Sample ID:  
 Acquisition Date: 13-Jun-14  
 Gated Events: 19733  
 X Parameter: GFP (Log)  
 Quad Location: 10, 30  
 Log Data Units: Linear Values  
 Patient ID:  
 Gate: G1  
 Total Events: 20000  
 Y Parameter: 7AAD (Log)

| Quad | Events | % Gated | % Total | X Mean  | X Geo Mean | Y Mean | Y Geo Mean |
|------|--------|---------|---------|---------|------------|--------|------------|
| UL   | 1319   | 6.68    | 6.59    | 3.84    | 3.29       | 212.96 | 144.02     |
| UR   | 791    | 4.01    | 3.96    | 99.10   | 43.69      | 211.19 | 145.14     |
| LL   | 7010   | 35.52   | 35.05   | 3.38    | 2.79       | 6.91   | 5.46       |
| LR   | 10613  | 53.78   | 53.06   | 1664.67 | 438.86     | 3.02   | 1.83       |

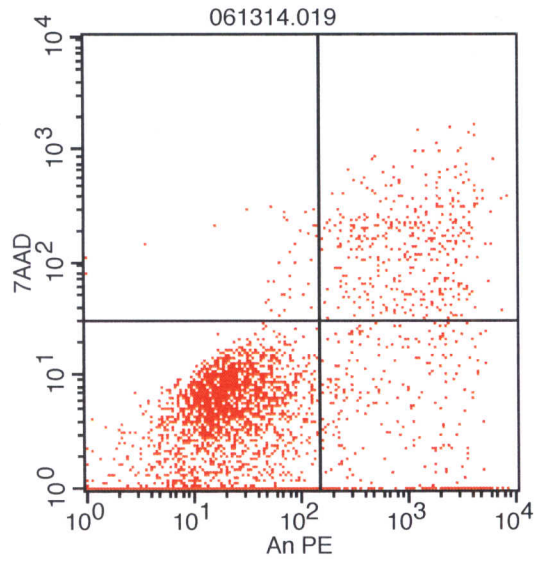

File: 061314.019  
 Sample ID:  
 Acquisition Date: 13-Jun-14  
 Gated Events: 19733  
 X Parameter: GFP (Log)  
 Quad Location: 11, 145  
 Log Data Units: Linear Values  
 Patient ID:  
 Gate: G1  
 Total Events: 20000  
 Y Parameter: An PE (Log)

| Quad | Events | % Gated | % Total | X Mean  | X Geo Mean | Y Mean  | Y Geo Mean |
|------|--------|---------|---------|---------|------------|---------|------------|
| UL   | 2214   | 11.22   | 11.07   | 3.79    | 3.15       | 1650.90 | 1079.06    |
| UR   | 1466   | 7.43    | 7.33    | 405.43  | 80.28      | 1484.04 | 919.44     |
| LL   | 6282   | 31.83   | 31.41   | 3.52    | 2.87       | 30.57   | 22.23      |
| LR   | 9771   | 49.52   | 48.85   | 1755.14 | 500.89     | 20.72   | 11.06      |

File: 061314.019  
 Sample ID:  
 Acquisition Date: 13-Jun-14  
 Gated Events: 19733  
 X Parameter: An PE (Log)  
 Quad Location: 149, 30  
 Log Data Units: Linear Values  
 Patient ID:  
 Gate: G1  
 Total Events: 20000  
 Y Parameter: 7AAD (Log)

| Quad | Events | % Gated | % Total | X Mean  | X Geo Mean | Y Mean | Y Geo Mean |
|------|--------|---------|---------|---------|------------|--------|------------|
| UL   | 180    | 0.91    | 0.90    | 80.03   | 63.02      | 182.11 | 118.19     |
| UR   | 1925   | 9.76    | 9.62    | 1603.77 | 1104.24    | 215.59 | 147.77     |
| LL   | 15895  | 80.55   | 79.47   | 24.11   | 14.34      | 4.32   | 2.77       |
| LR   | 1733   | 8.78    | 8.67    | 1581.20 | 942.06     | 6.83   | 3.39       |



EV S<sub>72</sub> GFP PCDNA

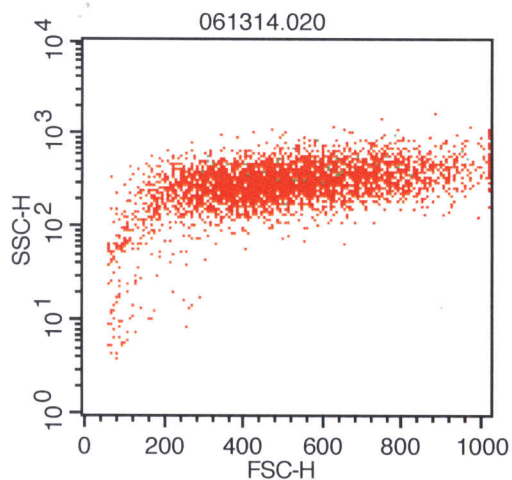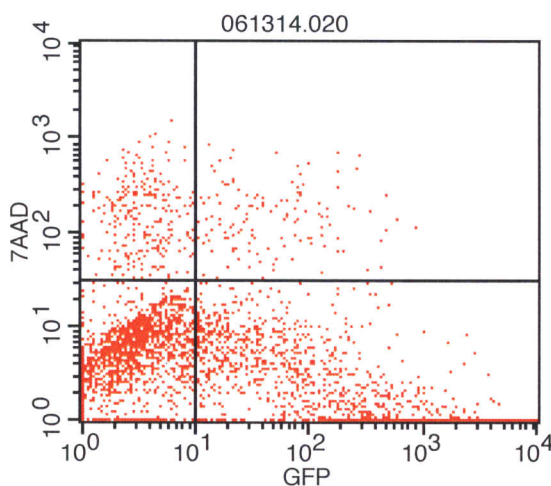

File: 061314.020  
 Sample ID:  
 Acquisition Date: 13-Jun-14  
 Gated Events: 20000  
 X Parameter: FSC-H (Linear)

| Region | Events | % Gated | % |
|--------|--------|---------|---|
| R2     | 322    | 1.61    |   |

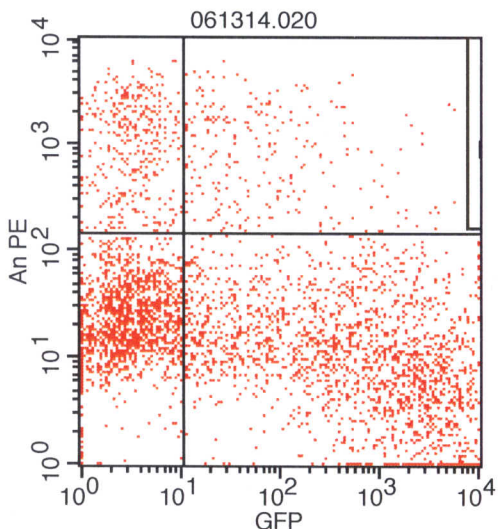

File: 061314.020  
 Sample ID:  
 Acquisition Date: 13-Jun-14  
 Gated Events: 19678  
 X Parameter: GFP (Log)  
 Quad Location: 10, 30

Log Data Units: Linear Values  
 Patient ID:  
 Gate: G1  
 Total Events: 20000  
 Y Parameter: 7AAD (Log)

| Quad | Events | % Gated | % Total | X Mean  | X Geo Mean | Y Mean | Y Geo Mean |
|------|--------|---------|---------|---------|------------|--------|------------|
| UL   | 1322   | 6.72    | 6.61    | 3.85    | 3.29       | 205.73 | 142.97     |
| UR   | 748    | 3.80    | 3.74    | 114.76  | 47.95      | 202.45 | 141.51     |
| LL   | 7064   | 35.90   | 35.32   | 3.38    | 2.79       | 6.43   | 5.05       |
| LR   | 10544  | 53.58   | 52.72   | 1761.03 | 461.15     | 2.75   | 1.71       |

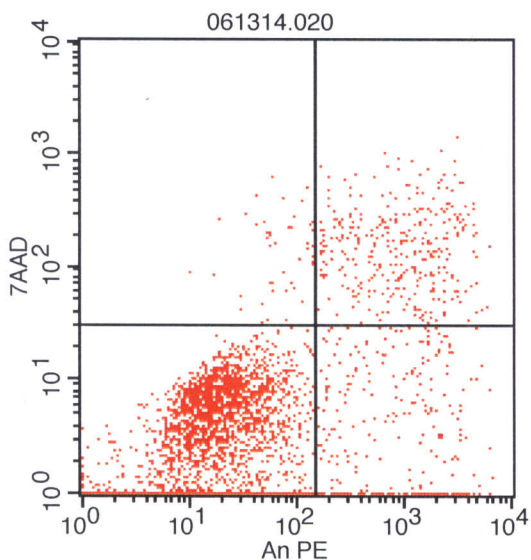

File: 061314.020  
 Sample ID:  
 Acquisition Date: 13-Jun-14  
 Gated Events: 19678  
 X Parameter: GFP (Log)  
 Quad Location: 11, 145

Log Data Units: Linear Values  
 Patient ID:  
 Gate: G1  
 Total Events: 20000  
 Y Parameter: An PE (Log)

| Quad | Events | % Gated | % Total | X Mean  | X Geo Mean | Y Mean  | Y Geo Mean |
|------|--------|---------|---------|---------|------------|---------|------------|
| UL   | 2034   | 10.34   | 10.17   | 3.84    | 3.20       | 1421.38 | 936.41     |
| UR   | 1304   | 6.63    | 6.52    | 363.99  | 78.07      | 1343.15 | 847.25     |
| LL   | 6523   | 33.15   | 32.62   | 3.51    | 2.87       | 28.90   | 20.27      |
| LR   | 9817   | 49.89   | 49.09   | 1851.66 | 525.02     | 18.29   | 9.27       |

File: 061314.020  
 Sample ID:  
 Acquisition Date: 13-Jun-14  
 Gated Events: 19678  
 X Parameter: An PE (Log)  
 Quad Location: 149, 30

Log Data Units: Linear Values  
 Patient ID:  
 Gate: G1  
 Total Events: 20000  
 Y Parameter: 7AAD (Log)

| Quad | Events | % Gated | % Total | X Mean  | X Geo Mean | Y Mean | Y Geo Mean |
|------|--------|---------|---------|---------|------------|--------|------------|
| UL   | 270    | 1.37    | 1.35    | 80.53   | 65.15      | 170.22 | 117.38     |
| UR   | 1797   | 9.13    | 8.98    | 1336.02 | 897.73     | 209.99 | 147.03     |
| LL   | 16100  | 81.82   | 80.50   | 21.79   | 12.38      | 3.99   | 2.59       |
| LR   | 1511   | 7.68    | 7.56    | 1480.68 | 936.93     | 6.73   | 3.36       |



87P S22 qf pDNA

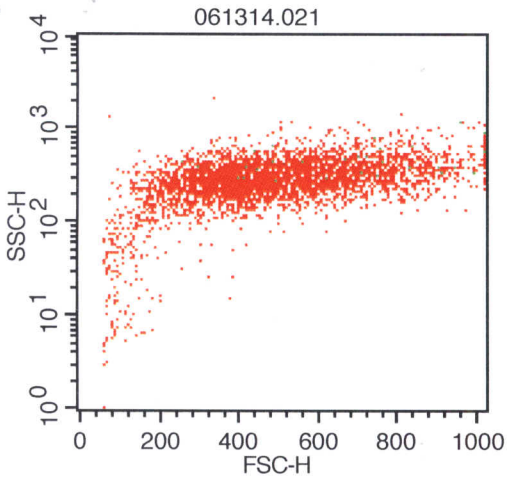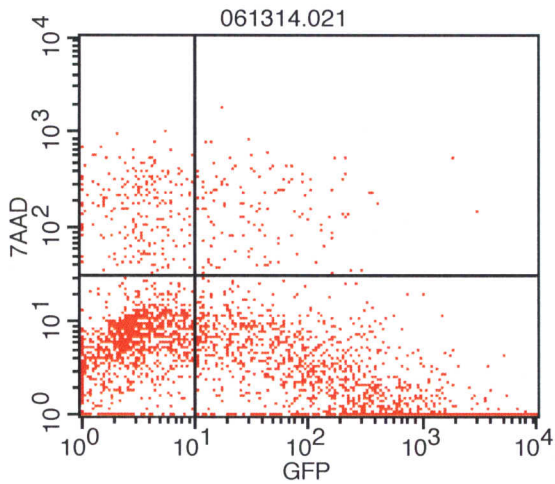

File: 061314.021  
 Sample ID:  
 Acquisition Date: 13-Jun-14  
 Gated Events: 20000  
 X Parameter: FSC-H (Linear)

| Region | Events | % Gated | % |
|--------|--------|---------|---|
| R2     | 274    | 1.37    |   |

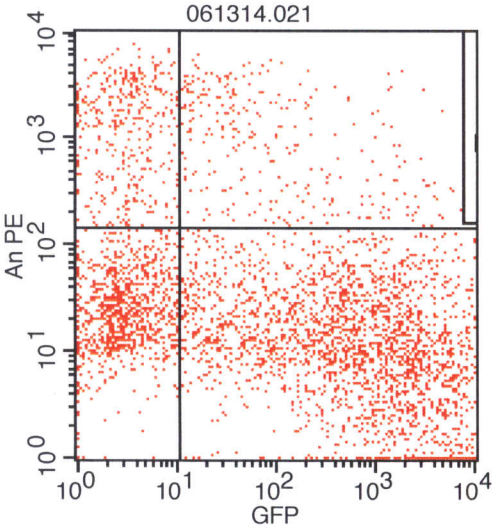

File: 061314.021  
 Sample ID:  
 Acquisition Date: 13-Jun-14  
 Gated Events: 19726  
 X Parameter: GFP (Log)  
 Quad Location: 10, 30  
 Log Data Units: Linear Values  
 Patient ID:  
 Gate: G1  
 Total Events: 20000  
 Y Parameter: 7AAD (Log)

| Quad | Events | % Gated | % Total | X Mean  | X Geo Mean | Y Mean | Y Geo Mean |
|------|--------|---------|---------|---------|------------|--------|------------|
| UL   | 1123   | 5.69    | 5.62    | 3.88    | 3.29       | 227.72 | 163.30     |
| UR   | 673    | 3.41    | 3.36    | 110.87  | 44.33      | 209.97 | 150.19     |
| LL   | 5572   | 28.25   | 27.86   | 3.49    | 2.88       | 6.77   | 5.30       |
| LR   | 12358  | 62.65   | 61.79   | 1631.82 | 489.70     | 2.69   | 1.71       |

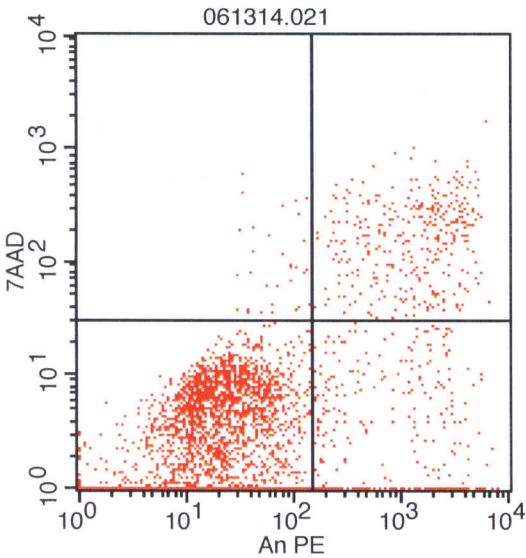

File: 061314.021  
 Sample ID:  
 Acquisition Date: 13-Jun-14  
 Gated Events: 19726  
 X Parameter: GFP (Log)  
 Quad Location: 11, 145  
 Log Data Units: Linear Values  
 Patient ID:  
 Gate: G1  
 Total Events: 20000  
 Y Parameter: An PE (Log)

| Quad | Events | % Gated | % Total | X Mean  | X Geo Mean | Y Mean  | Y Geo Mean |
|------|--------|---------|---------|---------|------------|---------|------------|
| UL   | 1900   | 9.63    | 9.50    | 3.90    | 3.19       | 1864.03 | 1216.82    |
| UR   | 1409   | 7.14    | 7.04    | 545.53  | 100.12     | 1507.55 | 903.55     |
| LL   | 4927   | 24.98   | 24.64   | 3.60    | 2.96       | 30.83   | 22.51      |
| LR   | 11490  | 58.25   | 57.45   | 1694.57 | 540.28     | 21.12   | 11.29      |

File: 061314.021  
 Sample ID:  
 Acquisition Date: 13-Jun-14  
 Gated Events: 19726  
 X Parameter: An PE (Log)  
 Quad Location: 149, 30  
 Log Data Units: Linear Values  
 Patient ID:  
 Gate: G1  
 Total Events: 20000  
 Y Parameter: 7AAD (Log)

| Quad | Events | % Gated | % Total | X Mean  | X Geo Mean | Y Mean | Y Geo Mean |
|------|--------|---------|---------|---------|------------|--------|------------|
| UL   | 119    | 0.60    | 0.60    | 80.37   | 70.31      | 145.43 | 101.77     |
| UR   | 1674   | 8.49    | 8.37    | 1835.84 | 1277.78    | 226.79 | 163.79     |
| LL   | 16321  | 82.74   | 81.61   | 23.80   | 13.77      | 3.76   | 2.39       |
| LR   | 1612   | 8.17    | 8.06    | 1606.21 | 918.92     | 5.94   | 2.97       |

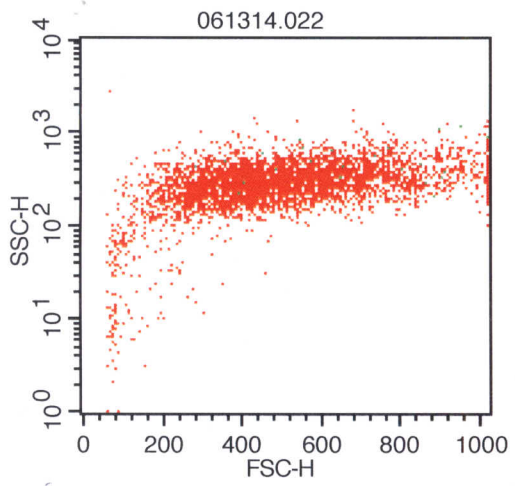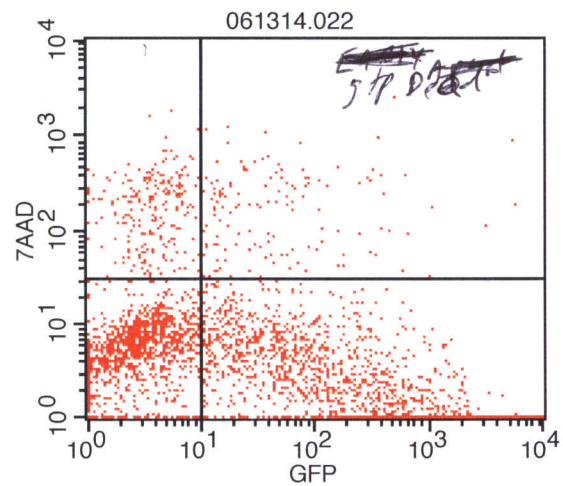

File: 061314.022  
 Sample ID:  
 Acquisition Date: 13-Jun-14  
 Gated Events: 20000  
 X Parameter: FSC-H (Linear)

| Region | Events | % Gated | % |
|--------|--------|---------|---|
| R2     | 231    | 1.16    |   |

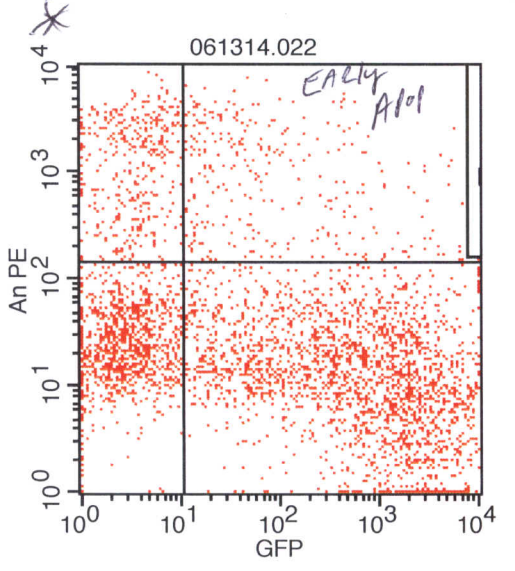

File: 061314.022  
 Sample ID:  
 Acquisition Date: 13-Jun-14  
 Gated Events: 19769  
 X Parameter: GFP (Log)  
 Quad Location: 10, 30

Log Data Units: Linear Values  
 Patient ID:  
 Gate: G1  
 Total Events: 20000  
 Y Parameter: 7AAD (Log)

| Quad | Events | % Gated | % Total | X Mean  | X Geo Mean | Y Mean | Y Geo Mean |
|------|--------|---------|---------|---------|------------|--------|------------|
| UL   | 1156   | 5.85    | 5.78    | 3.97    | 3.36       | 229.00 | 160.98     |
| UR   | 776    | 3.93    | 3.88    | 125.74  | 44.46      | 225.52 | 156.66     |
| LL   | 5604   | 28.35   | 28.02   | 3.42    | 2.82       | 6.80   | 5.29       |
| LR   | 12233  | 61.88   | 61.17   | 1603.24 | 479.99     | 2.81   | 1.76       |

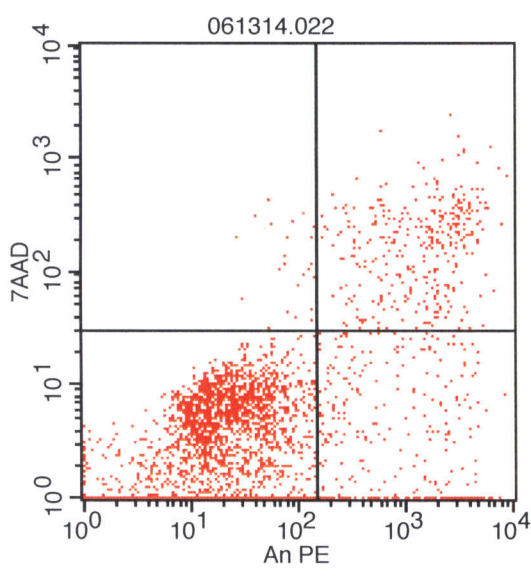

File: 061314.022  
 Sample ID:  
 Acquisition Date: 13-Jun-14  
 Gated Events: 19769  
 X Parameter: GFP (Log)  
 Quad Location: 11, 145

Log Data Units: Linear Values  
 Patient ID:  
 Gate: G1  
 Total Events: 20000  
 Y Parameter: An PE (Log)

| Quad | Events | % Gated | % Total | X Mean  | X Geo Mean | Y Mean  | Y Geo Mean |
|------|--------|---------|---------|---------|------------|---------|------------|
| UL   | 1936   | 9.79    | 9.68    | 3.94    | 3.23       | 1870.07 | 1241.95    |
| UR   | 1529   | 7.73    | 7.65    | 521.41  | 97.99      | 1508.69 | 881.85     |
| LL   | 4957   | 25.07   | 24.79   | 3.53    | 2.89       | 31.75   | 22.95      |
| LR   | 11347  | 57.40   | 56.73   | 1666.64 | 528.55     | 21.11   | 11.25      |

File: 061314.022  
 Sample ID:  
 Acquisition Date: 13-Jun-14  
 Gated Events: 19769  
 X Parameter: An PE (Log)  
 Quad Location: 149, 30

Log Data Units: Linear Values  
 Patient ID:  
 Gate: G1  
 Total Events: 20000  
 Y Parameter: 7AAD (Log)

| Quad | Events | % Gated | % Total | X Mean  | X Geo Mean | Y Mean | Y Geo Mean |
|------|--------|---------|---------|---------|------------|--------|------------|
| UL   | 138    | 0.70    | 0.69    | 89.61   | 76.86      | 135.09 | 97.98      |
| UR   | 1789   | 9.05    | 8.95    | 1821.07 | 1278.81    | 235.29 | 166.08     |
| LL   | 16201  | 81.95   | 81.01   | 24.06   | 13.84      | 3.84   | 2.44       |
| LR   | 1641   | 8.30    | 8.21    | 1623.53 | 915.11     | 6.29   | 3.01       |



87P S<sub>1</sub>-GFP pcDNA3.1

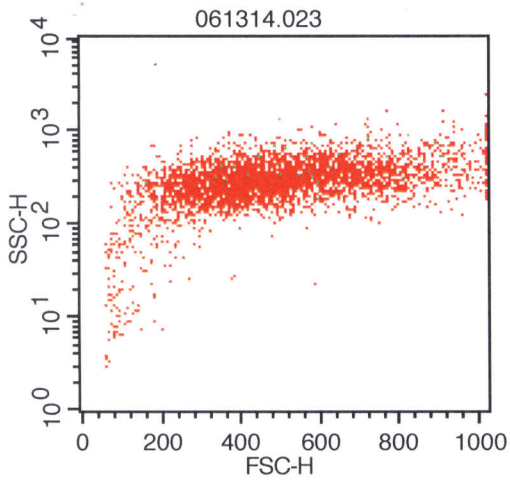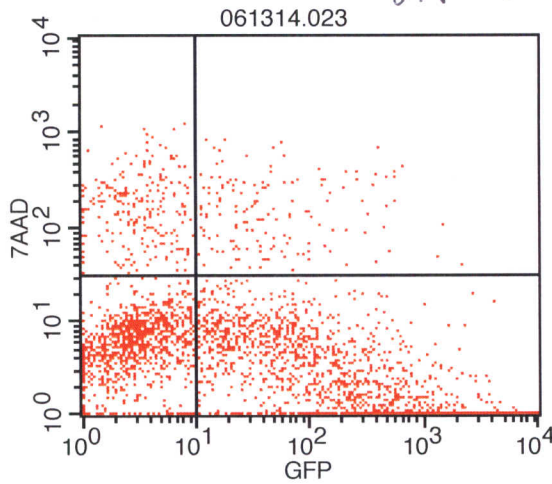

File: 061314.023  
 Sample ID:  
 Acquisition Date: 13-Jun-14  
 Gated Events: 20000  
 X Parameter: FSC-H (Linear)

| Region | Events | % Gated | % Total |
|--------|--------|---------|---------|
| R2     | 240    | 1.20    |         |

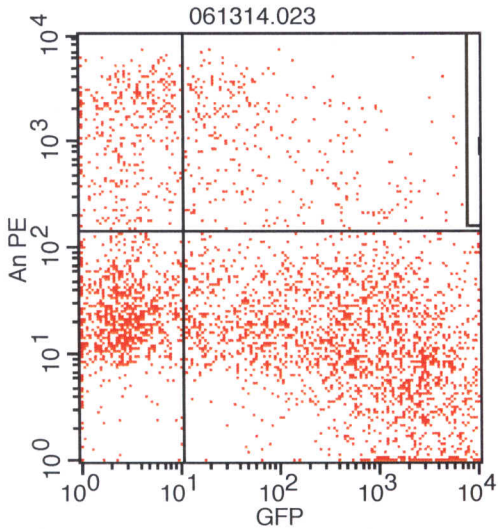

File: 061314.023  
 Sample ID:  
 Acquisition Date: 13-Jun-14  
 Gated Events: 19760  
 X Parameter: GFP (Log)  
 Quad Location: 10, 30

Log Data Units: Linear Values  
 Patient ID:  
 Gate: G1  
 Total Events: 20000  
 Y Parameter: 7AAD (Log)

| Quad | Events | % Gated | % Total | X Mean  | X Geo Mean | Y Mean | Y Geo Mean |
|------|--------|---------|---------|---------|------------|--------|------------|
| UL   | 1210   | 6.12    | 6.05    | 3.92    | 3.31       | 219.08 | 156.84     |
| UR   | 769    | 3.89    | 3.84    | 112.85  | 44.48      | 210.45 | 147.63     |
| LL   | 5462   | 27.64   | 27.31   | 3.45    | 2.85       | 6.79   | 5.33       |
| LR   | 12319  | 62.34   | 61.59   | 1633.21 | 501.01     | 2.73   | 1.72       |

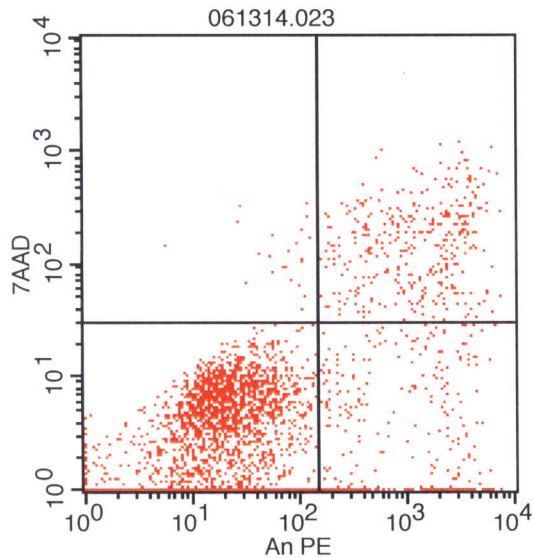

File: 061314.023  
 Sample ID:  
 Acquisition Date: 13-Jun-14  
 Gated Events: 19760  
 X Parameter: GFP (Log)  
 Quad Location: 11, 145

Log Data Units: Linear Values  
 Patient ID:  
 Gate: G1  
 Total Events: 20000  
 Y Parameter: An PE (Log)

| Quad | Events | % Gated | % Total | X Mean  | X Geo Mean | Y Mean  | Y Geo Mean |
|------|--------|---------|---------|---------|------------|---------|------------|
| UL   | 1937   | 9.80    | 9.69    | 4.04    | 3.32       | 1831.98 | 1176.25    |
| UR   | 1513   | 7.66    | 7.56    | 499.94  | 96.70      | 1531.12 | 915.91     |
| LL   | 4888   | 24.74   | 24.44   | 3.55    | 2.90       | 31.15   | 22.77      |
| LR   | 11422  | 57.80   | 57.11   | 1702.71 | 557.53     | 20.63   | 10.86      |

File: 061314.023  
 Sample ID:  
 Acquisition Date: 13-Jun-14  
 Gated Events: 19760  
 X Parameter: An PE (Log)  
 Quad Location: 149, 30

Log Data Units: Linear Values  
 Patient ID:  
 Gate: G1  
 Total Events: 20000  
 Y Parameter: 7AAD (Log)

| Quad | Events | % Gated | % Total | X Mean  | X Geo Mean | Y Mean | Y Geo Mean |
|------|--------|---------|---------|---------|------------|--------|------------|
| UL   | 129    | 0.65    | 0.65    | 77.07   | 61.18      | 155.27 | 111.58     |
| UR   | 1846   | 9.34    | 9.23    | 1792.09 | 1220.28    | 220.35 | 157.18     |
| LL   | 16200  | 81.98   | 81.00   | 23.51   | 13.43      | 3.73   | 2.37       |
| LR   | 1585   | 8.02    | 7.92    | 1611.43 | 909.93     | 6.48   | 3.20       |



VH14P Sin of pcr 3.1

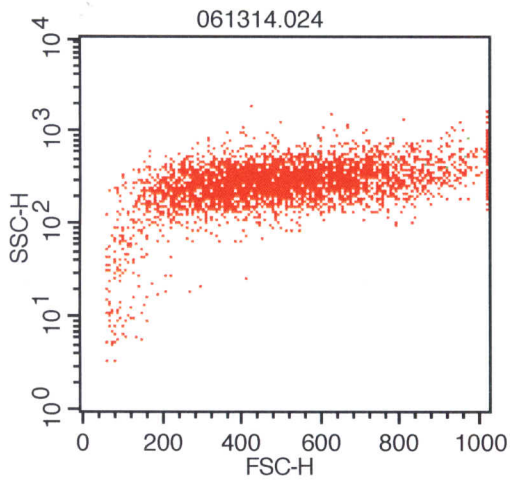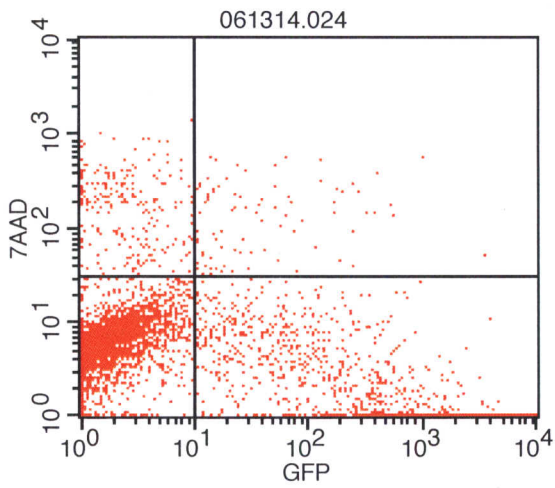

File: 061314.024  
 Sample ID:  
 Acquisition Date: 13-Jun-14  
 Gated Events: 20000  
 X Parameter: FSC-H (Linear)

| Region | Events | % Gated | % |
|--------|--------|---------|---|
| R2     | 61     | 0.30    |   |

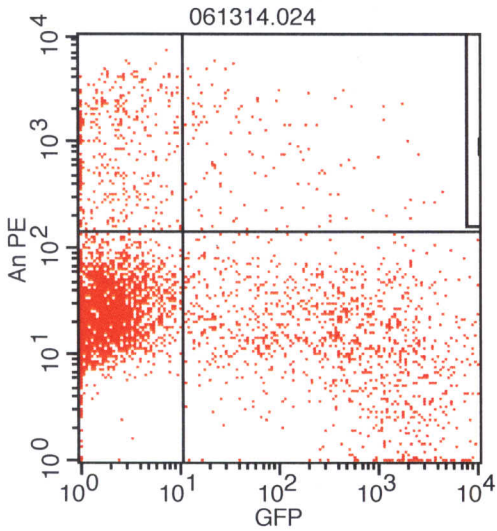

File: 061314.024  
 Sample ID:  
 Acquisition Date: 13-Jun-14  
 Gated Events: 19939  
 X Parameter: GFP (Log)  
 Quad Location: 10, 30  
 Log Data Units: Linear Values  
 Patient ID:  
 Gate: G1  
 Total Events: 20000  
 Y Parameter: 7AAD (Log)

| Quad | Events | % Gated | % Total | X Mean  | X Geo Mean | Y Mean | Y Geo Mean |
|------|--------|---------|---------|---------|------------|--------|------------|
| UL   | 1291   | 6.47    | 6.46    | 3.11    | 2.54       | 218.38 | 152.69     |
| UR   | 398    | 2.00    | 1.99    | 129.88  | 41.34      | 180.95 | 119.98     |
| LL   | 11841  | 59.39   | 59.20   | 2.41    | 2.00       | 6.89   | 5.63       |
| LR   | 6409   | 32.14   | 32.05   | 1243.15 | 369.56     | 3.37   | 2.00       |

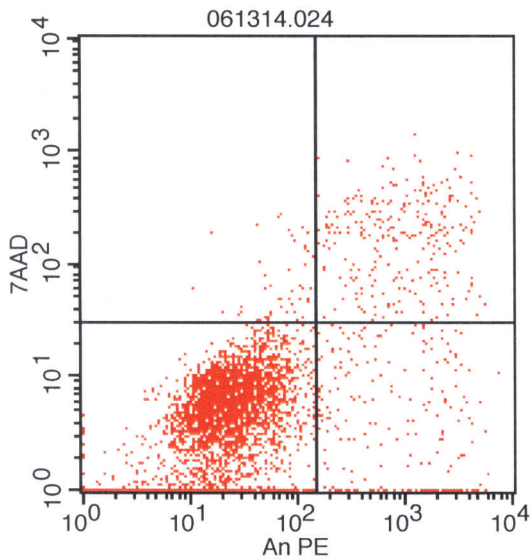

File: 061314.024  
 Sample ID:  
 Acquisition Date: 13-Jun-14  
 Gated Events: 19939  
 X Parameter: GFP (Log)  
 Quad Location: 11, 145  
 Log Data Units: Linear Values  
 Patient ID:  
 Gate: G1  
 Total Events: 20000  
 Y Parameter: An PE (Log)

| Quad | Events | % Gated | % Total | X Mean  | X Geo Mean | Y Mean  | Y Geo Mean |
|------|--------|---------|---------|---------|------------|---------|------------|
| UL   | 1871   | 9.38    | 9.35    | 3.11    | 2.51       | 1459.19 | 929.68     |
| UR   | 618    | 3.10    | 3.09    | 356.94  | 77.55      | 1214.51 | 754.81     |
| LL   | 11361  | 56.98   | 56.81   | 2.44    | 2.00       | 30.85   | 24.00      |
| LR   | 6089   | 30.54   | 30.45   | 1280.57 | 397.98     | 22.91   | 13.00      |

File: 061314.024  
 Sample ID:  
 Acquisition Date: 13-Jun-14  
 Gated Events: 19939  
 X Parameter: An PE (Log)  
 Quad Location: 149, 30  
 Log Data Units: Linear Values  
 Patient ID:  
 Gate: G1  
 Total Events: 20000  
 Y Parameter: 7AAD (Log)

| Quad | Events | % Gated | % Total | X Mean  | X Geo Mean | Y Mean | Y Geo Mean |
|------|--------|---------|---------|---------|------------|--------|------------|
| UL   | 236    | 1.18    | 1.18    | 77.74   | 65.76      | 120.26 | 84.16      |
| UR   | 1448   | 7.26    | 7.24    | 1426.79 | 982.83     | 224.74 | 158.35     |
| LL   | 17237  | 86.45   | 86.19   | 27.56   | 19.10      | 5.57   | 3.92       |
| LR   | 1018   | 5.11    | 5.09    | 1386.38 | 789.12     | 7.26   | 3.92       |

VH14P S<sub>1</sub>-gtr pCDNA3.1

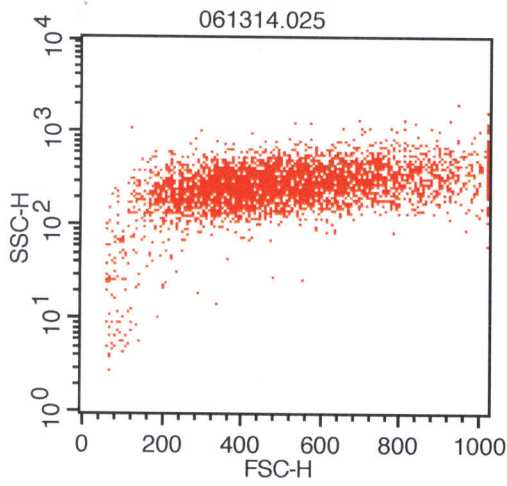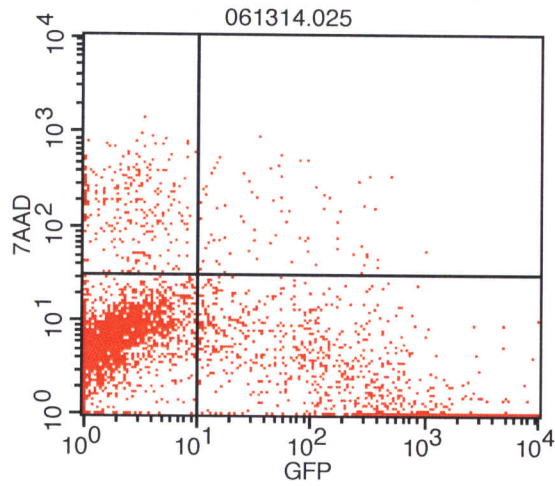

File: 061314.025  
 Sample ID:  
 Acquisition Date: 13-Jun-14  
 Gated Events: 20000  
 X Parameter: FSC-H (Linear)

| Region | Events | % Gated | % |
|--------|--------|---------|---|
| R2     | 59     | 0.29    |   |

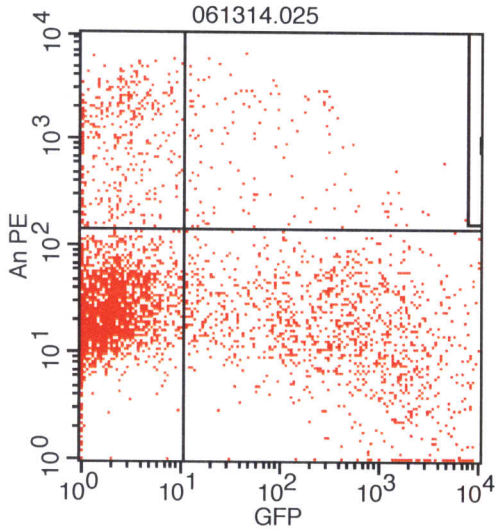

File: 061314.025  
 Sample ID:  
 Acquisition Date: 13-Jun-14  
 Gated Events: 19941  
 X Parameter: GFP (Log)  
 Quad Location: 10, 30

Log Data Units: Linear Values  
 Patient ID:  
 Gate: G1  
 Total Events: 20000  
 Y Parameter: 7AAD (Log)

| Quad | Events | % Gated | % Total | X Mean  | X Geo Mean | Y Mean | Y Geo Mean |
|------|--------|---------|---------|---------|------------|--------|------------|
| UL   | 1384   | 6.94    | 6.92    | 3.12    | 2.56       | 227.33 | 160.05     |
| UR   | 410    | 2.06    | 2.05    | 126.43  | 42.50      | 189.83 | 130.62     |
| LL   | 11707  | 58.71   | 58.54   | 2.41    | 2.00       | 7.00   | 5.72       |
| LR   | 6440   | 32.30   | 32.20   | 1204.07 | 362.95     | 3.41   | 2.02       |

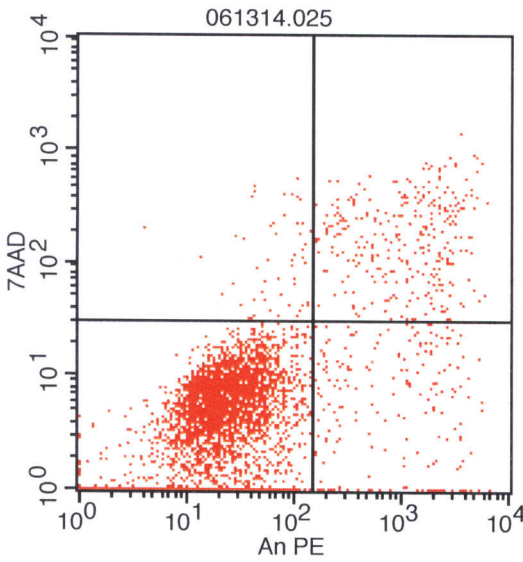

File: 061314.025  
 Sample ID:  
 Acquisition Date: 13-Jun-14  
 Gated Events: 19941  
 X Parameter: GFP (Log)  
 Quad Location: 11, 145

Log Data Units: Linear Values  
 Patient ID:  
 Gate: G1  
 Total Events: 20000  
 Y Parameter: An PE (Log)

| Quad | Events | % Gated | % Total | X Mean  | X Geo Mean | Y Mean  | Y Geo Mean |
|------|--------|---------|---------|---------|------------|---------|------------|
| UL   | 1999   | 10.02   | 9.99    | 3.12    | 2.53       | 1470.98 | 930.77     |
| UR   | 660    | 3.31    | 3.30    | 479.85  | 93.19      | 1283.43 | 770.62     |
| LL   | 11195  | 56.14   | 55.97   | 2.45    | 2.01       | 30.56   | 23.68      |
| LR   | 6087   | 30.53   | 30.44   | 1230.21 | 386.61     | 23.40   | 13.88      |

File: 061314.025  
 Sample ID:  
 Acquisition Date: 13-Jun-14  
 Gated Events: 19941  
 X Parameter: An PE (Log)  
 Quad Location: 149, 30

Log Data Units: Linear Values  
 Patient ID:  
 Gate: G1  
 Total Events: 20000  
 Y Parameter: 7AAD (Log)

| Quad | Events | % Gated | % Total | X Mean  | X Geo Mean | Y Mean | Y Geo Mean |
|------|--------|---------|---------|---------|------------|--------|------------|
| UL   | 251    | 1.26    | 1.26    | 77.94   | 63.61      | 144.48 | 94.79      |
| UR   | 1540   | 7.72    | 7.70    | 1489.97 | 1011.79    | 231.23 | 165.68     |
| LL   | 17052  | 85.51   | 85.26   | 27.45   | 19.33      | 5.59   | 3.93       |
| LR   | 1098   | 5.51    | 5.49    | 1356.93 | 765.64     | 7.92   | 4.28       |



061314.026 57-044 PC DNA 3.1

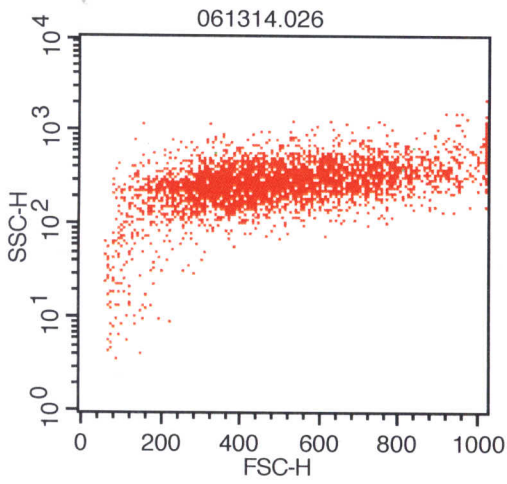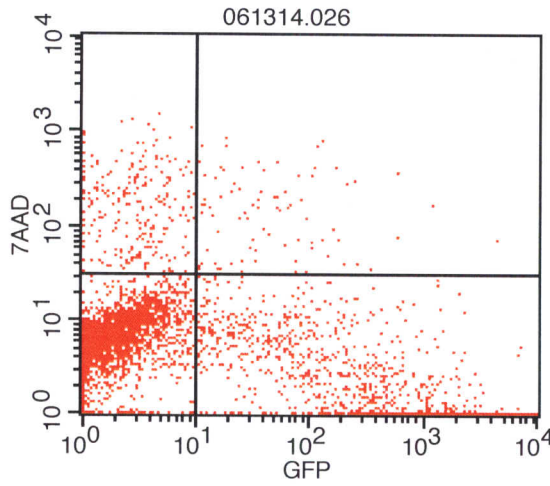

File: 061314.026  
 Sample ID:  
 Acquisition Date: 13-Jun-14  
 Gated Events: 20000  
 X Parameter: FSC-H (Linear)

| Region | Events | % Gated | % |
|--------|--------|---------|---|
| R2     | 39     | 0.19    |   |

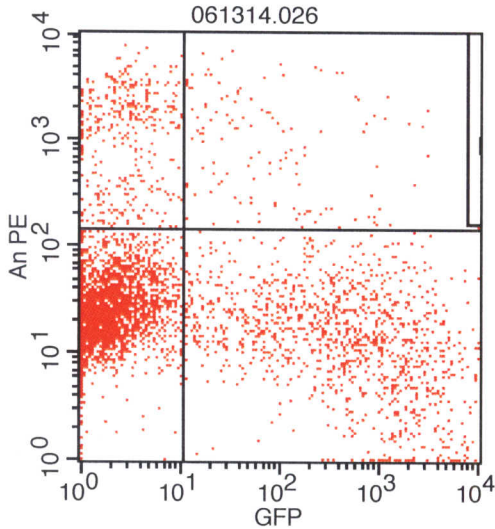

File: 061314.026  
 Sample ID:  
 Acquisition Date: 13-Jun-14  
 Gated Events: 19961  
 X Parameter: GFP (Log)  
 Quad Location: 10, 30  
 Log Data Units: Linear Values  
 Patient ID:  
 Gate: G1  
 Total Events: 20000  
 Y Parameter: 7AAD (Log)

| Quad | Events | % Gated | % Total | X Mean  | X Geo Mean | Y Mean | Y Geo Mean |
|------|--------|---------|---------|---------|------------|--------|------------|
| UL   | 1368   | 6.85    | 6.84    | 3.35    | 2.73       | 232.93 | 157.87     |
| UR   | 440    | 2.20    | 2.20    | 126.88  | 43.71      | 194.97 | 126.60     |
| LL   | 11747  | 58.85   | 58.74   | 2.47    | 2.03       | 7.02   | 5.71       |
| LR   | 6406   | 32.09   | 32.03   | 1165.87 | 349.43     | 3.50   | 2.09       |

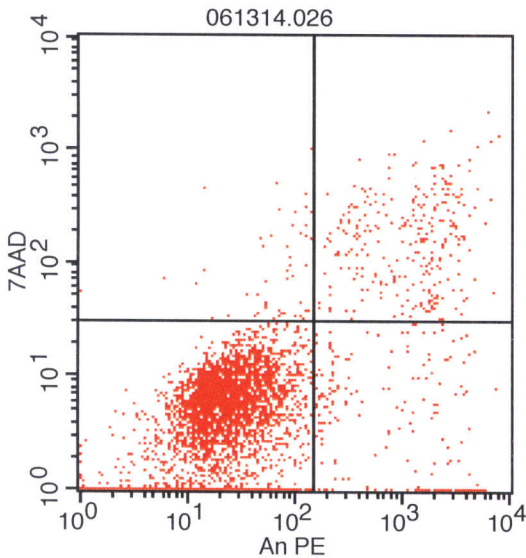

File: 061314.026  
 Sample ID:  
 Acquisition Date: 13-Jun-14  
 Gated Events: 19961  
 X Parameter: GFP (Log)  
 Quad Location: 11, 145  
 Log Data Units: Linear Values  
 Patient ID:  
 Gate: G1  
 Total Events: 20000  
 Y Parameter: An PE (Log)

| Quad | Events | % Gated | % Total | X Mean  | X Geo Mean | Y Mean  | Y Geo Mean |
|------|--------|---------|---------|---------|------------|---------|------------|
| UL   | 1959   | 9.81    | 9.79    | 3.23    | 2.63       | 1496.41 | 956.05     |
| UR   | 694    | 3.48    | 3.47    | 340.14  | 83.04      | 1302.05 | 779.20     |
| LL   | 11245  | 56.33   | 56.23   | 2.50    | 2.04       | 31.04   | 24.08      |
| LR   | 6063   | 30.37   | 30.31   | 1201.95 | 373.03     | 23.04   | 13.41      |

File: 061314.026  
 Sample ID:  
 Acquisition Date: 13-Jun-14  
 Gated Events: 19961  
 X Parameter: An PE (Log)  
 Quad Location: 149, 30  
 Log Data Units: Linear Values  
 Patient ID:  
 Gate: G1  
 Total Events: 20000  
 Y Parameter: 7AAD (Log)

| Quad | Events | % Gated | % Total | X Mean  | X Geo Mean | Y Mean | Y Geo Mean |
|------|--------|---------|---------|---------|------------|--------|------------|
| UL   | 291    | 1.46    | 1.46    | 79.07   | 66.19      | 134.89 | 89.66      |
| UR   | 1511   | 7.57    | 7.56    | 1537.25 | 1041.02    | 241.56 | 166.17     |
| LL   | 17048  | 85.41   | 85.24   | 27.58   | 19.28      | 5.68   | 4.01       |
| LR   | 1111   | 5.57    | 5.56    | 1357.10 | 789.48     | 7.41   | 3.98       |



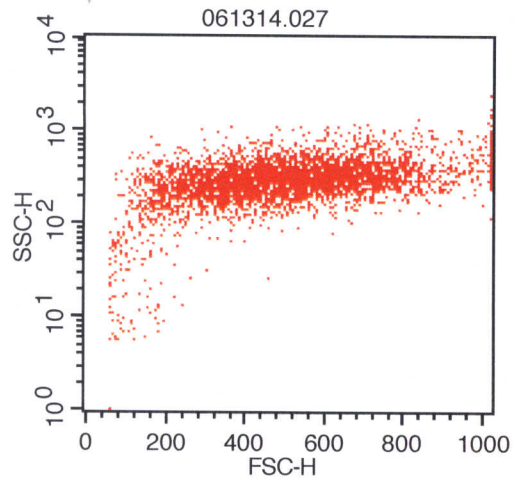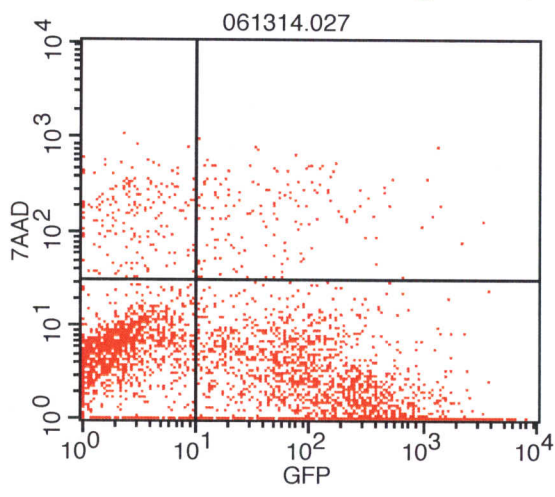

File: 061314.027  
 Sample ID:  
 Acquisition Date: 13-Jun-14  
 Gated Events: 20000  
 X Parameter: FSC-H (Linear)

| Region | Events | % Gated | % Total |
|--------|--------|---------|---------|
| R2     | 4      | 0.02    |         |

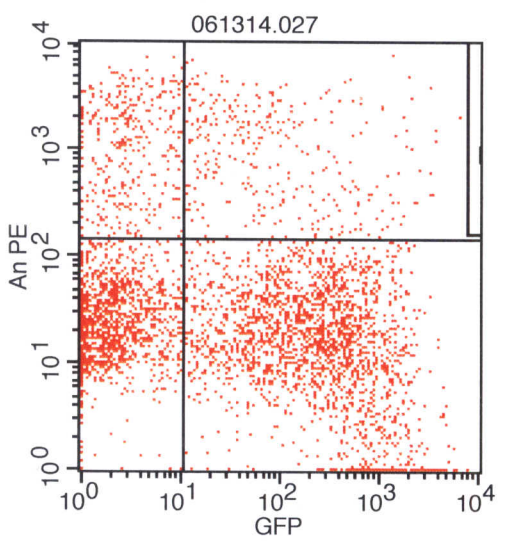

File: 061314.027  
 Sample ID:  
 Acquisition Date: 13-Jun-14  
 Gated Events: 19996  
 X Parameter: GFP (Log)  
 Quad Location: 10, 30

Log Data Units: Linear Values  
 Patient ID:  
 Gate: G1  
 Total Events: 20000  
 Y Parameter: 7AAD (Log)

| Quad | Events | % Gated | % Total | X Mean | X Geo Mean | Y Mean | Y Geo Mean |
|------|--------|---------|---------|--------|------------|--------|------------|
| UL   | 883    | 4.42    | 4.42    | 3.39   | 2.78       | 189.56 | 140.63     |
| UR   | 780    | 3.90    | 3.90    | 208.64 | 54.51      | 192.05 | 142.37     |
| LL   | 6787   | 33.94   | 33.93   | 2.77   | 2.22       | 5.94   | 4.60       |
| LR   | 11546  | 57.74   | 57.73   | 493.63 | 202.09     | 3.16   | 2.05       |

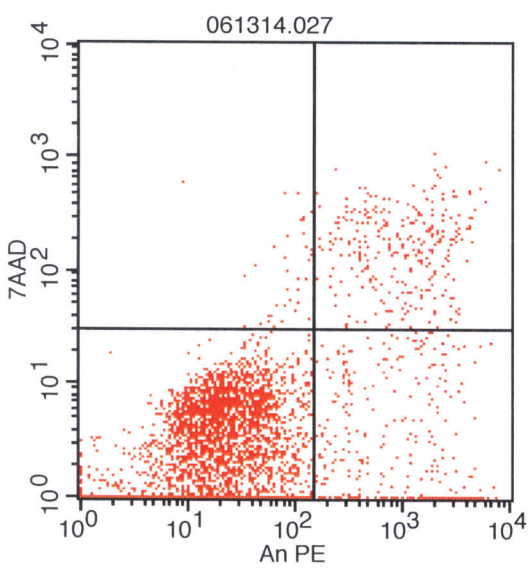

File: 061314.027  
 Sample ID:  
 Acquisition Date: 13-Jun-14  
 Gated Events: 19996  
 X Parameter: GFP (Log)  
 Quad Location: 11, 145

Log Data Units: Linear Values  
 Patient ID:  
 Gate: G1  
 Total Events: 20000  
 Y Parameter: An PE (Log)

| Quad | Events | % Gated | % Total | X Mean | X Geo Mean | Y Mean  | Y Geo Mean |
|------|--------|---------|---------|--------|------------|---------|------------|
| UL   | 1821   | 9.11    | 9.11    | 3.60   | 2.89       | 1724.51 | 1095.68    |
| UR   | 1629   | 8.15    | 8.14    | 339.91 | 88.52      | 1480.82 | 908.04     |
| LL   | 5992   | 29.97   | 29.96   | 2.79   | 2.20       | 31.93   | 23.09      |
| LR   | 10554  | 52.78   | 52.77   | 502.84 | 216.94     | 25.67   | 14.42      |

File: 061314.027  
 Sample ID:  
 Acquisition Date: 13-Jun-14  
 Gated Events: 19996  
 X Parameter: An PE (Log)  
 Quad Location: 149, 30

Log Data Units: Linear Values  
 Patient ID:  
 Gate: G1  
 Total Events: 20000  
 Y Parameter: 7AAD (Log)

| Quad | Events | % Gated | % Total | X Mean  | X Geo Mean | Y Mean | Y Geo Mean |
|------|--------|---------|---------|---------|------------|--------|------------|
| UL   | 167    | 0.84    | 0.83    | 77.34   | 59.85      | 158.46 | 110.07     |
| UR   | 1491   | 7.46    | 7.46    | 1471.40 | 1027.14    | 194.88 | 146.23     |
| LL   | 16406  | 82.05   | 82.03   | 27.63   | 16.94      | 4.00   | 2.75       |
| LR   | 1932   | 9.66    | 9.66    | 1736.42 | 1010.96    | 5.91   | 2.91       |

EV 51- 07297

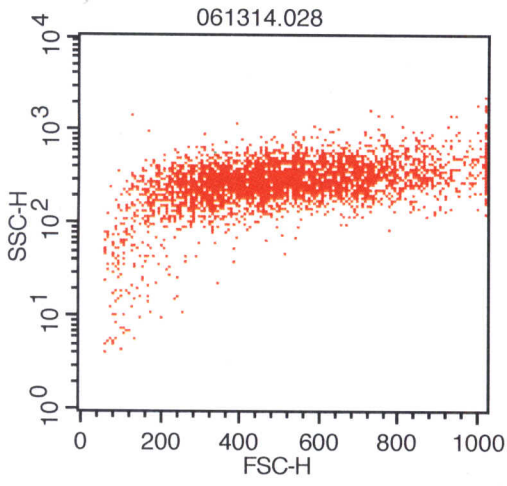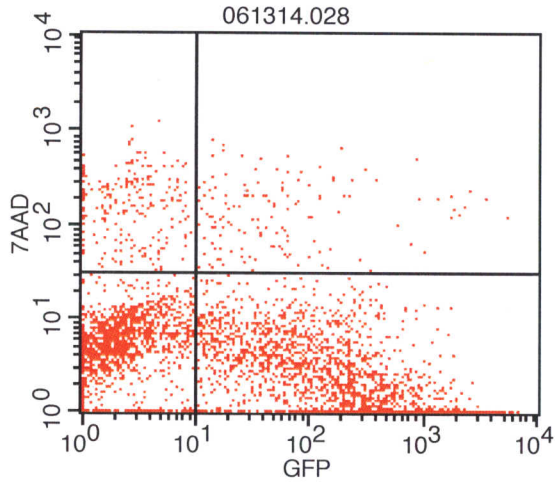

File: 061314.028  
 Sample ID:  
 Acquisition Date: 13-Jun-14  
 Gated Events: 20000  
 X Parameter: FSC-H (Linear)

| Region | Events | % Gated | % |
|--------|--------|---------|---|
| R2     | 1      | 0.01    |   |

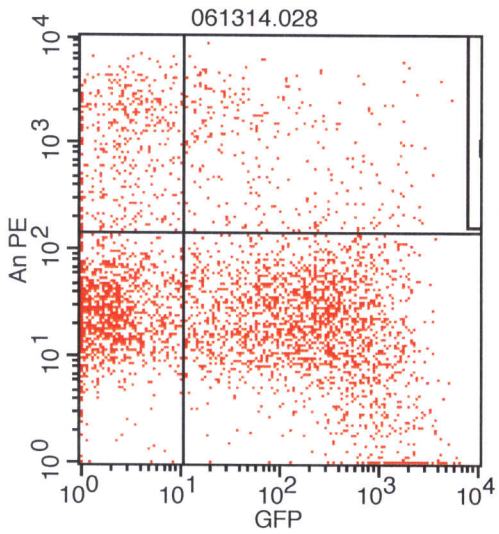

File: 061314.028  
 Sample ID:  
 Acquisition Date: 13-Jun-14  
 Gated Events: 19999  
 X Parameter: GFP (Log)  
 Quad Location: 10, 30

Log Data Units: Linear Values  
 Patient ID:  
 Gate: G1  
 Total Events: 20000  
 Y Parameter: 7AAD (Log)

| Quad | Events | % Gated | % Total | X Mean | X Geo Mean | Y Mean | Y Geo Mean |
|------|--------|---------|---------|--------|------------|--------|------------|
| UL   | 1088   | 5.44    | 5.44    | 3.49   | 2.81       | 192.47 | 143.55     |
| UR   | 802    | 4.01    | 4.01    | 243.69 | 57.90      | 199.87 | 144.75     |
| LL   | 6703   | 33.52   | 33.52   | 2.77   | 2.22       | 6.26   | 4.90       |
| LR   | 11406  | 57.03   | 57.03   | 500.21 | 203.63     | 3.33   | 2.14       |

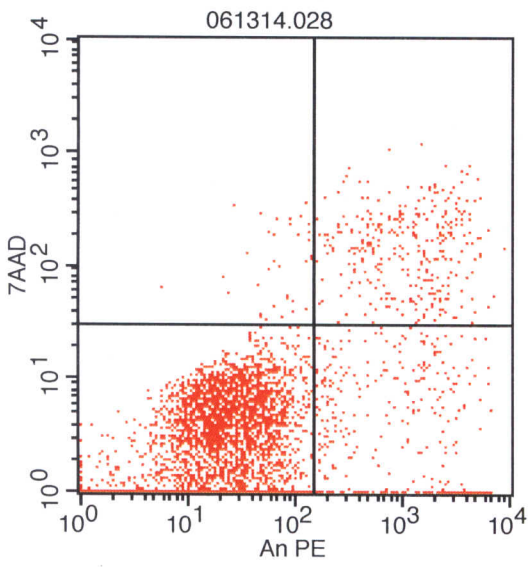

File: 061314.028  
 Sample ID:  
 Acquisition Date: 13-Jun-14  
 Gated Events: 19999  
 X Parameter: GFP (Log)  
 Quad Location: 11, 145

Log Data Units: Linear Values  
 Patient ID:  
 Gate: G1  
 Total Events: 20000  
 Y Parameter: An PE (Log)

| Quad | Events | % Gated | % Total | X Mean | X Geo Mean | Y Mean  | Y Geo Mean |
|------|--------|---------|---------|--------|------------|---------|------------|
| UL   | 1994   | 9.97    | 9.97    | 3.64   | 2.90       | 1684.47 | 1060.96    |
| UR   | 1646   | 8.23    | 8.23    | 387.86 | 100.10     | 1461.33 | 868.14     |
| LL   | 5919   | 29.60   | 29.59   | 2.77   | 2.19       | 32.42   | 23.46      |
| LR   | 10440  | 52.20   | 52.20   | 503.94 | 214.12     | 27.55   | 16.49      |

File: 061314.028  
 Sample ID:  
 Acquisition Date: 13-Jun-14  
 Gated Events: 19999  
 X Parameter: An PE (Log)  
 Quad Location: 149, 30

Log Data Units: Linear Values  
 Patient ID:  
 Gate: G1  
 Total Events: 20000  
 Y Parameter: 7AAD (Log)

| Quad | Events | % Gated | % Total | X Mean  | X Geo Mean | Y Mean | Y Geo Mean |
|------|--------|---------|---------|---------|------------|--------|------------|
| UL   | 169    | 0.85    | 0.84    | 78.87   | 66.42      | 180.12 | 124.23     |
| UR   | 1715   | 8.58    | 8.58    | 1547.61 | 1058.49    | 197.72 | 146.98     |
| LL   | 16218  | 81.09   | 81.09   | 29.00   | 18.56      | 4.19   | 2.87       |
| LR   | 1897   | 9.49    | 9.49    | 1637.27 | 919.76     | 6.40   | 3.31       |



EV 571 Q2294

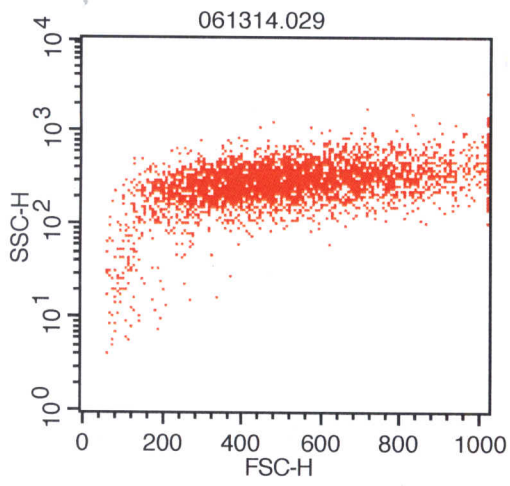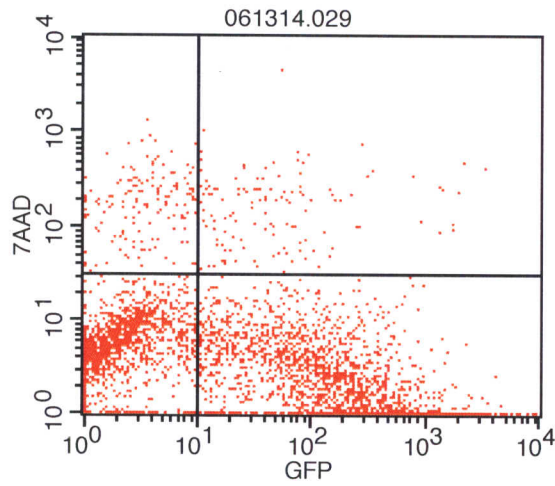

File: 061314.029  
 Sample ID:  
 Acquisition Date: 13-Jun-14  
 Gated Events: 20000  
 X Parameter: FSC-H (Linear)

| Region | Events | % Gated | % Total |
|--------|--------|---------|---------|
| R2     | 1      | 0.01    |         |

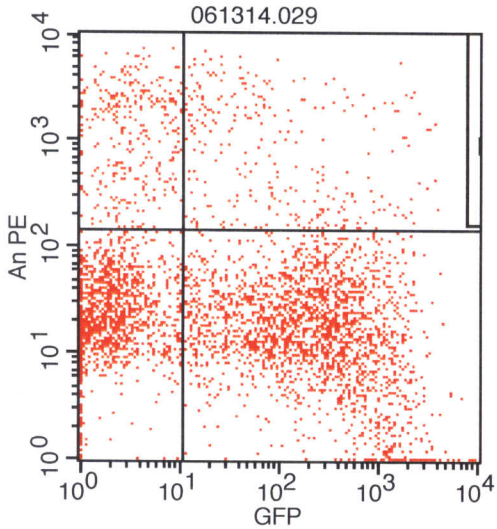

File: 061314.029  
 Sample ID:  
 Acquisition Date: 13-Jun-14  
 Gated Events: 19999  
 X Parameter: GFP (Log)  
 Quad Location: 10, 30  
 Log Data Units: Linear Values  
 Patient ID:  
 Gate: G1  
 Total Events: 20000  
 Y Parameter: 7AAD (Log)

| Quad | Events | % Gated | % Total | X Mean | X Geo Mean | Y Mean | Y Geo Mean |
|------|--------|---------|---------|--------|------------|--------|------------|
| UL   | 904    | 4.52    | 4.52    | 3.55   | 2.87       | 202.72 | 144.80     |
| UR   | 786    | 3.93    | 3.93    | 240.44 | 59.22      | 204.58 | 139.63     |
| LL   | 6655   | 33.28   | 33.27   | 2.81   | 2.25       | 6.28   | 4.88       |
| LR   | 11654  | 58.27   | 58.27   | 500.18 | 199.86     | 3.29   | 2.11       |

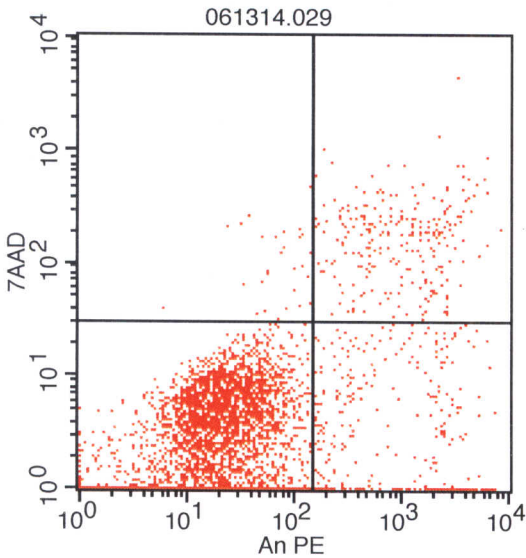

File: 061314.029  
 Sample ID:  
 Acquisition Date: 13-Jun-14  
 Gated Events: 19999  
 X Parameter: GFP (Log)  
 Quad Location: 11, 145  
 Log Data Units: Linear Values  
 Patient ID:  
 Gate: G1  
 Total Events: 20000  
 Y Parameter: An PE (Log)

| Quad | Events | % Gated | % Total | X Mean | X Geo Mean | Y Mean  | Y Geo Mean |
|------|--------|---------|---------|--------|------------|---------|------------|
| UL   | 1766   | 8.83    | 8.83    | 3.71   | 2.97       | 1731.05 | 1095.37    |
| UR   | 1653   | 8.27    | 8.27    | 377.68 | 99.54      | 1480.63 | 861.64     |
| LL   | 5925   | 29.63   | 29.62   | 2.83   | 2.23       | 31.58   | 22.77      |
| LR   | 10655  | 53.28   | 53.27   | 506.10 | 211.18     | 25.89   | 15.27      |

File: 061314.029  
 Sample ID:  
 Acquisition Date: 13-Jun-14  
 Gated Events: 19999  
 X Parameter: An PE (Log)  
 Quad Location: 149, 30  
 Log Data Units: Linear Values  
 Patient ID:  
 Gate: G1  
 Total Events: 20000  
 Y Parameter: 7AAD (Log)

| Quad | Events | % Gated | % Total | X Mean  | X Geo Mean | Y Mean | Y Geo Mean |
|------|--------|---------|---------|---------|------------|--------|------------|
| UL   | 198    | 0.99    | 0.99    | 75.56   | 60.04      | 150.24 | 106.67     |
| UR   | 1488   | 7.44    | 7.44    | 1546.59 | 1050.96    | 211.15 | 148.57     |
| LL   | 16419  | 82.10   | 82.09   | 27.61   | 17.44      | 4.18   | 2.83       |
| LR   | 1894   | 9.47    | 9.47    | 1688.34 | 954.40     | 6.13   | 3.14       |

878 572 Q7254

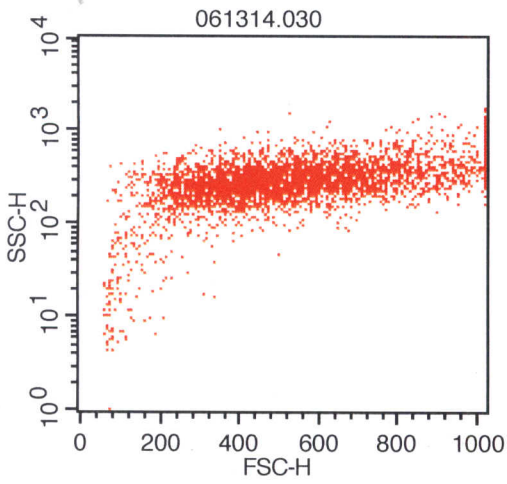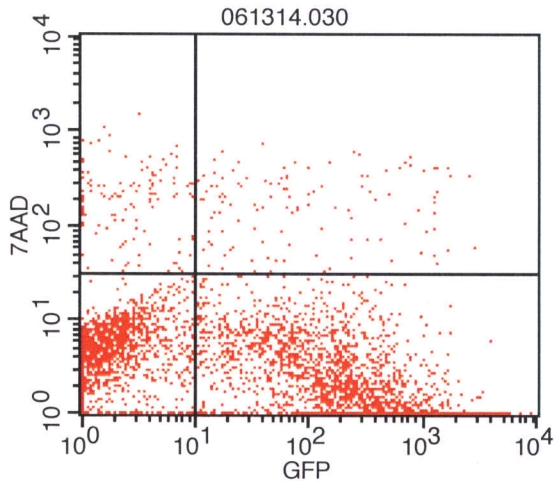

File: 061314.030  
 Sample ID:  
 Acquisition Date: 13-Jun-14  
 Gated Events: 20000  
 X Parameter: FSC-H (Linear)

| Region | Events | % Gated | % |
|--------|--------|---------|---|
| R2     | 4      | 0.02    |   |

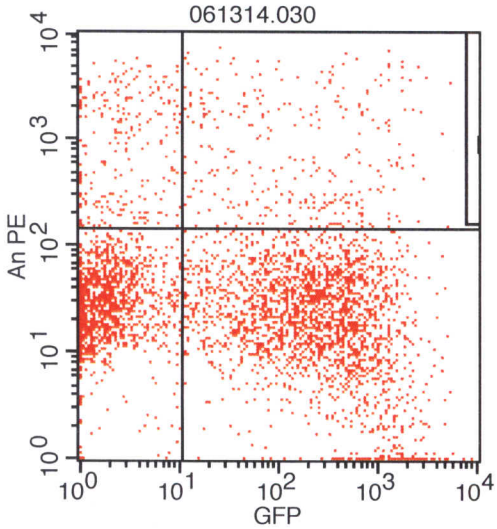

File: 061314.030  
 Sample ID:  
 Acquisition Date: 13-Jun-14  
 Gated Events: 19996  
 X Parameter: GFP (Log)  
 Quad Location: 10, 30  
 Log Data Units: Linear Values  
 Patient ID:  
 Gate: G1  
 Total Events: 20000  
 Y Parameter: 7AAD (Log)

| Quad | Events | % Gated | % Total | X Mean | X Geo Mean | Y Mean | Y Geo Mean |
|------|--------|---------|---------|--------|------------|--------|------------|
| UL   | 613    | 3.07    | 3.06    | 3.30   | 2.57       | 231.44 | 167.88     |
| UR   | 585    | 2.93    | 2.93    | 302.66 | 88.23      | 217.93 | 147.65     |
| LL   | 6388   | 31.95   | 31.94   | 2.54   | 2.06       | 5.74   | 4.64       |
| LR   | 12410  | 62.06   | 62.05   | 538.56 | 231.55     | 3.12   | 2.06       |

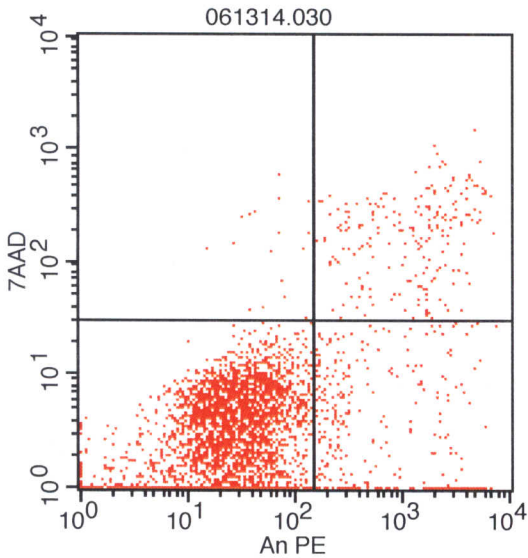

File: 061314.030  
 Sample ID:  
 Acquisition Date: 13-Jun-14  
 Gated Events: 19996  
 X Parameter: GFP (Log)  
 Quad Location: 11, 145  
 Log Data Units: Linear Values  
 Patient ID:  
 Gate: G1  
 Total Events: 20000  
 Y Parameter: An PE (Log)

| Quad | Events | % Gated | % Total | X Mean | X Geo Mean | Y Mean  | Y Geo Mean |
|------|--------|---------|---------|--------|------------|---------|------------|
| UL   | 1229   | 6.15    | 6.14    | 3.43   | 2.69       | 1565.21 | 880.32     |
| UR   | 1539   | 7.70    | 7.70    | 439.23 | 136.58     | 1494.71 | 796.55     |
| LL   | 5847   | 29.24   | 29.23   | 2.53   | 2.03       | 36.00   | 26.85      |
| LR   | 11381  | 56.92   | 56.90   | 543.35 | 241.56     | 29.47   | 17.45      |

File: 061314.030  
 Sample ID:  
 Acquisition Date: 13-Jun-14  
 Gated Events: 19996  
 X Parameter: An PE (Log)  
 Quad Location: 149, 30  
 Log Data Units: Linear Values  
 Patient ID:  
 Gate: G1  
 Total Events: 20000  
 Y Parameter: 7AAD (Log)

| Quad | Events | % Gated | % Total | X Mean  | X Geo Mean | Y Mean | Y Geo Mean |
|------|--------|---------|---------|---------|------------|--------|------------|
| UL   | 118    | 0.59    | 0.59    | 82.17   | 66.33      | 158.98 | 114.30     |
| UR   | 1075   | 5.38    | 5.38    | 1725.89 | 1111.57    | 232.98 | 164.61     |
| LL   | 17141  | 85.72   | 85.70   | 31.55   | 20.11      | 3.86   | 2.69       |
| LR   | 1662   | 8.31    | 8.31    | 1422.44 | 713.51     | 5.66   | 2.99       |



871 511 Q72 q8

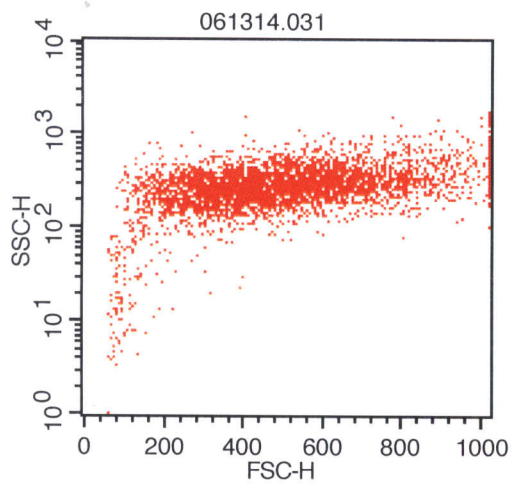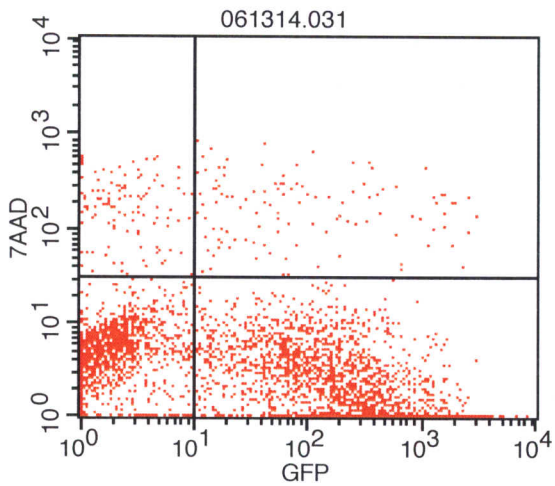

File: 061314.031  
 Sample ID:  
 Acquisition Date: 13-Jun-14  
 Gated Events: 20000  
 X Parameter: FSC-H (Linear)

| Region | Events | % Gated | % |
|--------|--------|---------|---|
| R2     | 0      | 0.00    |   |

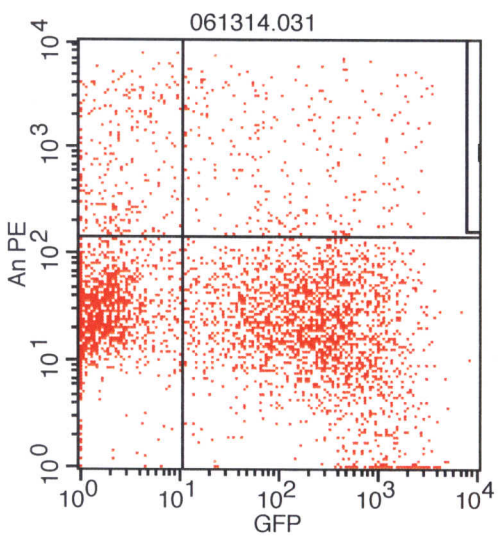

File: 061314.031  
 Sample ID:  
 Acquisition Date: 13-Jun-14  
 Gated Events: 20000  
 X Parameter: GFP (Log)  
 Quad Location: 10, 30

Log Data Units: Linear Values  
 Patient ID:  
 Gate: G1  
 Total Events: 20000  
 Y Parameter: 7AAD (Log)

| Quad | Events | % Gated | % Total | X Mean | X Geo Mean | Y Mean | Y Geo Mean |
|------|--------|---------|---------|--------|------------|--------|------------|
| UL   | 581    | 2.90    | 2.90    | 3.23   | 2.56       | 221.52 | 165.01     |
| UR   | 588    | 2.94    | 2.94    | 346.79 | 90.67      | 208.97 | 154.96     |
| LL   | 6231   | 31.16   | 31.16   | 2.48   | 2.02       | 5.80   | 4.65       |
| LR   | 12600  | 63.00   | 63.00   | 528.09 | 231.23     | 3.01   | 2.02       |

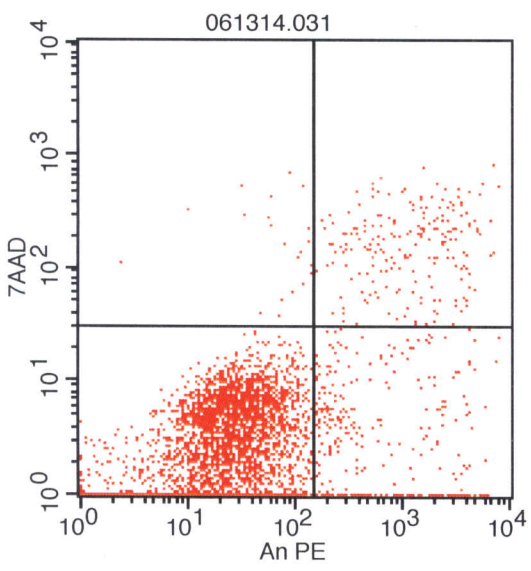

File: 061314.031  
 Sample ID:  
 Acquisition Date: 13-Jun-14  
 Gated Events: 20000  
 X Parameter: GFP (Log)  
 Quad Location: 11, 145

Log Data Units: Linear Values  
 Patient ID:  
 Gate: G1  
 Total Events: 20000  
 Y Parameter: An PE (Log)

| Quad | Events | % Gated | % Total | X Mean | X Geo Mean | Y Mean  | Y Geo Mean |
|------|--------|---------|---------|--------|------------|---------|------------|
| UL   | 1173   | 5.87    | 5.87    | 3.56   | 2.79       | 1545.44 | 900.96     |
| UR   | 1415   | 7.07    | 7.07    | 466.77 | 147.83     | 1514.40 | 811.86     |
| LL   | 5728   | 28.64   | 28.64   | 2.46   | 1.98       | 34.85   | 25.89      |
| LR   | 11684  | 58.42   | 58.42   | 530.33 | 238.44     | 29.34   | 17.22      |

File: 061314.031  
 Sample ID:  
 Acquisition Date: 13-Jun-14  
 Gated Events: 20000  
 X Parameter: An PE (Log)  
 Quad Location: 149, 30

Log Data Units: Linear Values  
 Patient ID:  
 Gate: G1  
 Total Events: 20000  
 Y Parameter: 7AAD (Log)

| Quad | Events | % Gated | % Total | X Mean  | X Geo Mean | Y Mean | Y Geo Mean |
|------|--------|---------|---------|---------|------------|--------|------------|
| UL   | 115    | 0.57    | 0.57    | 84.53   | 71.04      | 160.52 | 113.21     |
| UR   | 1051   | 5.25    | 5.25    | 1729.35 | 1126.52    | 221.72 | 166.82     |
| LL   | 17321  | 86.61   | 86.61   | 30.96   | 19.58      | 3.78   | 2.63       |
| LR   | 1513   | 7.56    | 7.56    | 1410.84 | 720.25     | 5.69   | 3.06       |

87P 5m Q729V

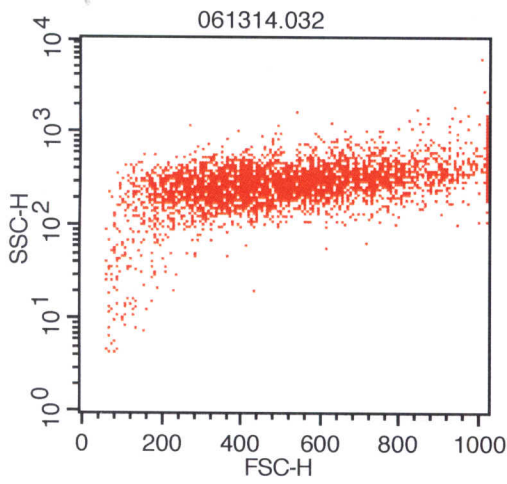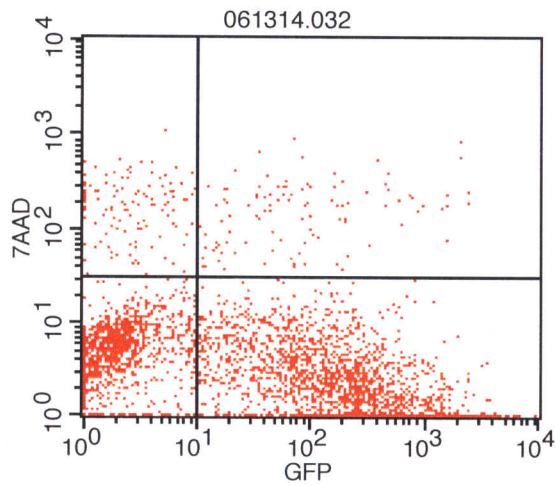

File: 061314.032  
 Sample ID:  
 Acquisition Date: 13-Jun-14  
 Gated Events: 20000  
 X Parameter: FSC-H (Linear)

| Region | Events | % Gated | % |
|--------|--------|---------|---|
| R2     | 1      | 0.01    |   |

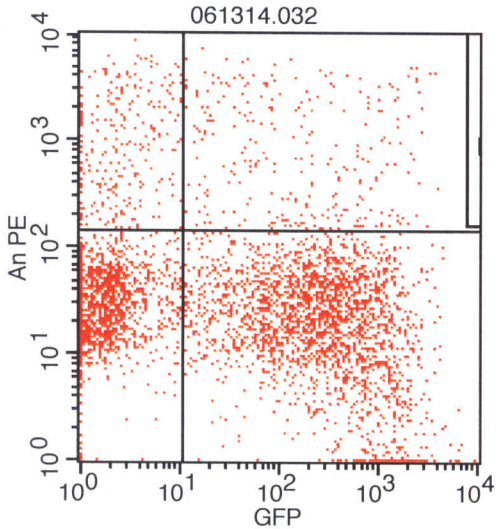

File: 061314.032  
 Sample ID:  
 Acquisition Date: 13-Jun-14  
 Gated Events: 19999  
 X Parameter: GFP (Log)  
 Quad Location: 10, 30  
 Log Data Units: Linear Values  
 Patient ID:  
 Gate: G1  
 Total Events: 20000  
 Y Parameter: 7AAD (Log)

| Quad | Events | % Gated | % Total | X Mean | X Geo Mean | Y Mean | Y Geo Mean |
|------|--------|---------|---------|--------|------------|--------|------------|
| UL   | 647    | 3.24    | 3.23    | 3.32   | 2.63       | 204.12 | 156.85     |
| UR   | 571    | 2.86    | 2.85    | 335.98 | 85.43      | 189.63 | 135.86     |
| LL   | 6283   | 31.42   | 31.41   | 2.48   | 2.01       | 5.69   | 4.60       |
| LR   | 12498  | 62.49   | 62.49   | 536.80 | 232.03     | 3.07   | 2.04       |

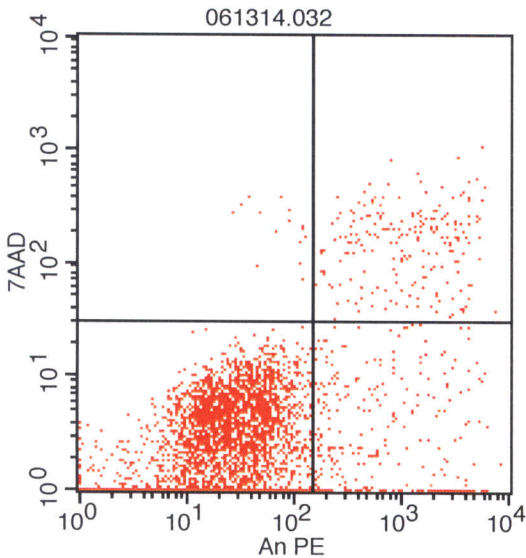

File: 061314.032  
 Sample ID:  
 Acquisition Date: 13-Jun-14  
 Gated Events: 19999  
 X Parameter: GFP (Log)  
 Quad Location: 11, 145  
 Log Data Units: Linear Values  
 Patient ID:  
 Gate: G1  
 Total Events: 20000  
 Y Parameter: An PE (Log)

| Quad | Events | % Gated | % Total | X Mean | X Geo Mean | Y Mean  | Y Geo Mean |
|------|--------|---------|---------|--------|------------|---------|------------|
| UL   | 1235   | 6.18    | 6.17    | 3.38   | 2.67       | 1479.20 | 864.55     |
| UR   | 1436   | 7.18    | 7.18    | 454.04 | 143.94     | 1426.41 | 752.23     |
| LL   | 5789   | 28.95   | 28.95   | 2.51   | 2.00       | 35.20   | 26.35      |
| LR   | 11539  | 57.70   | 57.69   | 541.45 | 240.38     | 29.89   | 17.51      |

File: 061314.032  
 Sample ID:  
 Acquisition Date: 13-Jun-14  
 Gated Events: 19999  
 X Parameter: An PE (Log)  
 Quad Location: 149, 30  
 Log Data Units: Linear Values  
 Patient ID:  
 Gate: G1  
 Total Events: 20000  
 Y Parameter: 7AAD (Log)

| Quad | Events | % Gated | % Total | X Mean  | X Geo Mean | Y Mean | Y Geo Mean |
|------|--------|---------|---------|---------|------------|--------|------------|
| UL   | 120    | 0.60    | 0.60    | 75.81   | 61.19      | 165.24 | 116.88     |
| UR   | 1092   | 5.46    | 5.46    | 1609.63 | 1017.92    | 201.77 | 151.64     |
| LL   | 17232  | 86.16   | 86.16   | 31.51   | 19.97      | 3.79   | 2.65       |
| LR   | 1555   | 7.78    | 7.78    | 1359.42 | 696.69     | 5.82   | 3.10       |



VH11 S7- Q72 98

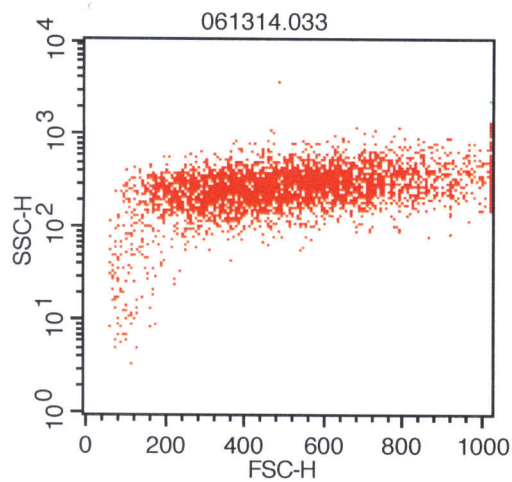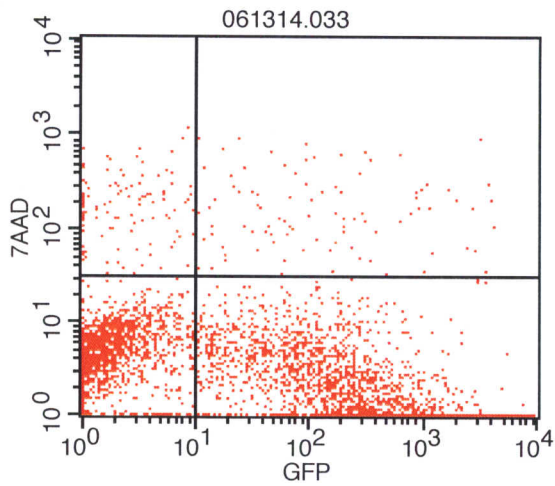

File: 061314.033  
 Sample ID:  
 Acquisition Date: 13-Jun-14  
 Gated Events: 20000  
 X Parameter: FSC-H (Linear)

| Region | Events | % Gated | % |
|--------|--------|---------|---|
| R2     | 4      | 0.02    |   |

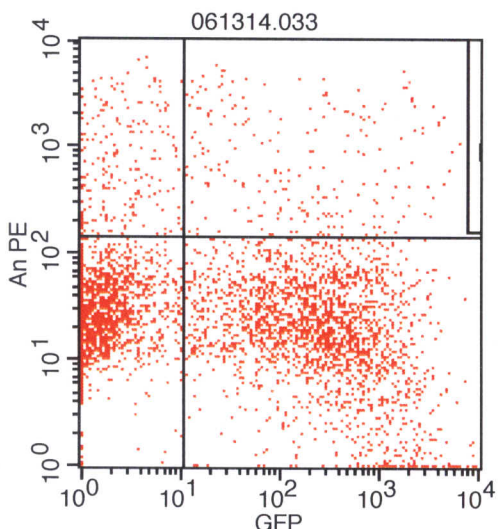

File: 061314.033  
 Sample ID:  
 Acquisition Date: 13-Jun-14  
 Gated Events: 19996  
 X Parameter: GFP (Log)  
 Quad Location: 10, 30

Log Data Units: Linear Values  
 Patient ID:  
 Gate: G1  
 Total Events: 20000  
 Y Parameter: 7AAD (Log)

| Quad | Events | % Gated | % Total | X Mean | X Geo Mean | Y Mean | Y Geo Mean |
|------|--------|---------|---------|--------|------------|--------|------------|
| UL   | 567    | 2.84    | 2.83    | 3.09   | 2.41       | 231.05 | 173.07     |
| UR   | 518    | 2.59    | 2.59    | 474.53 | 97.84      | 202.24 | 142.72     |
| LL   | 7131   | 35.66   | 35.66   | 2.27   | 1.85       | 5.61   | 4.58       |
| LR   | 11780  | 58.91   | 58.90   | 610.53 | 242.00     | 2.95   | 1.98       |

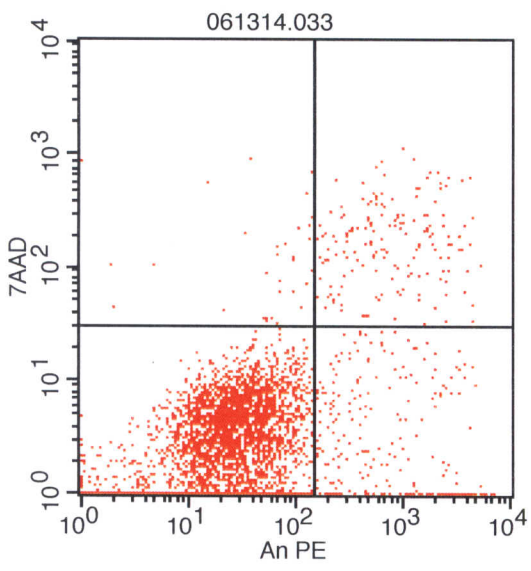

File: 061314.033  
 Sample ID:  
 Acquisition Date: 13-Jun-14  
 Gated Events: 19996  
 X Parameter: GFP (Log)  
 Quad Location: 11, 145

Log Data Units: Linear Values  
 Patient ID:  
 Gate: G1  
 Total Events: 20000  
 Y Parameter: An PE (Log)

| Quad | Events | % Gated | % Total | X Mean | X Geo Mean | Y Mean  | Y Geo Mean |
|------|--------|---------|---------|--------|------------|---------|------------|
| UL   | 1061   | 5.31    | 5.30    | 3.28   | 2.56       | 1311.36 | 741.68     |
| UR   | 1209   | 6.05    | 6.04    | 674.60 | 169.87     | 1310.01 | 728.62     |
| LL   | 6723   | 33.62   | 33.62   | 2.28   | 1.83       | 34.45   | 26.22      |
| LR   | 11003  | 55.03   | 55.02   | 601.78 | 247.11     | 27.93   | 16.43      |

File: 061314.033  
 Sample ID:  
 Acquisition Date: 13-Jun-14  
 Gated Events: 19996  
 X Parameter: An PE (Log)  
 Quad Location: 149, 30

Log Data Units: Linear Values  
 Patient ID:  
 Gate: G1  
 Total Events: 20000  
 Y Parameter: 7AAD (Log)

| Quad | Events | % Gated | % Total | X Mean  | X Geo Mean | Y Mean | Y Geo Mean |
|------|--------|---------|---------|---------|------------|--------|------------|
| UL   | 126    | 0.63    | 0.63    | 77.54   | 55.55      | 186.69 | 117.96     |
| UR   | 956    | 4.78    | 4.78    | 1397.78 | 906.57     | 221.92 | 164.88     |
| LL   | 17630  | 88.17   | 88.15   | 30.26   | 19.54      | 3.83   | 2.69       |
| LR   | 1284   | 6.42    | 6.42    | 1272.94 | 652.34     | 5.71   | 3.04       |

VH141 S7- Q72 9MP

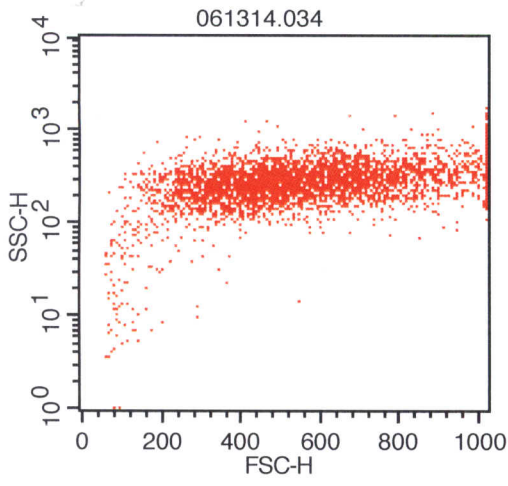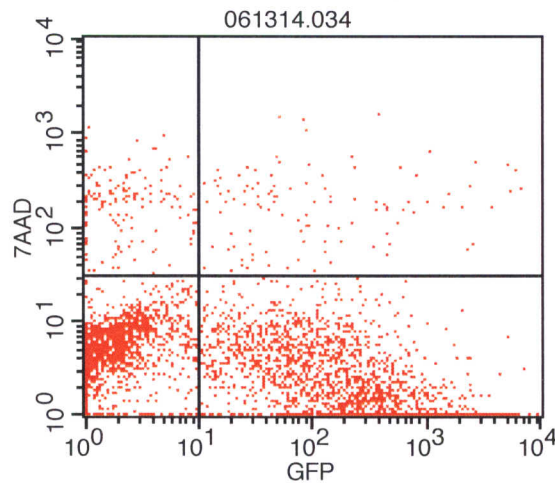

File: 061314.034  
 Sample ID:  
 Acquisition Date: 13-Jun-14  
 Gated Events: 20000  
 X Parameter: FSC-H (Linear)

| Region | Events | % Gated | % |
|--------|--------|---------|---|
| R2     | 9      | 0.04    |   |

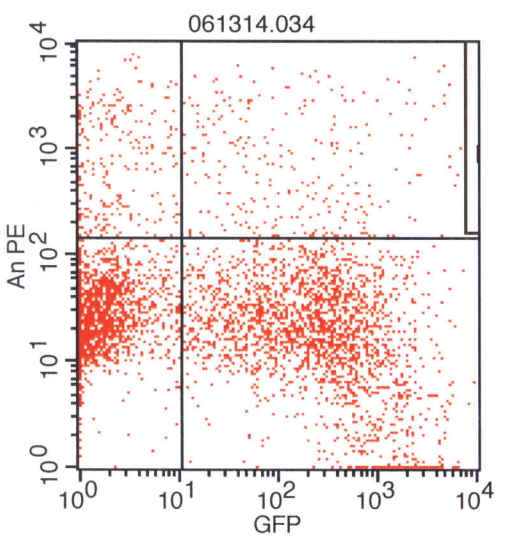

File: 061314.034  
 Sample ID:  
 Acquisition Date: 13-Jun-14  
 Gated Events: 19991  
 X Parameter: GFP (Log)  
 Quad Location: 10, 30

Log Data Units: Linear Values  
 Patient ID:  
 Gate: G1  
 Total Events: 20000  
 Y Parameter: 7AAD (Log)

| Quad | Events | % Gated | % Total | X Mean | X Geo Mean | Y Mean | Y Geo Mean |
|------|--------|---------|---------|--------|------------|--------|------------|
| UL   | 664    | 3.32    | 3.32    | 3.07   | 2.38       | 230.03 | 170.78     |
| UR   | 580    | 2.90    | 2.90    | 428.91 | 96.54      | 219.08 | 153.60     |
| LL   | 7174   | 35.89   | 35.87   | 2.30   | 1.88       | 5.82   | 4.76       |
| LR   | 11573  | 57.89   | 57.87   | 605.14 | 241.35     | 3.10   | 2.05       |

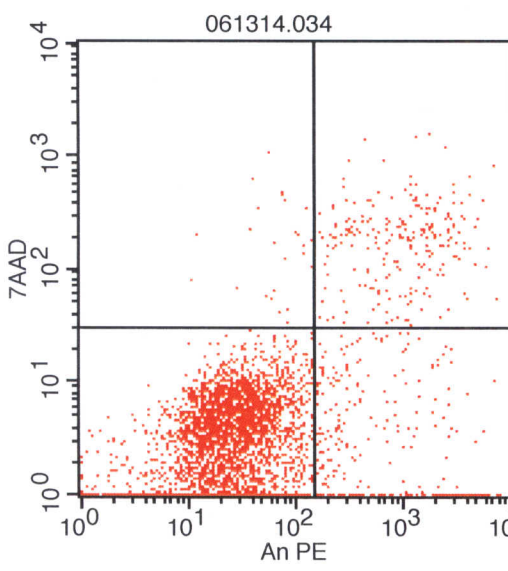

File: 061314.034  
 Sample ID:  
 Acquisition Date: 13-Jun-14  
 Gated Events: 19991  
 X Parameter: GFP (Log)  
 Quad Location: 11, 145

Log Data Units: Linear Values  
 Patient ID:  
 Gate: G1  
 Total Events: 20000  
 Y Parameter: An PE (Log)

| Quad | Events | % Gated | % Total | X Mean | X Geo Mean | Y Mean  | Y Geo Mean |
|------|--------|---------|---------|--------|------------|---------|------------|
| UL   | 1177   | 5.89    | 5.88    | 3.20   | 2.46       | 1416.34 | 795.29     |
| UR   | 1322   | 6.61    | 6.61    | 593.75 | 161.41     | 1344.24 | 759.74     |
| LL   | 6731   | 33.67   | 33.66   | 2.30   | 1.86       | 34.54   | 26.34      |
| LR   | 10761  | 53.83   | 53.80   | 600.90 | 246.36     | 28.44   | 16.80      |

File: 061314.034  
 Sample ID:  
 Acquisition Date: 13-Jun-14  
 Gated Events: 19991  
 X Parameter: An PE (Log)  
 Quad Location: 149, 30

Log Data Units: Linear Values  
 Patient ID:  
 Gate: G1  
 Total Events: 20000  
 Y Parameter: 7AAD (Log)

| Quad | Events | % Gated | % Total | X Mean  | X Geo Mean | Y Mean | Y Geo Mean |
|------|--------|---------|---------|---------|------------|--------|------------|
| UL   | 133    | 0.67    | 0.66    | 75.48   | 59.61      | 192.74 | 121.83     |
| UR   | 1106   | 5.53    | 5.53    | 1543.15 | 1001.02    | 229.67 | 169.56     |
| LL   | 17394  | 87.01   | 86.97   | 30.68   | 19.89      | 4.03   | 2.83       |
| LR   | 1358   | 6.79    | 6.79    | 1275.57 | 658.68     | 5.64   | 2.99       |



UHI4P 577 @ 72 g18

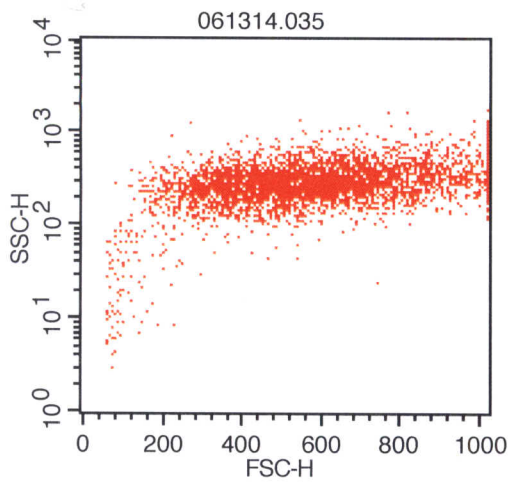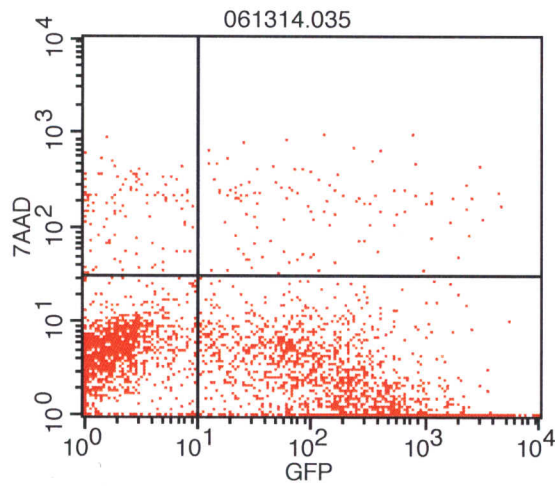

File: 061314.035  
 Sample ID:  
 Acquisition Date: 13-Jun-14  
 Gated Events: 20000  
 X Parameter: FSC-H (Linear)

| Region | Events | % Gated | % Total |
|--------|--------|---------|---------|
| R2     | 4      | 0.02    |         |

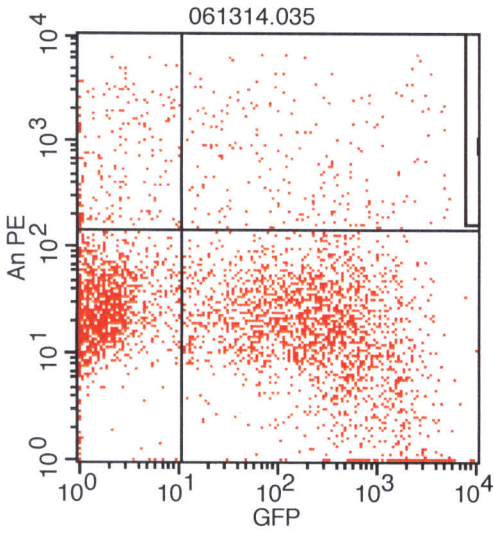

File: 061314.035  
 Sample ID:  
 Acquisition Date: 13-Jun-14  
 Gated Events: 19996  
 X Parameter: GFP (Log)  
 Quad Location: 10, 30

Log Data Units: Linear Values  
 Patient ID:  
 Gate: G1  
 Total Events: 20000  
 Y Parameter: 7AAD (Log)

| Quad | Events | % Gated | % Total | X Mean | X Geo Mean | Y Mean | Y Geo Mean |
|------|--------|---------|---------|--------|------------|--------|------------|
| UL   | 570    | 2.85    | 2.85    | 3.05   | 2.40       | 225.96 | 166.54     |
| UR   | 538    | 2.69    | 2.69    | 461.77 | 105.66     | 213.01 | 147.72     |
| LL   | 7333   | 36.67   | 36.66   | 2.31   | 1.90       | 5.46   | 4.47       |
| LR   | 11555  | 57.79   | 57.77   | 632.18 | 251.50     | 2.86   | 1.91       |

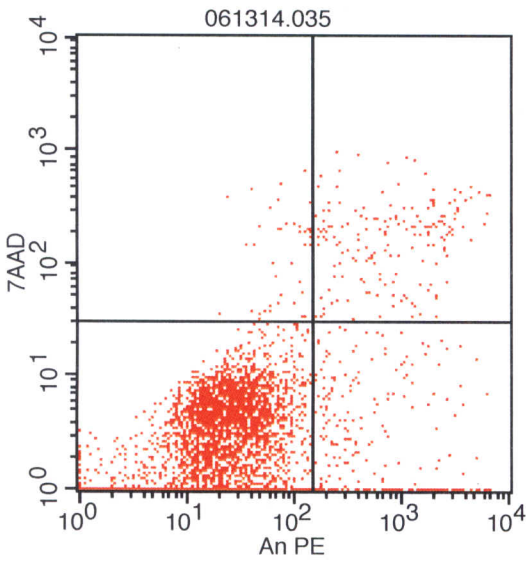

File: 061314.035  
 Sample ID:  
 Acquisition Date: 13-Jun-14  
 Gated Events: 19996  
 X Parameter: GFP (Log)  
 Quad Location: 11, 145

Log Data Units: Linear Values  
 Patient ID:  
 Gate: G1  
 Total Events: 20000  
 Y Parameter: An PE (Log)

| Quad | Events | % Gated | % Total | X Mean | X Geo Mean | Y Mean  | Y Geo Mean |
|------|--------|---------|---------|--------|------------|---------|------------|
| UL   | 975    | 4.88    | 4.88    | 3.35   | 2.59       | 1378.28 | 745.40     |
| UR   | 1117   | 5.59    | 5.58    | 636.00 | 171.37     | 1304.01 | 712.36     |
| LL   | 7007   | 35.04   | 35.03   | 2.31   | 1.89       | 33.04   | 24.90      |
| LR   | 10897  | 54.50   | 54.48   | 627.89 | 256.49     | 25.82   | 14.54      |

File: 061314.035  
 Sample ID:  
 Acquisition Date: 13-Jun-14  
 Gated Events: 19996  
 X Parameter: An PE (Log)  
 Quad Location: 149, 30

Log Data Units: Linear Values  
 Patient ID:  
 Gate: G1  
 Total Events: 20000  
 Y Parameter: 7AAD (Log)

| Quad | Events | % Gated | % Total | X Mean  | X Geo Mean | Y Mean | Y Geo Mean |
|------|--------|---------|---------|---------|------------|--------|------------|
| UL   | 206    | 1.03    | 1.03    | 78.64   | 62.51      | 168.15 | 121.09     |
| UR   | 899    | 4.50    | 4.50    | 1459.72 | 891.61     | 232.11 | 167.70     |
| LL   | 17730  | 88.67   | 88.65   | 28.28   | 17.76      | 3.78   | 2.64       |
| LR   | 1161   | 5.81    | 5.80    | 1277.70 | 649.59     | 5.37   | 2.85       |
