# Supplementary material for: Bifunctional Anti-Non-Amyloid Component α-Synuclein Nanobodies Are Protective In Situ
Source: PubMed Central journal article supplement (PMC5100967; doi:10.1371/journal.pone.0165964), 2016-11-08
Supplement: pone.0165964.s004.pdf [file pone.0165964.s004.pdf]

Feb 20 2014

ST14A - setHys

022014.001

022014.001

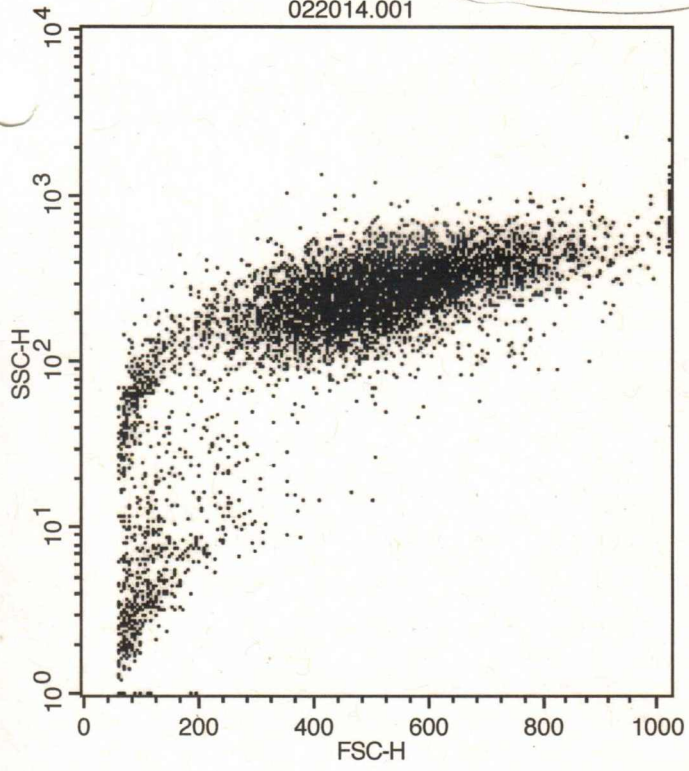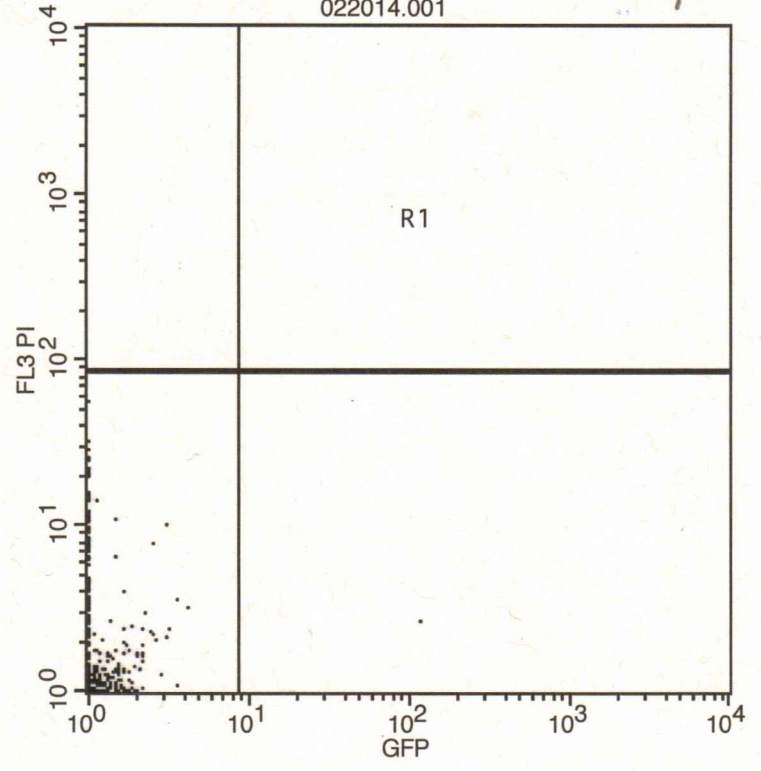

Quadrant Statistics

File: 022014.001  
 Sample ID:  
 Tube: Untitled  
 Acquisition Date: 20-Feb-14  
 Gated Events: 6690  
 X Parameter: GFP (Log)  
 Quad Location: 9, 83

Log Data Units: Linear Values  
 Patient ID:  
 Panel: Untitled Acquisition Tube List  
 Gate: No Gate  
 Total Events: 6690  
 Y Parameter: FL3 PI (Log)

| Quad | Events | % Gated | % Total | X Mean | X Geo Mean | Y Mean | Y Geo Mean |
|------|--------|---------|---------|--------|------------|--------|------------|
| UL   | 0      | 0.00    | 0.00    | ***    | ***        | ***    | ***        |
| UR   | 0      | 0.00    | 0.00    | ***    | ***        | ***    | ***        |
| LL   | 6689   | 99.99   | 99.99   | 1.01   | 1.01       | 1.12   | 1.05       |
| LR   | 1      | 0.01    | 0.01    | 119.71 | 119.71     | 2.64   | 2.64       |

GFP settings

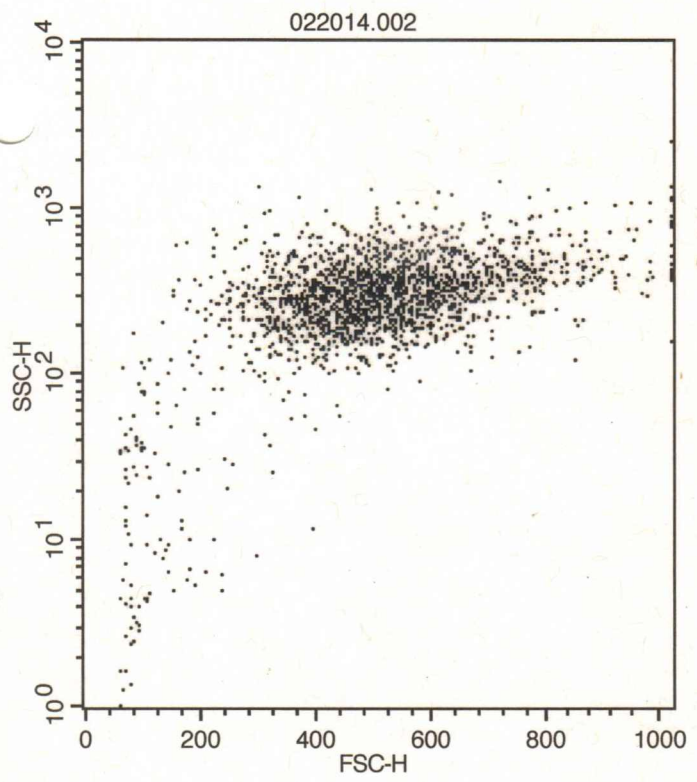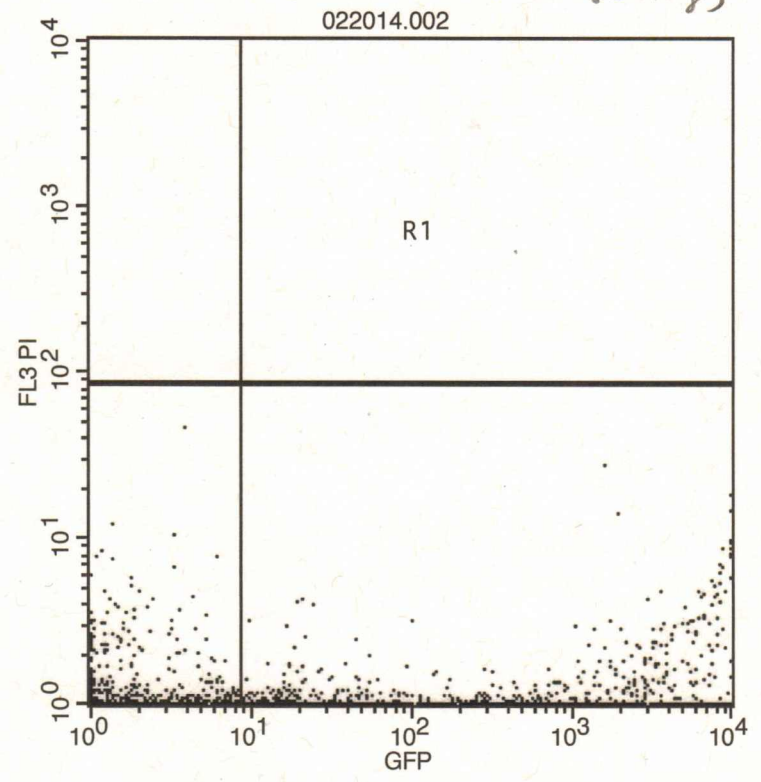

Quadrant Statistics

File: 022014.002  
 Sample ID:  
 Tube: Untitled  
 Acquisition Date: 20-Feb-14  
 Gated Events: 2100  
 X Parameter: GFP (Log)  
 Quad Location: 9, 83

Log Data Units: Linear Values  
 Patient ID:  
 Panel: Untitled Acquisition Tube List  
 Gate: No Gate  
 Total Events: 2100  
 Y Parameter: FL3 PI (Log)

| Quad | Events | % Gated | % Total | X Mean  | X Geo Mean | Y Mean | Y Geo Mean |
|------|--------|---------|---------|---------|------------|--------|------------|
| UL   | 0      | 0.00    | 0.00    | ***     | ***        | ***    | ***        |
| UR   | 0      | 0.00    | 0.00    | ***     | ***        | ***    | ***        |
| LL   | 996    | 47.43   | 47.43   | 2.33    | 1.80       | 1.29   | 1.15       |
| LR   | 1104   | 52.57   | 52.57   | 1558.96 | 330.03     | 1.33   | 1.16       |

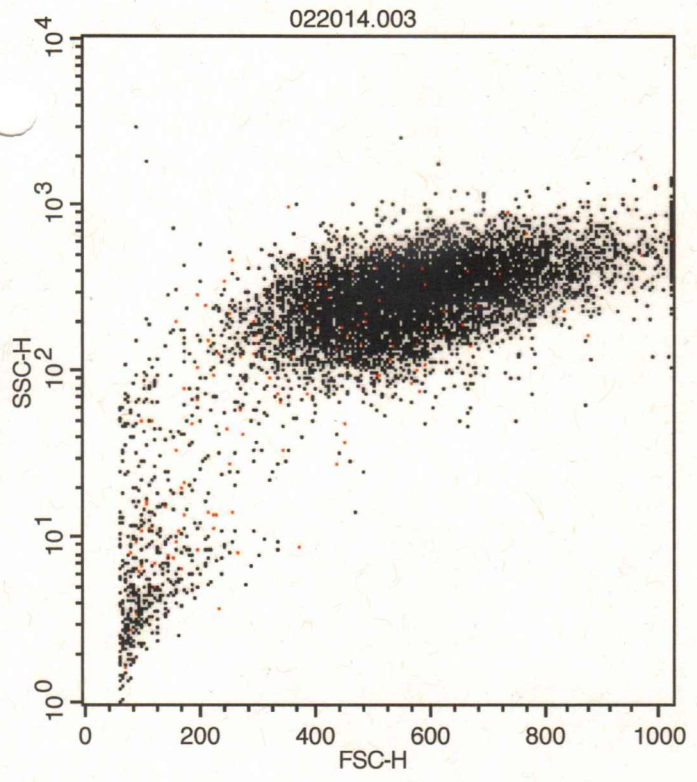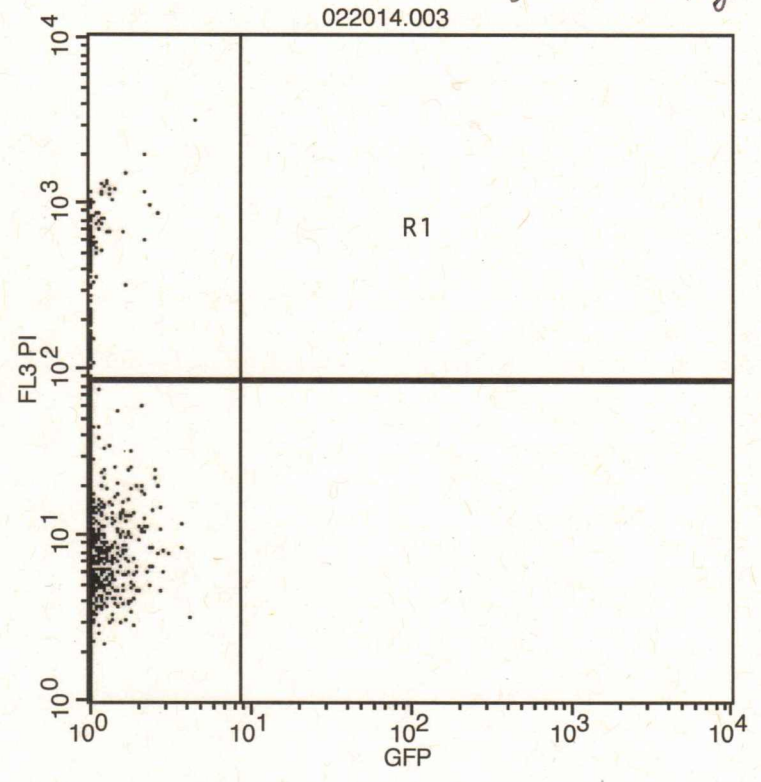

Quadrant Statistics

File: 022014.003  
 Sample ID:  
 Tube: Untitled  
 Acquisition Date: 20-Feb-14  
 Gated Events: 10000  
 X Parameter: GFP (Log)  
 Quad Location: 9, 83

Log Data Units: Linear Values  
 Patient ID:  
 Panel: Untitled Acquisition Tube List  
 Gate: No Gate  
 Total Events: 10000  
 Y Parameter: FL3 PI (Log)

| Quad | Events | % Gated | % Total | X Mean | X Geo Mean | Y Mean | Y Geo Mean |
|------|--------|---------|---------|--------|------------|--------|------------|
| UL   | 154    | 1.54    | 1.54    | 1.11   | 1.08       | 507.69 | 360.81     |
| UR   | 0      | 0.00    | 0.00    | ***    | ***        | ***    | ***        |
| LL   | 9846   | 98.46   | 98.46   | 1.01   | 1.01       | 5.61   | 4.46       |
| LR   | 0      | 0.00    | 0.00    | ***    | ***        | ***    | ***        |

ST14A Settings

022014.004

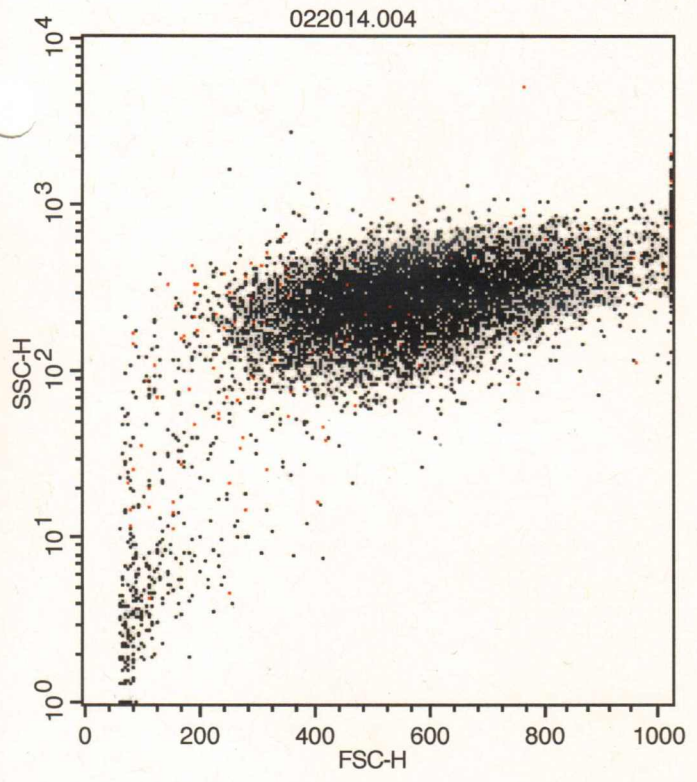

022014.004

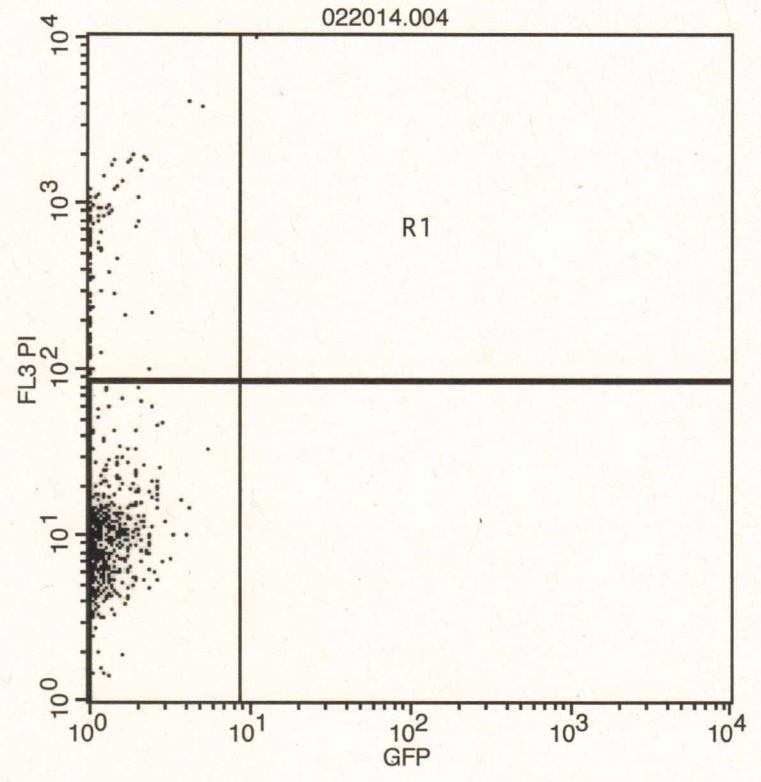

Quadrant Statistics

File: 022014.004                      Log Data Units: Linear Values  
 Sample ID:                              Patient ID:  
 Tube: Untitled                          Panel: Untitled Acquisition Tube List  
 Acquisition Date: 20-Feb-14          Gate: No Gate  
 Gated Events: 10000                    Total Events: 10000  
 X Parameter: GFP (Log)                Y Parameter: FL3 PI (Log)  
 Quad Location: 9, 83

| Quad | Events | % Gated | % Total | X Mean | X Geo Mean | Y Mean  | Y Geo Mean |
|------|--------|---------|---------|--------|------------|---------|------------|
| UL   | 133    | 1.33    | 1.33    | 1.21   | 1.15       | 620.22  | 418.20     |
| UR   | 1      | 0.01    | 0.01    | 10.75  | 10.75      | 9910.46 | 9910.46    |
| LL   | 9866   | 98.66   | 98.66   | 1.02   | 1.02       | 6.30    | 5.04       |
| LR   | 0      | 0.00    | 0.00    | ***    | ***        | ***     | ***        |

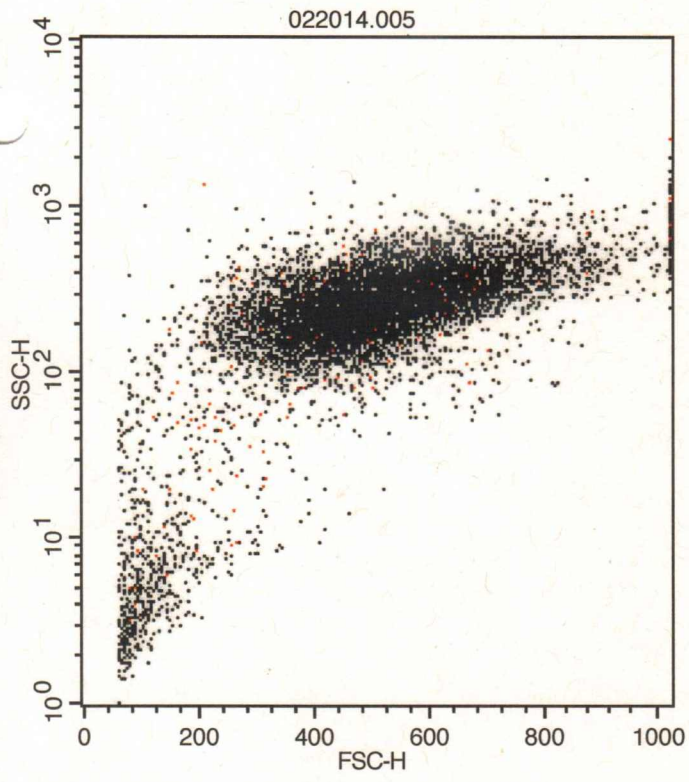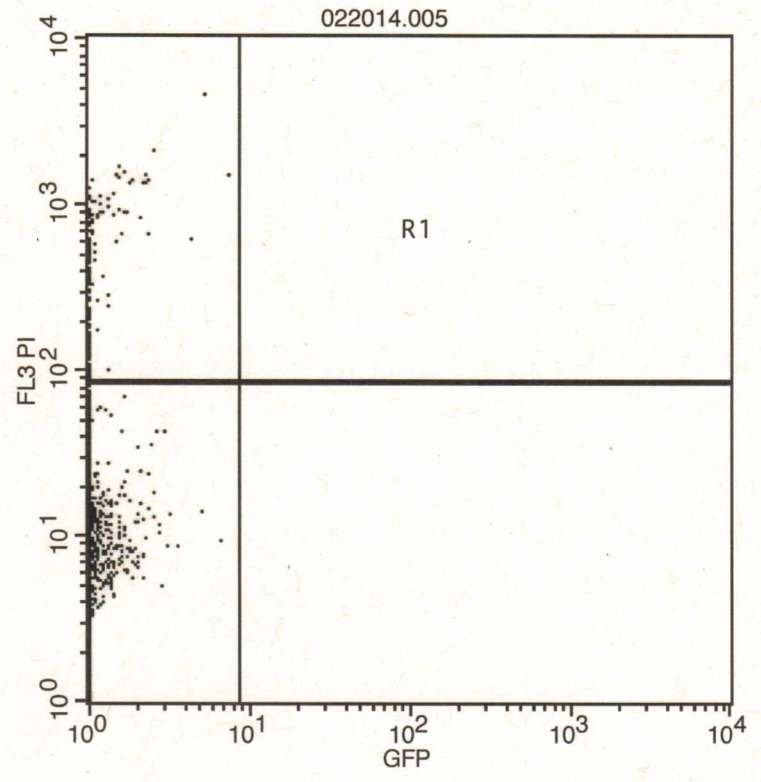

Quadrant Statistics

File: 022014.005  
 Sample ID:  
 Tube: Untitled  
 Acquisition Date: 20-Feb-14  
 Gated Events: 10000  
 X Parameter: GFP (Log)  
 Quad Location: 9, 83

Log Data Units: Linear Values  
 Patient ID:  
 Panel: Untitled Acquisition Tube List  
 Gate: No Gate  
 Total Events: 10000  
 Y Parameter: FL3 PI (Log)

| Quad | Events | % Gated | % Total | X Mean | X Geo Mean | Y Mean | Y Geo Mean |
|------|--------|---------|---------|--------|------------|--------|------------|
| UL   | 158    | 1.58    | 1.58    | 1.22   | 1.14       | 583.01 | 413.26     |
| UR   | 0      | 0.00    | 0.00    | ***    | ***        | ***    | ***        |
| LL   | 9842   | 98.42   | 98.42   | 1.01   | 1.01       | 6.45   | 5.23       |
| LR   | 0      | 0.00    | 0.00    | ***    | ***        | ***    | ***        |

022014.006

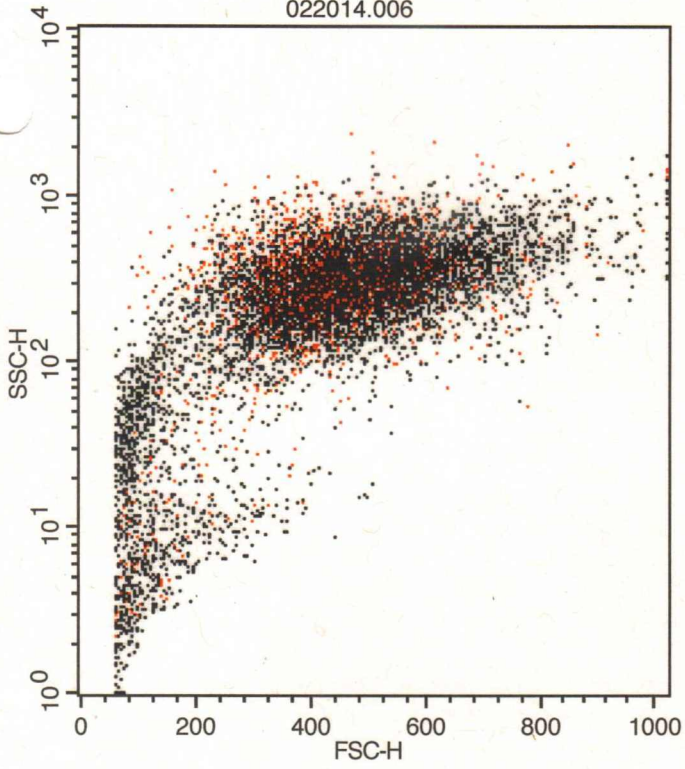

022014.006

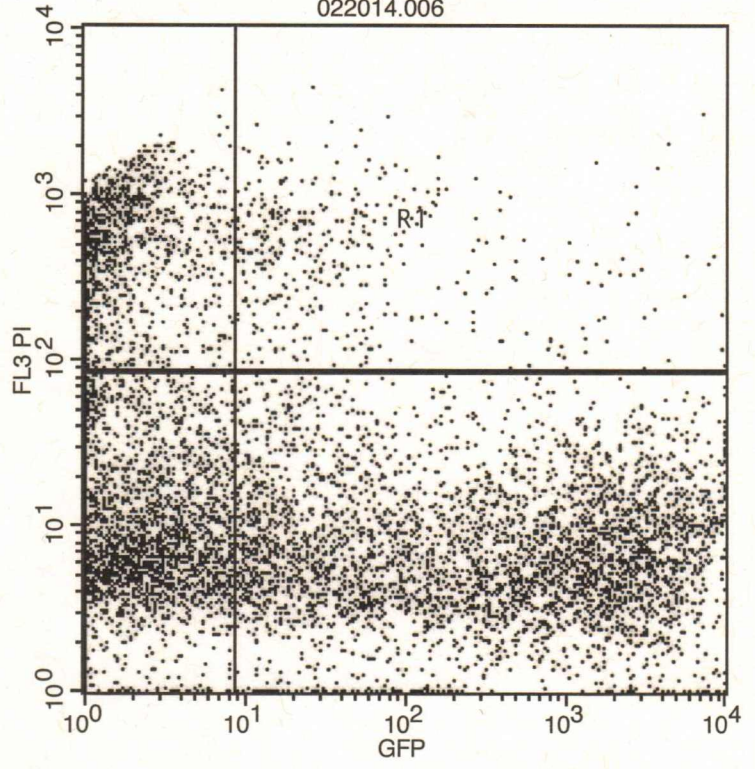

Quadrant Statistics

File: 022014.006  
 Sample ID:  
 Tube: Untitled  
 Acquisition Date: 20-Feb-14  
 Gated Events: 10000  
 X Parameter: GFP (Log)  
 Quad Location: 9, 83

Log Data Units: Linear Values  
 Patient ID:  
 Panel: Untitled Acquisition Tube List  
 Gate: No Gate  
 Total Events: 10000  
 Y Parameter: FL3 PI (Log)

| Quad | Events | % Gated | % Total | X Mean  | X Geo Mean | Y Mean | Y Geo Mean |
|------|--------|---------|---------|---------|------------|--------|------------|
| UL   | 1302   | 13.02   | 13.02   | 2.06    | 1.69       | 520.36 | 374.88     |
| UR   | 406    | 4.06    | 4.06    | 396.34  | 53.01      | 563.95 | 405.26     |
| LL   | 4308   | 43.08   | 43.08   | 2.15    | 1.66       | 14.12  | 7.90       |
| LR   | 3984   | 39.84   | 39.84   | 1383.06 | 301.20     | 10.41  | 6.77       |

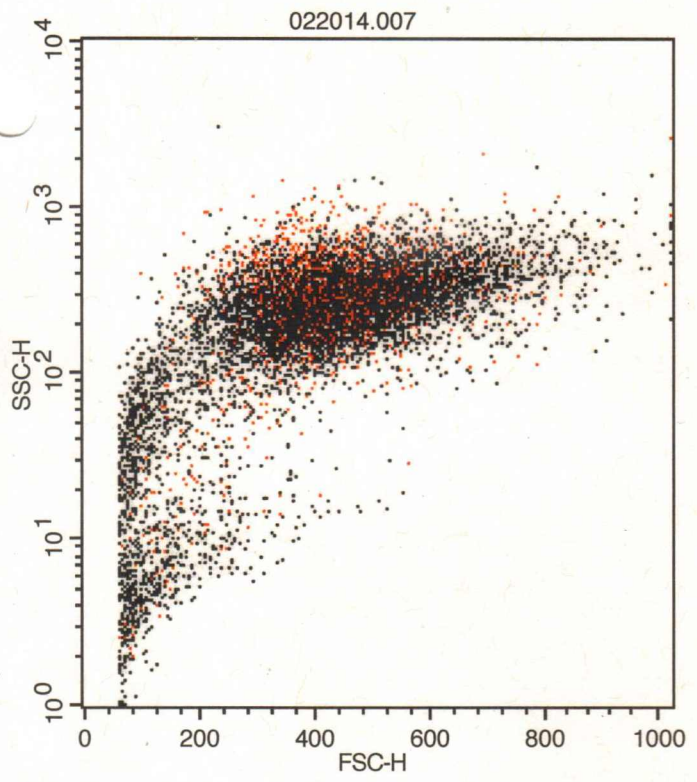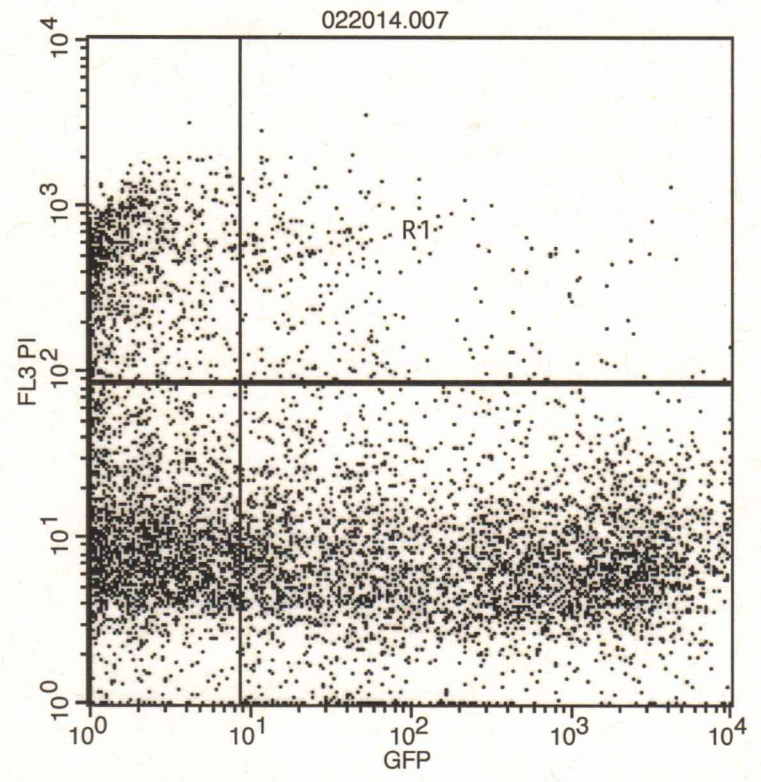

Quadrant Statistics

File: 022014.007  
 Sample ID:  
 Tube: Untitled  
 Acquisition Date: 20-Feb-14  
 Gated Events: 10000  
 X Parameter: GFP (Log)  
 Quad Location: 9, 83

Log Data Units: Linear Values  
 Patient ID:  
 Panel: Untitled Acquisition Tube List  
 Gate: No Gate  
 Total Events: 10000  
 Y Parameter: FL3 PI (Log)

| Quad | Events | % Gated | % Total | X Mean  | X Geo Mean | Y Mean | Y Geo Mean |
|------|--------|---------|---------|---------|------------|--------|------------|
| UL   | 1234   | 12.34   | 12.34   | 2.04    | 1.67       | 483.89 | 369.39     |
| UR   | 315    | 3.15    | 3.15    | 327.98  | 52.68      | 490.72 | 339.96     |
| LL   | 4442   | 44.42   | 44.42   | 2.09    | 1.62       | 13.87  | 8.17       |
| LR   | 4009   | 40.09   | 40.09   | 1206.70 | 275.03     | 10.04  | 6.89       |

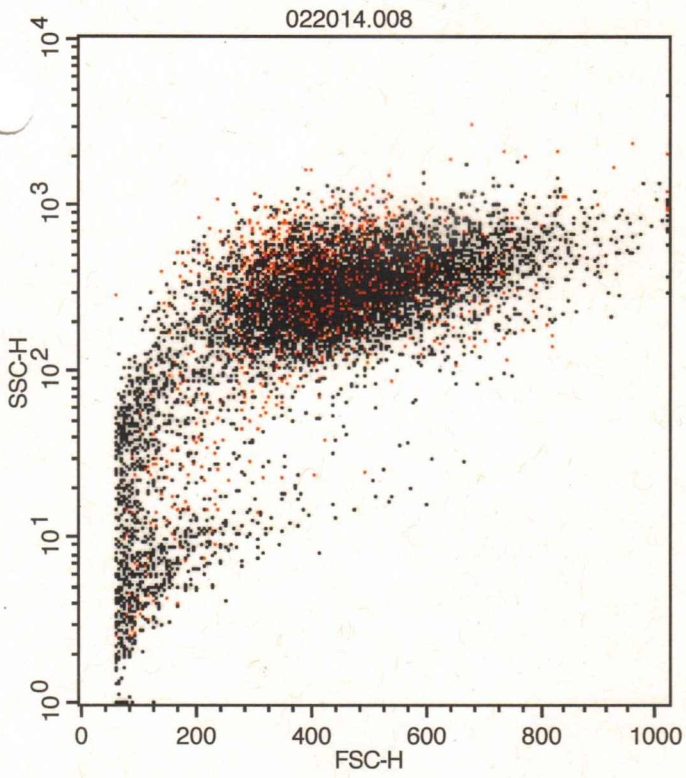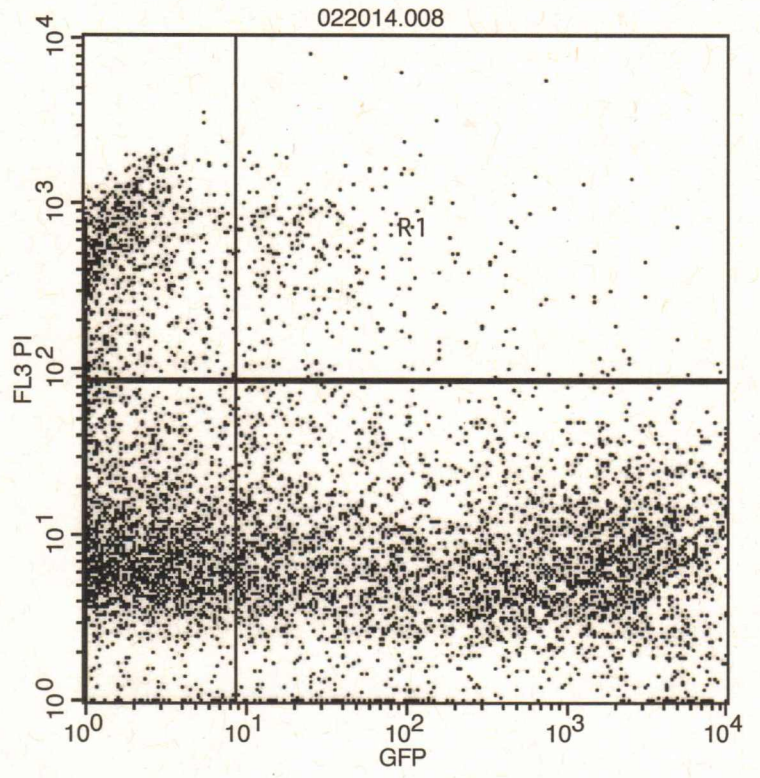

Quadrant Statistics

File: 022014.008  
 Sample ID:  
 Tube: Untitled  
 Acquisition Date: 20-Feb-14  
 Gated Events: 10000  
 X Parameter: GFP (Log)  
 Quad Location: 9, 83

Log Data Units: Linear Values  
 Patient ID:  
 Panel: Untitled Acquisition Tube List  
 Gate: No Gate  
 Total Events: 10000  
 Y Parameter: FL3 PI (Log)

| Quad | Events | % Gated | % Total | X Mean  | X Geo Mean | Y Mean | Y Geo Mean |
|------|--------|---------|---------|---------|------------|--------|------------|
| UL   | 1151   | 11.51   | 11.51   | 2.01    | 1.67       | 514.88 | 369.41     |
| UR   | 325    | 3.25    | 3.25    | 293.63  | 52.80      | 615.75 | 408.09     |
| LL   | 4334   | 43.34   | 43.34   | 2.14    | 1.66       | 13.09  | 7.75       |
| LR   | 4190   | 41.90   | 41.90   | 1395.80 | 301.88     | 10.31  | 6.78       |



S18) PEST / GFP

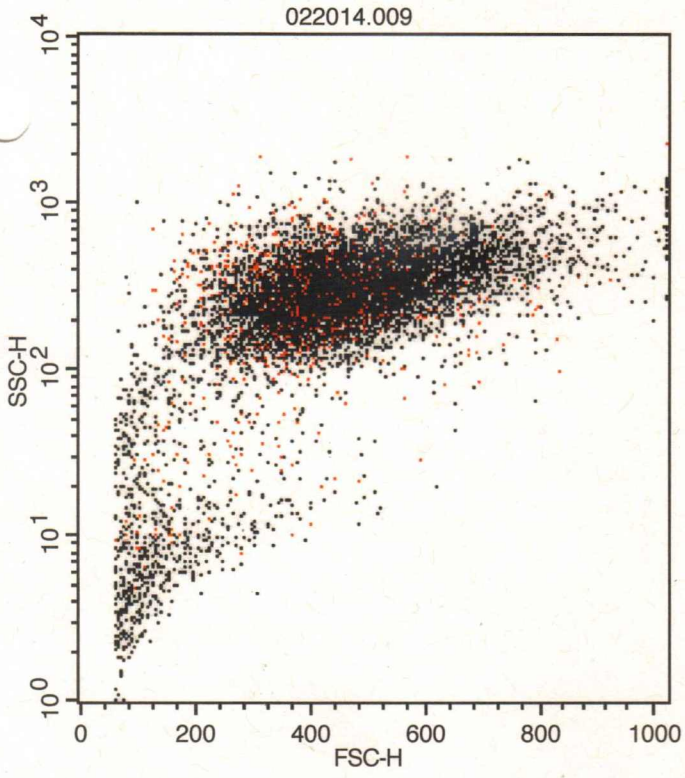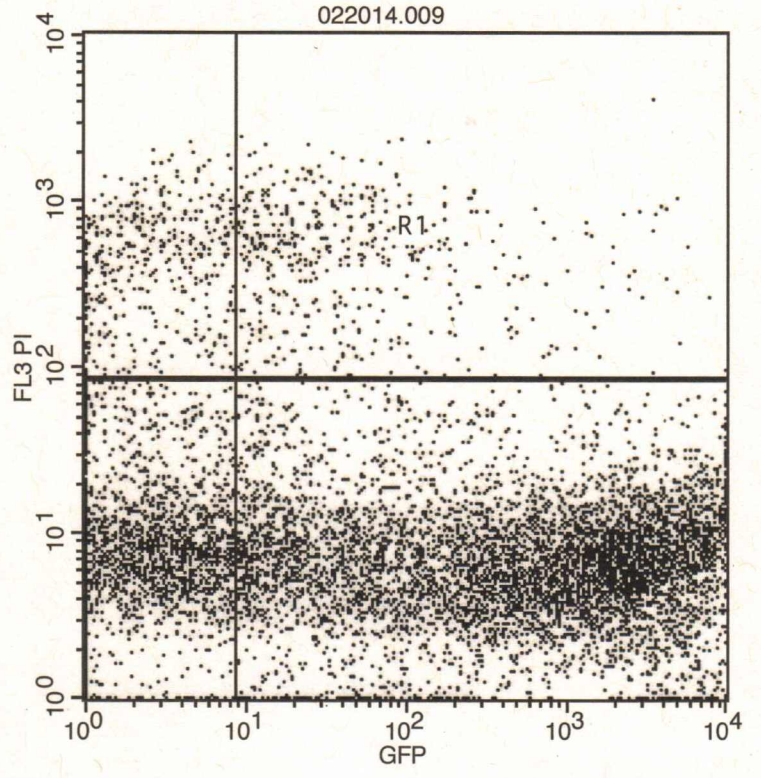

Quadrant Statistics

File: 022014.009  
 Sample ID:  
 Tube: Untitled  
 Acquisition Date: 20-Feb-14  
 Gated Events: 10000  
 X Parameter: GFP (Log)  
 Quad Location: 9, 83

Log Data Units: Linear Values  
 Patient ID:  
 Panel: Untitled Acquisition Tube List  
 Gate: No Gate  
 Total Events: 10000  
 Y Parameter: FL3 PI (Log)

| Quad | Events | % Gated | % Total | X Mean  | X Geo Mean | Y Mean | Y Geo Mean |
|------|--------|---------|---------|---------|------------|--------|------------|
| UL   | 467    | 4.67    | 4.67    | 3.14    | 2.44       | 510.10 | 387.03     |
| UR   | 482    | 4.82    | 4.82    | 288.17  | 50.26      | 582.38 | 432.20     |
| LL   | 2562   | 25.62   | 25.62   | 2.74    | 2.10       | 11.52  | 7.41       |
| LR   | 6489   | 64.89   | 64.89   | 1836.35 | 482.67     | 8.84   | 6.31       |

Syn 87 PEST / GFP

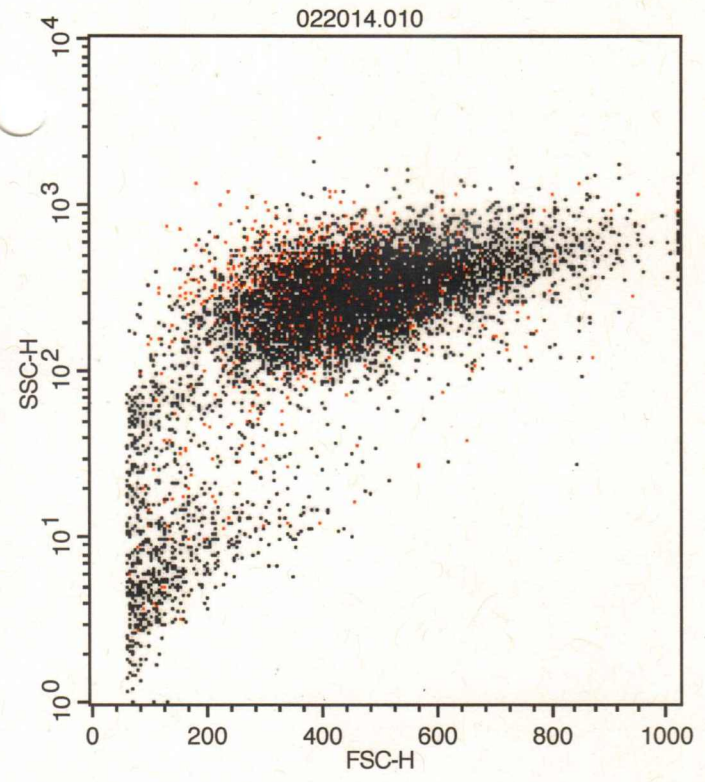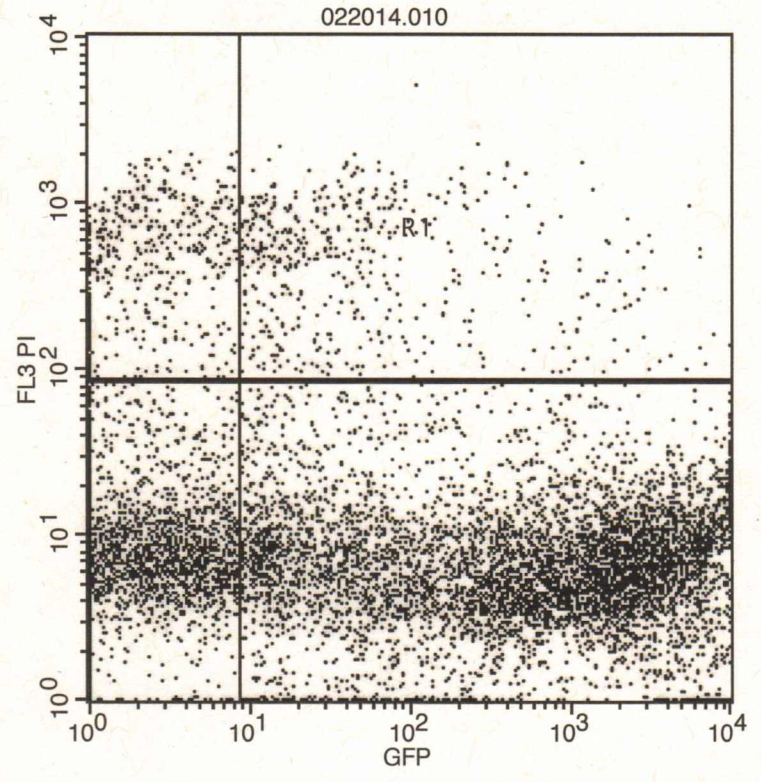

Quadrant Statistics

File: 022014.010  
Sample ID:  
Tube: Untitled  
Acquisition Date: 20-Feb-14  
Gated Events: 10000  
X Parameter: GFP (Log)  
Quad Location: 9, 83  
Log Data Units: Linear Values  
Patient ID:  
Panel: Untitled Acquisition Tube List  
Gate: No Gate  
Total Events: 10000  
Y Parameter: FL3 PI (Log)

| Quad | Events | % Gated | % Total | X Mean  | X Geo Mean | Y Mean | Y Geo Mean |
|------|--------|---------|---------|---------|------------|--------|------------|
| UL   | 476    | 4.76    | 4.76    | 3.05    | 2.40       | 572.39 | 424.00     |
| UR   | 515    | 5.15    | 5.15    | 345.20  | 55.32      | 564.48 | 413.62     |
| LL   | 2655   | 26.55   | 26.55   | 2.67    | 2.04       | 11.23  | 7.34       |
| LR   | 6354   | 63.54   | 63.54   | 1842.96 | 488.99     | 9.01   | 6.29       |

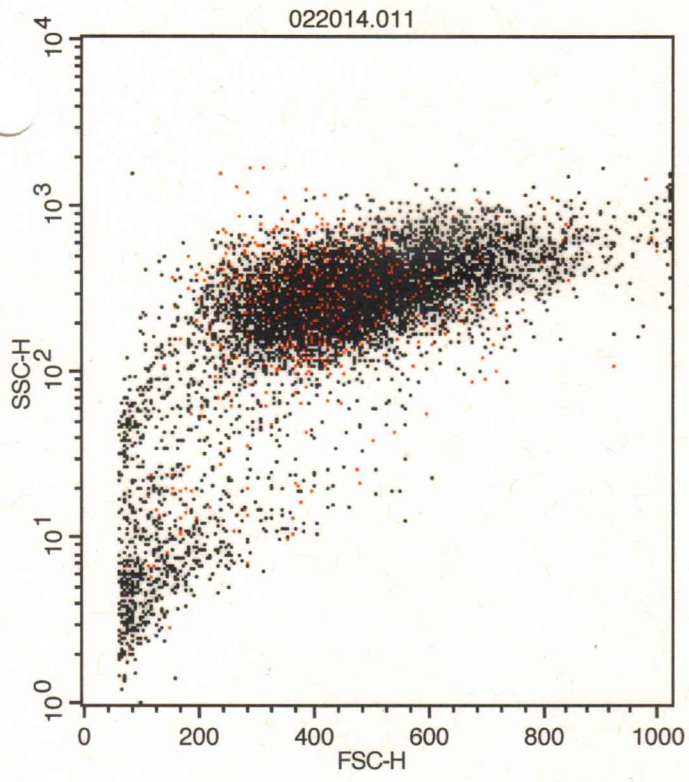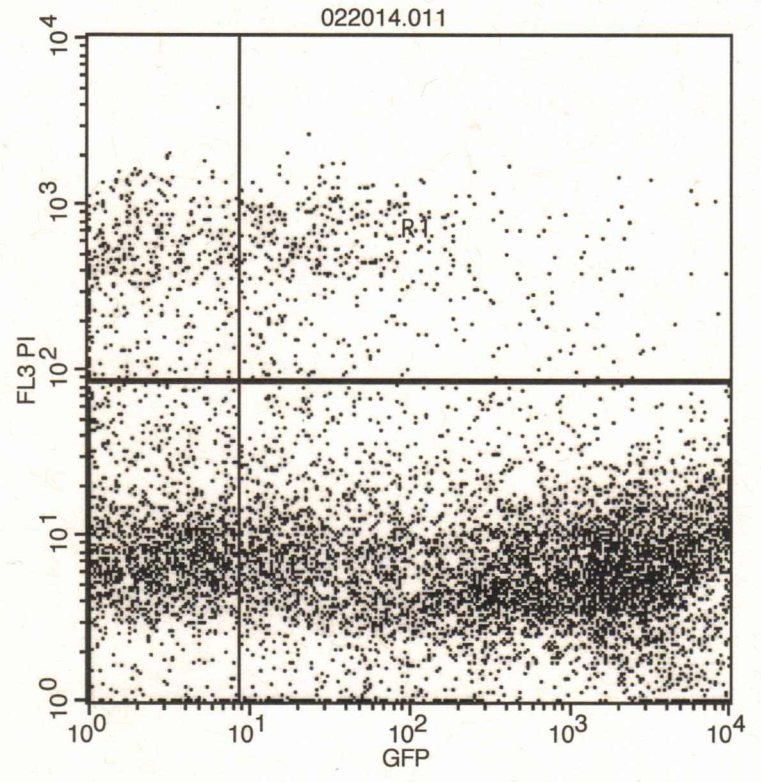

Quadrant Statistics

File: 022014.011                      Log Data Units: Linear Values  
 Sample ID:                              Patient ID:  
 Tube: Untitled                          Panel: Untitled Acquisition Tube List  
 Acquisition Date: 20-Feb-14          Gate: No Gate  
 Gated Events: 10000                    Total Events: 10000  
 X Parameter: GFP (Log)                Y Parameter: FL3 PI (Log)  
 Quad Location: 9, 83

| Quad | Events | % Gated | % Total | X Mean  | X Geo Mean | Y Mean | Y Geo Mean |
|------|--------|---------|---------|---------|------------|--------|------------|
| UL   | 481    | 4.81    | 4.81    | 2.94    | 2.32       | 531.45 | 408.70     |
| UR   | 463    | 4.63    | 4.63    | 348.44  | 60.31      | 555.54 | 427.32     |
| LL   | 2619   | 26.19   | 26.19   | 2.70    | 2.05       | 10.99  | 6.99       |
| LR   | 6437   | 64.37   | 64.37   | 1828.74 | 494.20     | 8.66   | 6.05       |

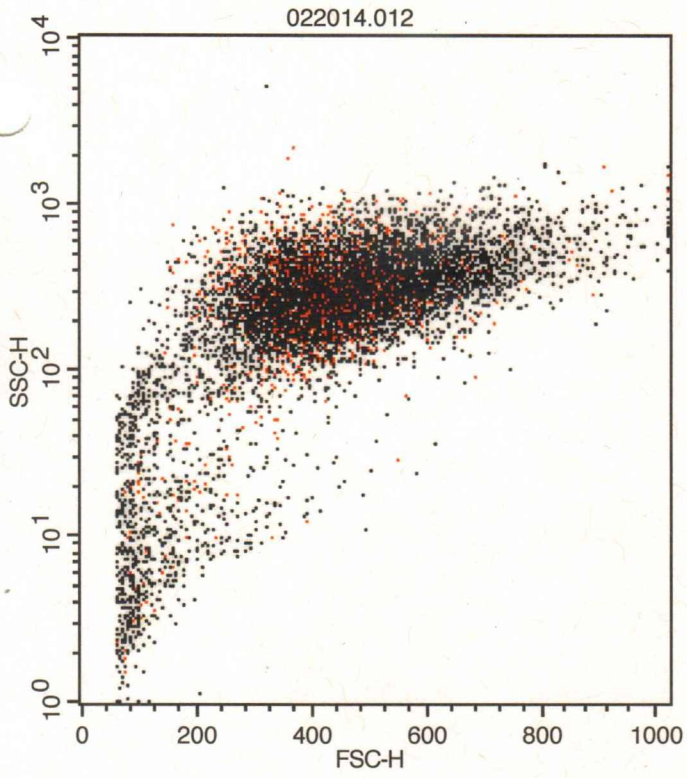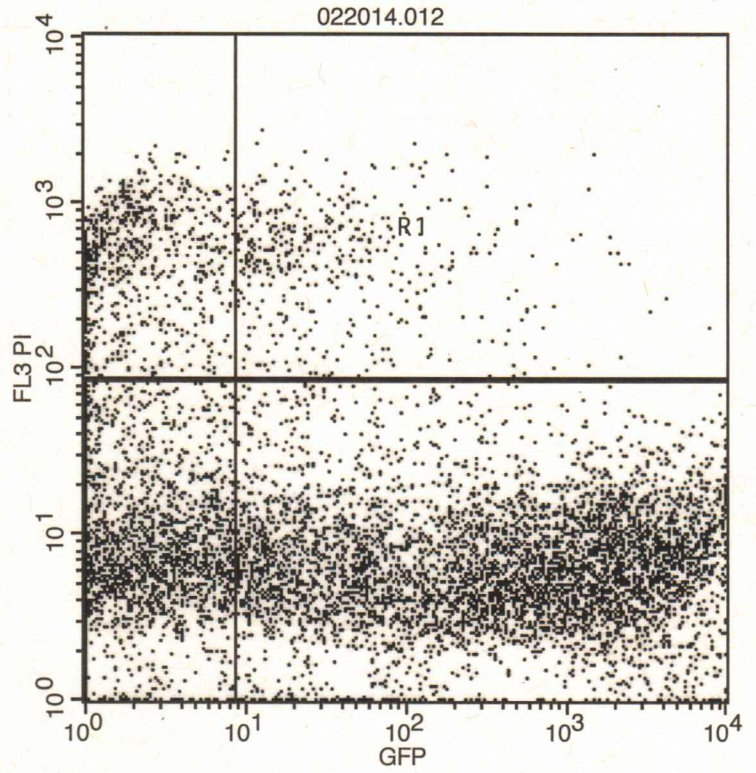

Quadrant Statistics

File: 022014.012  
 Sample ID:  
 Tube: Untitled  
 Acquisition Date: 20-Feb-14  
 Gated Events: 10000  
 X Parameter: GFP (Log)  
 Quad Location: 9, 83

Log Data Units: Linear Values  
 Patient ID:  
 Panel: Untitled Acquisition Tube List  
 Gate: No Gate  
 Total Events: 10000  
 Y Parameter: FL3 PI (Log)

| Quad | Events | % Gated | % Total | X Mean  | X Geo Mean | Y Mean | Y Geo Mean |
|------|--------|---------|---------|---------|------------|--------|------------|
| UL   | 868    | 8.68    | 8.68    | 2.50    | 1.98       | 518.93 | 395.96     |
| UR   | 456    | 4.56    | 4.56    | 155.31  | 39.40      | 546.10 | 415.26     |
| LL   | 3129   | 31.29   | 31.29   | 2.49    | 1.88       | 13.33  | 7.56       |
| LR   | 5547   | 55.47   | 55.47   | 1516.21 | 374.39     | 8.85   | 6.17       |

022014.013

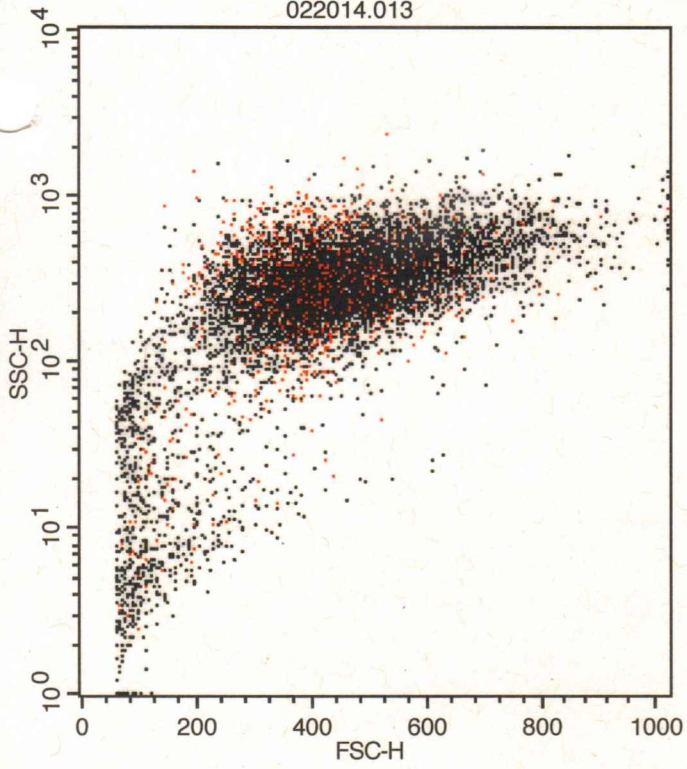

022014.013

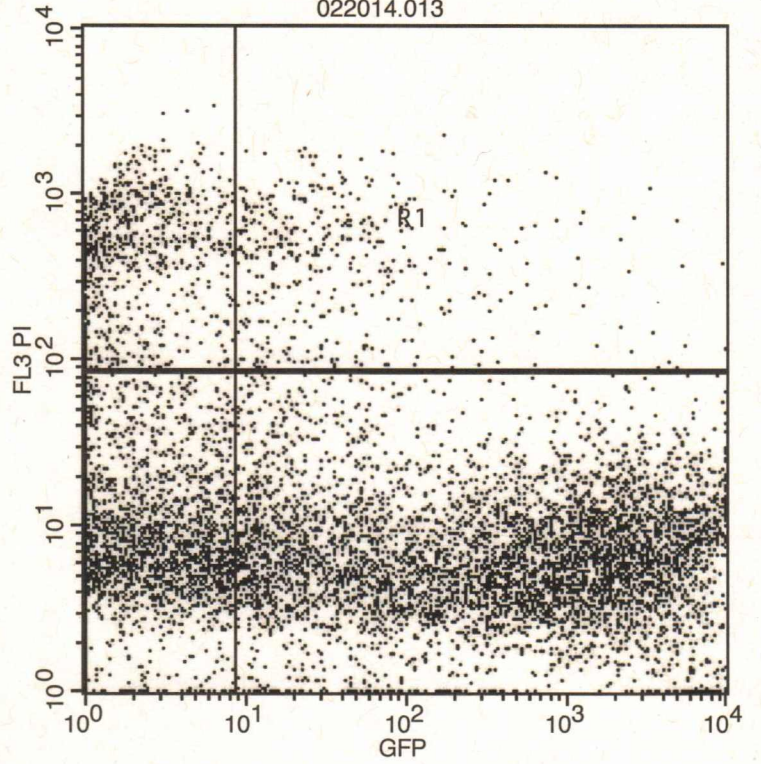

Quadrant Statistics

File: 022014.013  
 Sample ID:  
 Tube: Untitled  
 Acquisition Date: 20-Feb-14  
 Gated Events: 10000  
 X Parameter: GFP (Log)  
 Quad Location: 9, 83

Log Data Units: Linear Values  
 Patient ID:  
 Panel: Untitled Acquisition Tube List  
 Gate: No Gate  
 Total Events: 10000  
 Y Parameter: FL3 PI (Log)

| Quad | Events | % Gated | % Total | X Mean  | X Geo Mean | Y Mean | Y Geo Mean |
|------|--------|---------|---------|---------|------------|--------|------------|
| UL   | 930    | 9.30    | 9.30    | 2.34    | 1.86       | 525.66 | 391.77     |
| UR   | 423    | 4.23    | 4.23    | 254.66  | 45.24      | 515.21 | 381.00     |
| LL   | 3138   | 31.38   | 31.38   | 2.61    | 1.96       | 12.87  | 7.58       |
| LR   | 5509   | 55.09   | 55.09   | 1514.60 | 368.53     | 8.92   | 6.21       |

VH1 REST / GFP

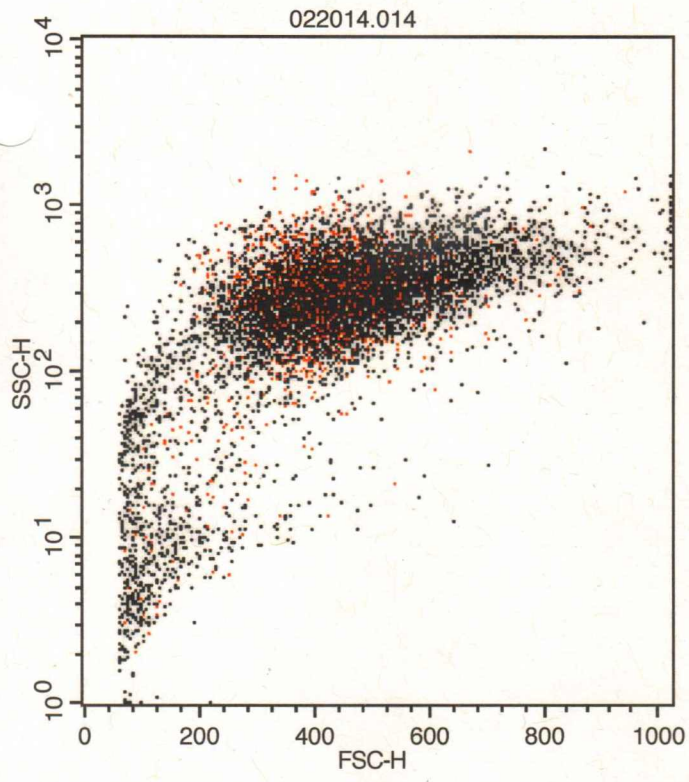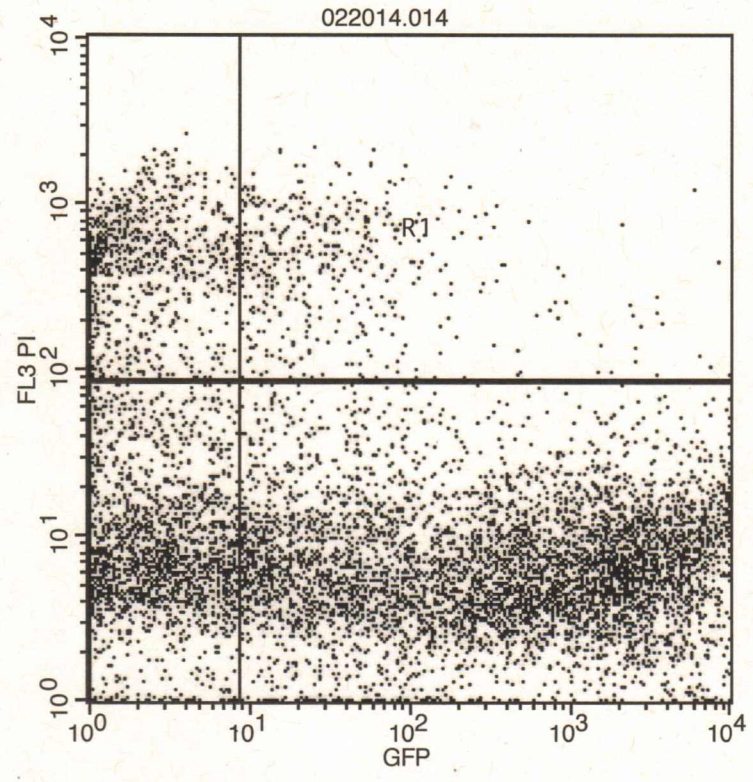

Quadrant Statistics

File: 022014.014  
 Sample ID:  
 Tube: Untitled  
 Acquisition Date: 20-Feb-14  
 Gated Events: 10000  
 X Parameter: GFP (Log)  
 Quad Location: 9, 83

Log Data Units: Linear Values  
 Patient ID:  
 Panel: Untitled Acquisition Tube List  
 Gate: No Gate  
 Total Events: 10000  
 Y Parameter: FL3 PI (Log)

| Quad | Events | % Gated | % Total | X Mean  | X Geo Mean | Y Mean | Y Geo Mean |
|------|--------|---------|---------|---------|------------|--------|------------|
| UL   | 984    | 9.84    | 9.84    | 2.44    | 1.92       | 492.21 | 370.25     |
| UR   | 450    | 4.50    | 4.50    | 224.99  | 37.94      | 526.21 | 397.53     |
| LL   | 3073   | 30.73   | 30.73   | 2.49    | 1.89       | 12.82  | 7.37       |
| LR   | 5493   | 54.93   | 54.93   | 1534.25 | 368.50     | 8.89   | 6.11       |

Empty Vector / Syn ~ GFP

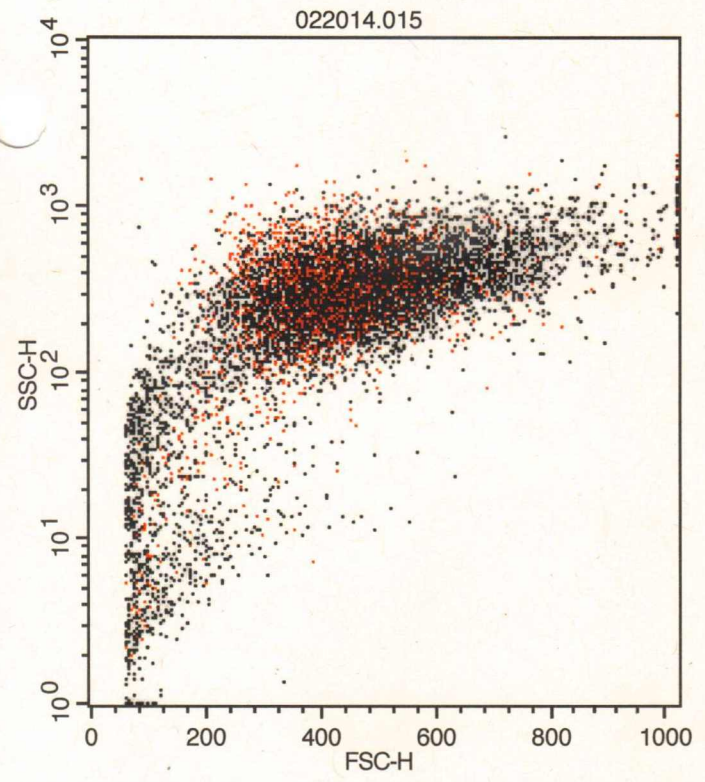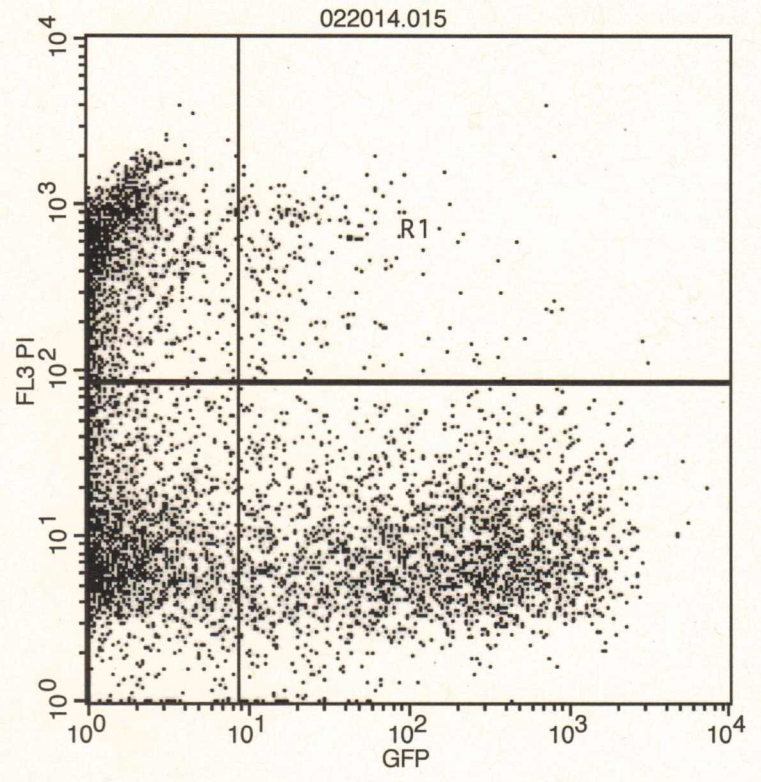

Quadrant Statistics

File: 022014.015  
Sample ID:  
Tube: Untitled  
Acquisition Date: 20-Feb-14  
Gated Events: 10000  
X Parameter: GFP (Log)  
Quad Location: 9, 83  
Log Data Units: Linear Values  
Patient ID:  
Panel: Untitled Acquisition Tube List  
Gate: No Gate  
Total Events: 10000  
Y Parameter: FL3 PI (Log)

| Quad | Events | % Gated | % Total | X Mean | X Geo Mean | Y Mean | Y Geo Mean |
|------|--------|---------|---------|--------|------------|--------|------------|
| UL   | 1993   | 19.93   | 19.93   | 1.67   | 1.44       | 534.70 | 395.97     |
| UR   | 235    | 2.35    | 2.35    | 97.10  | 32.32      | 568.91 | 417.25     |
| LL   | 5326   | 53.26   | 53.26   | 1.54   | 1.30       | 14.37  | 8.38       |
| LR   | 2446   | 24.46   | 24.46   | 362.99 | 143.83     | 11.46  | 8.03       |

Empty Vector / S<sub>1</sub> ~ GFP

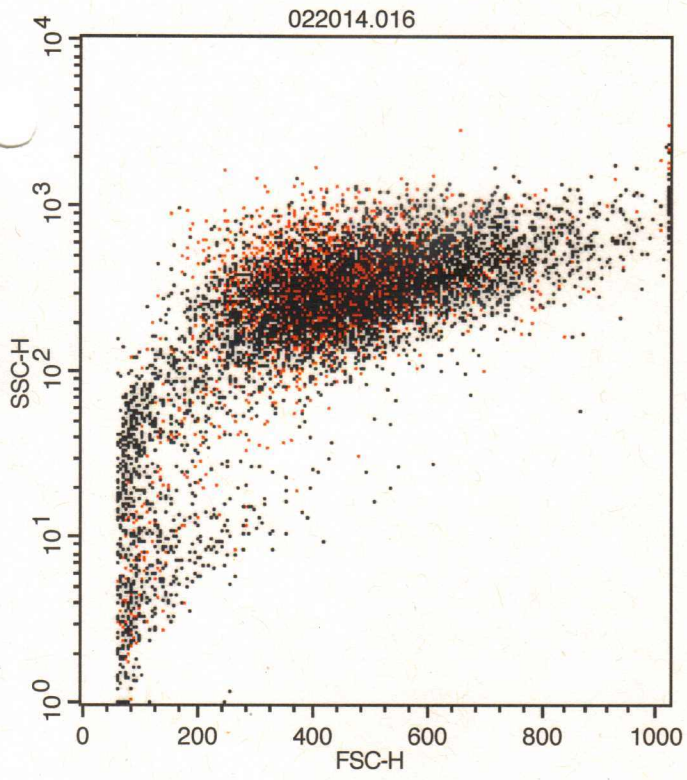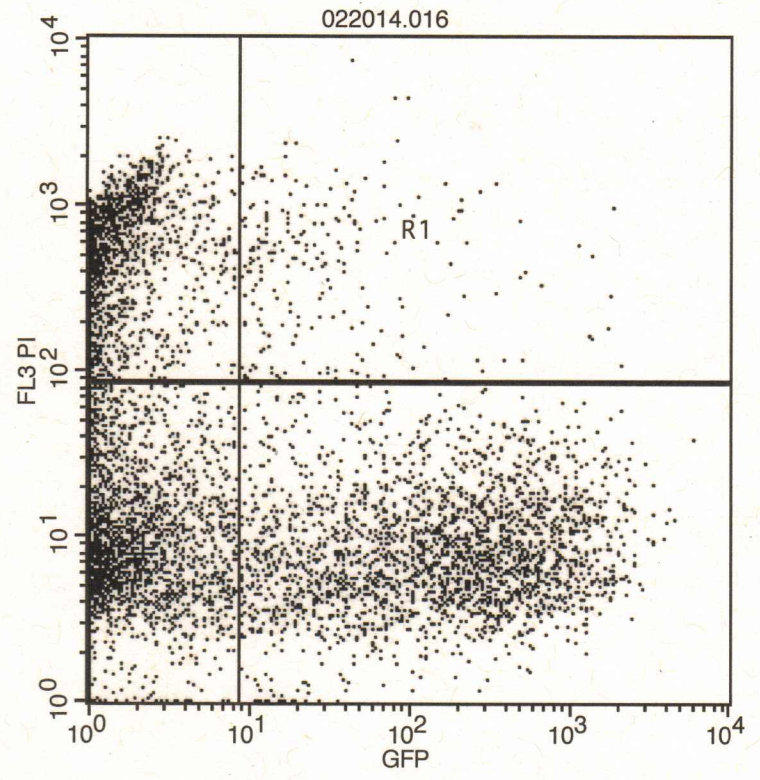

Quadrant Statistics

File: 022014.016                      Log Data Units: Linear Values  
Sample ID:                                Patient ID:  
Tube: Untitled                            Panel: Untitled Acquisition Tube List  
Acquisition Date: 20-Feb-14            Gate: No Gate  
Gated Events: 10000                    Total Events: 10000  
X Parameter: GFP (Log)                 Y Parameter: FL3 PI (Log)  
Quad Location: 9, 83

| Quad | Events | % Gated | % Total | X Mean | X Geo Mean | Y Mean | Y Geo Mean |
|------|--------|---------|---------|--------|------------|--------|------------|
| UL   | 1930   | 19.30   | 19.30   | 1.65   | 1.43       | 542.21 | 399.18     |
| UR   | 224    | 2.24    | 2.24    | 113.72 | 33.51      | 629.93 | 410.67     |
| LL   | 5439   | 54.39   | 54.39   | 1.57   | 1.32       | 14.36  | 8.70       |
| LR   | 2407   | 24.07   | 24.07   | 366.15 | 150.67     | 11.26  | 8.00       |



Empty Vector / Syn-GFP

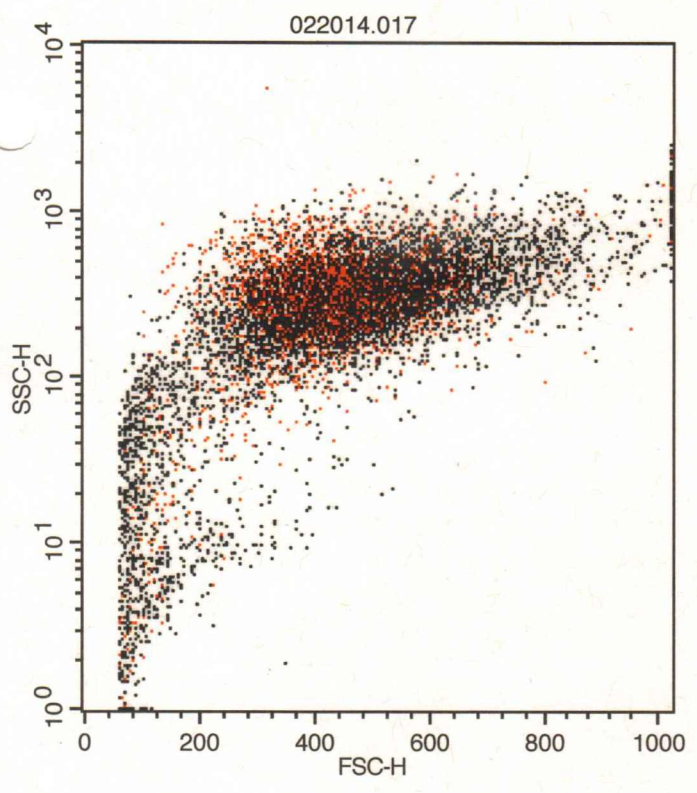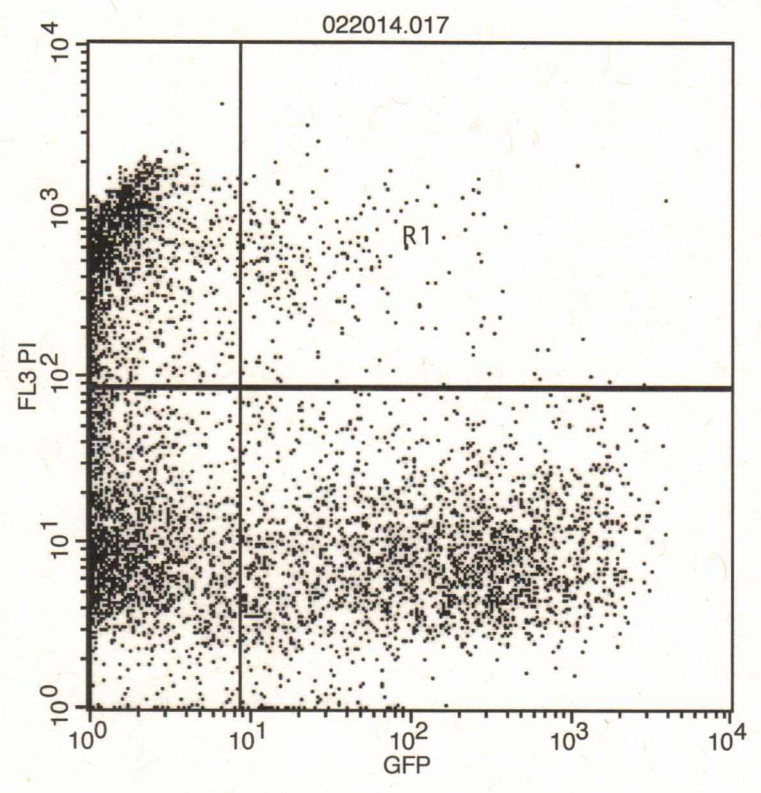

Quadrant Statistics

File: 022014.017  
 Sample ID:  
 Tube: Untitled  
 Acquisition Date: 20-Feb-14  
 Gated Events: 10000  
 X Parameter: GFP (Log)  
 Quad Location: 9, 83

Log Data Units: Linear Values  
 Patient ID:  
 Panel: Untitled Acquisition Tube List  
 Gate: No Gate  
 Total Events: 10000  
 Y Parameter: FL3 PI (Log)

| Quad | Events | % Gated | % Total | X Mean | X Geo Mean | Y Mean | Y Geo Mean |
|------|--------|---------|---------|--------|------------|--------|------------|
| UL   | 2138   | 21.38   | 21.38   | 1.71   | 1.47       | 565.20 | 416.85     |
| UR   | 256    | 2.56    | 2.56    | 110.65 | 33.66      | 577.59 | 436.21     |
| LL   | 5248   | 52.48   | 52.48   | 1.54   | 1.30       | 14.56  | 8.67       |
| LR   | 2358   | 23.58   | 23.58   | 358.70 | 136.78     | 11.75  | 8.08       |

Sy<sup>+</sup> 87 PESt / Sy<sup>+</sup> ~ GFP

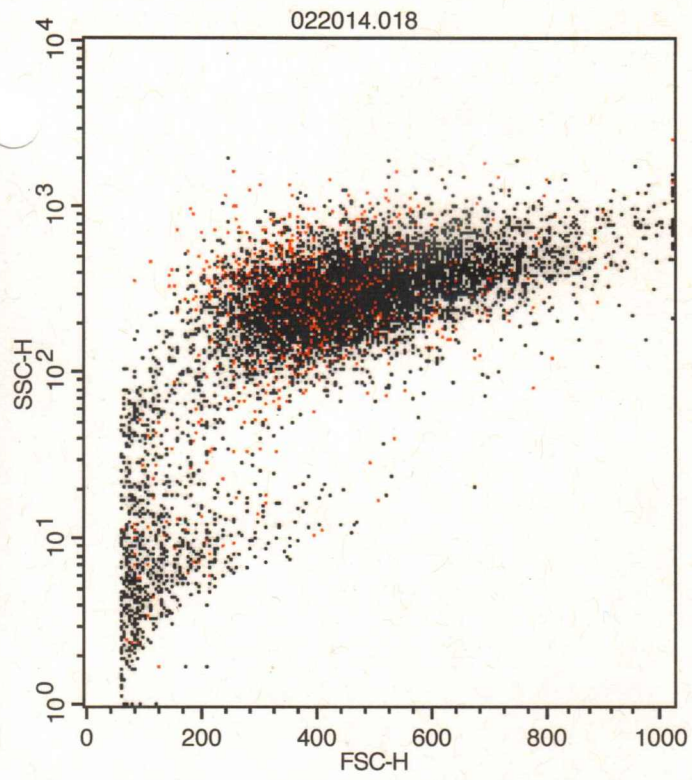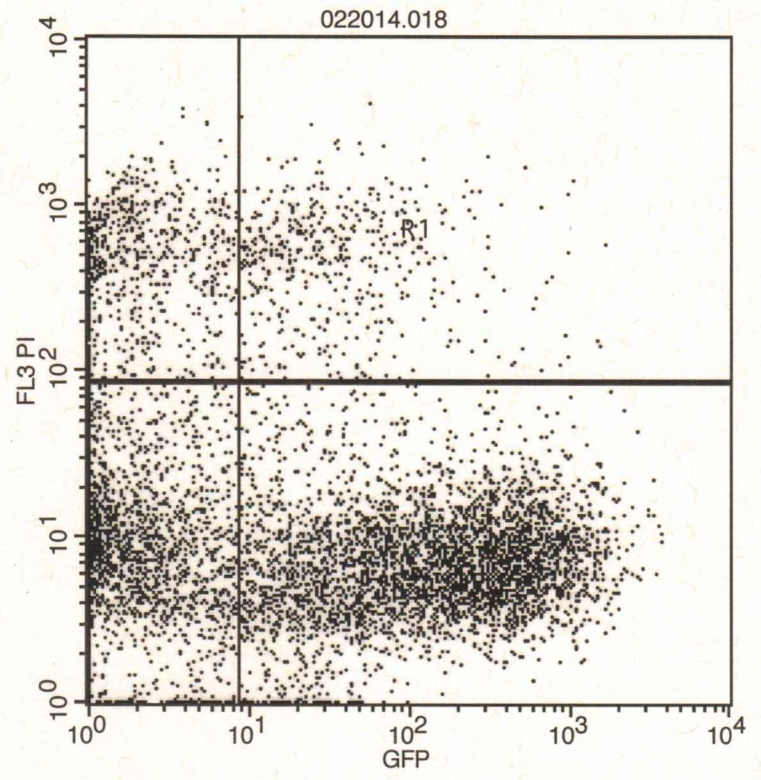

Quadrant Statistics

File: 022014.018  
Sample ID:  
Tube: Untitled  
Acquisition Date: 20-Feb-14  
Gated Events: 10000  
X Parameter: GFP (Log)  
Quad Location: 9, 83  
Log Data Units: Linear Values  
Patient ID:  
Panel: Untitled Acquisition Tube List  
Gate: No Gate  
Total Events: 10000  
Y Parameter: FL3 PI (Log)

| Quad | Events | % Gated | % Total | X Mean | X Geo Mean | Y Mean | Y Geo Mean |
|------|--------|---------|---------|--------|------------|--------|------------|
| UL   | 844    | 8.44    | 8.44    | 2.35   | 1.84       | 511.63 | 376.88     |
| UR   | 464    | 4.64    | 4.64    | 85.70  | 36.87      | 579.49 | 429.23     |
| LL   | 4573   | 45.73   | 45.73   | 1.70   | 1.37       | 11.35  | 7.45       |
| LR   | 4119   | 41.19   | 41.19   | 294.64 | 128.76     | 9.06   | 6.70       |

S37 87PEST / S37 ~ GFP

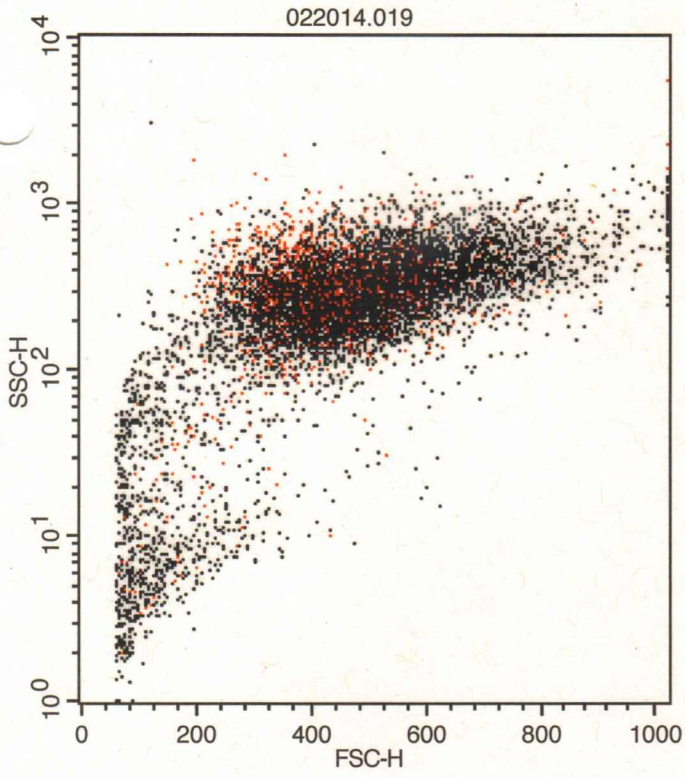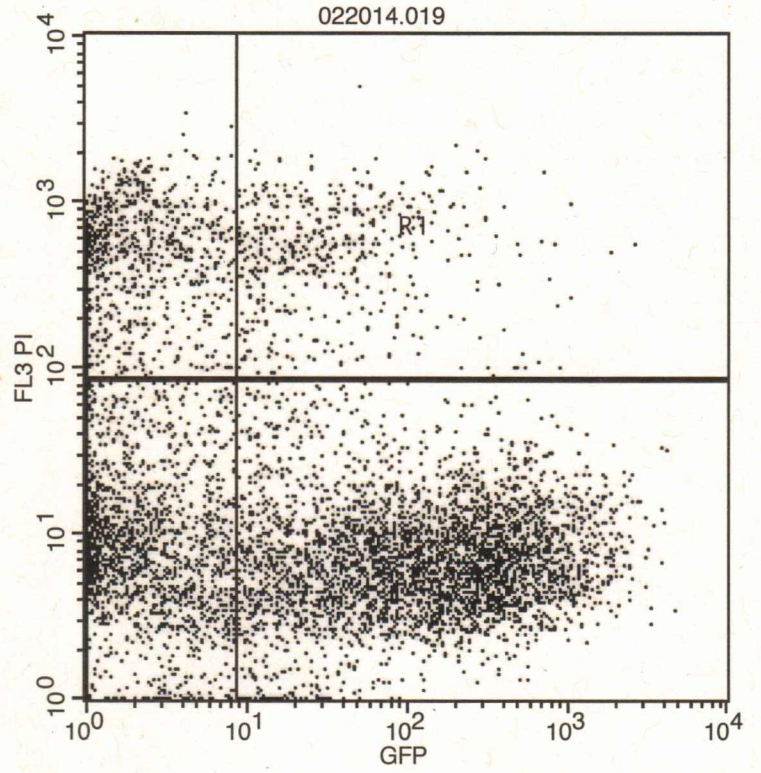

Quadrant Statistics

File: 022014.019  
 Sample ID:  
 Tube: Untitled  
 Acquisition Date: 20-Feb-14  
 Gated Events: 10000  
 X Parameter: GFP (Log)  
 Quad Location: 9, 83

Log Data Units: Linear Values  
 Patient ID:  
 Panel: Untitled Acquisition Tube List  
 Gate: No Gate  
 Total Events: 10000  
 Y Parameter: FL3 PI (Log)

| Quad | Events | % Gated | % Total | X Mean | X Geo Mean | Y Mean | Y Geo Mean |
|------|--------|---------|---------|--------|------------|--------|------------|
| UL   | 962    | 9.62    | 9.62    | 2.27   | 1.82       | 531.22 | 401.62     |
| UR   | 480    | 4.80    | 4.80    | 83.13  | 34.97      | 590.80 | 458.26     |
| LL   | 4610   | 46.10   | 46.10   | 1.73   | 1.37       | 11.51  | 7.42       |
| LR   | 3948   | 39.48   | 39.48   | 296.40 | 126.58     | 9.18   | 6.70       |

S77 87 REST / Sm ~ GFP

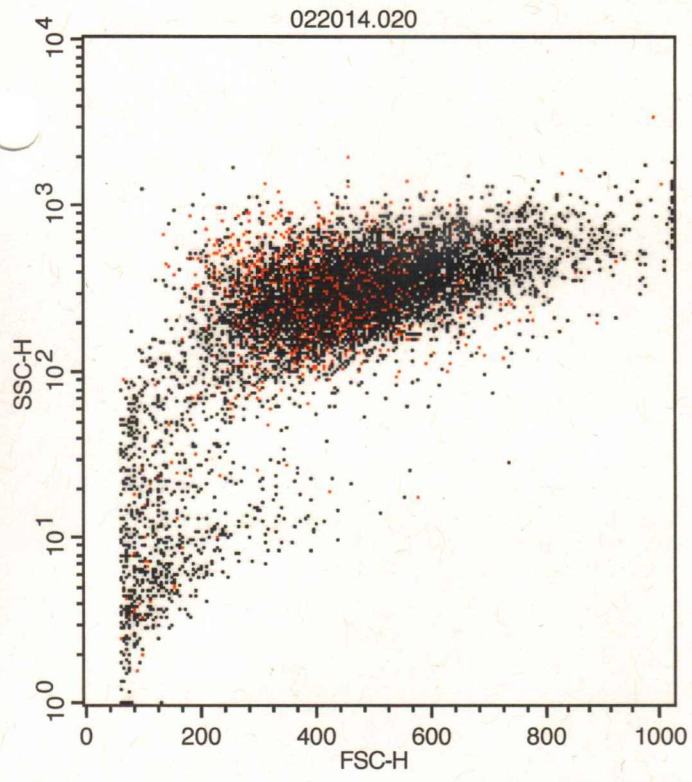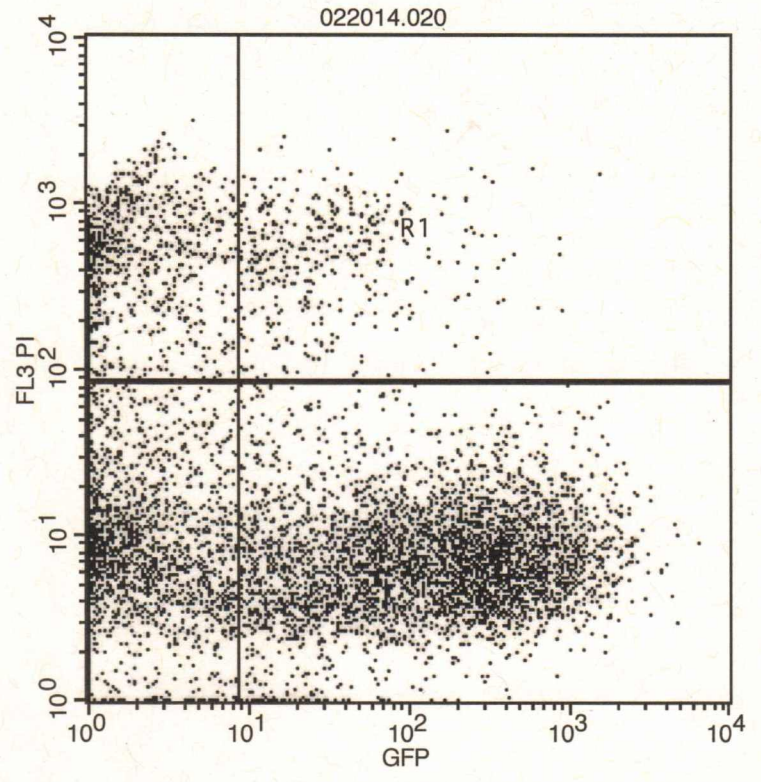

Quadrant Statistics

File: 022014.020  
Sample ID:  
Tube: Untitled  
Acquisition Date: 20-Feb-14  
Gated Events: 10000  
X Parameter: GFP (Log)  
Quad Location: 9, 83

Log Data Units: Linear Values  
Patient ID:  
Panel: Untitled Acquisition Tube List  
Gate: No Gate  
Total Events: 10000  
Y Parameter: FL3 PI (Log)

| Quad | Events | % Gated | % Total | X Mean | X Geo Mean | Y Mean | Y Geo Mean |
|------|--------|---------|---------|--------|------------|--------|------------|
| UL   | 933    | 9.33    | 9.33    | 2.30   | 1.83       | 538.49 | 397.14     |
| UR   | 418    | 4.18    | 4.18    | 63.19  | 32.20      | 583.71 | 457.84     |
| LL   | 4614   | 46.14   | 46.14   | 1.70   | 1.36       | 11.46  | 7.47       |
| LR   | 4035   | 40.35   | 40.35   | 315.09 | 132.20     | 9.25   | 6.84       |

VH14 PEST / S<sub>1226</sub> GFP

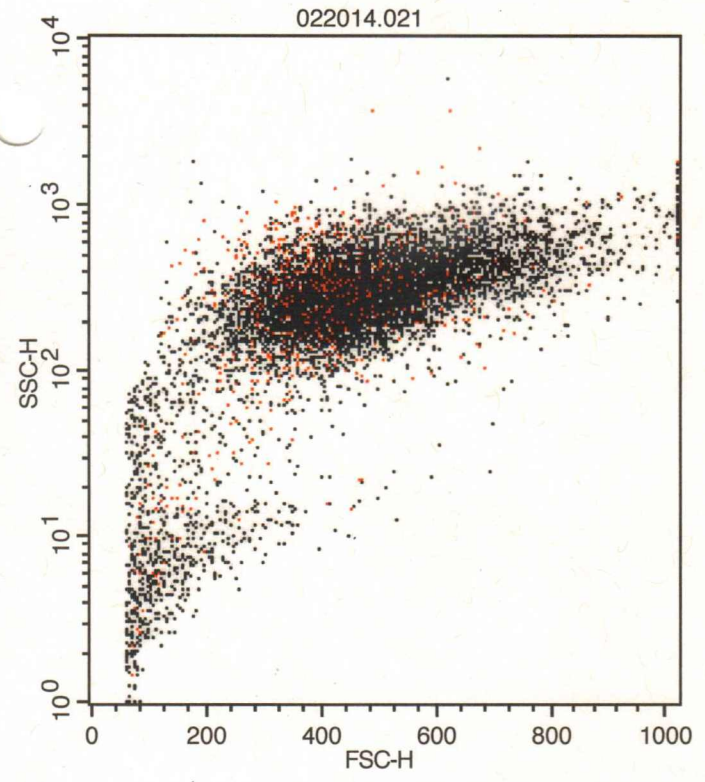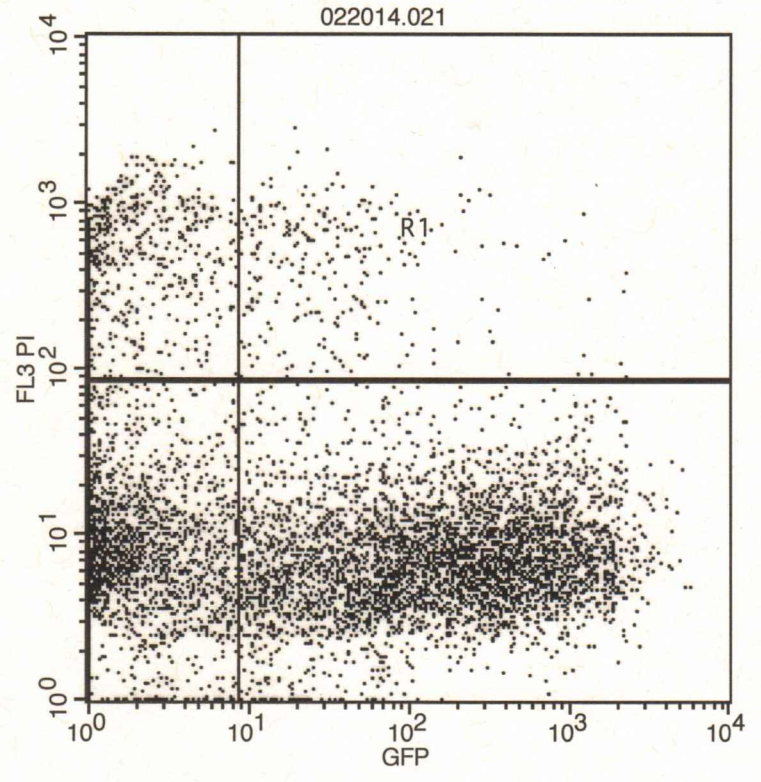

Quadrant Statistics

File: 022014.021  
Sample ID:  
Tube: Untitled  
Acquisition Date: 20-Feb-14  
Gated Events: 10000  
X Parameter: GFP (Log)  
Quad Location: 9, 83  
Log Data Units: Linear Values  
Patient ID:  
Panel: Untitled Acquisition Tube List  
Gate: No Gate  
Total Events: 10000  
Y Parameter: FL3 PI (Log)

| Quad | Events | % Gated | % Total | X Mean | X Geo Mean | Y Mean | Y Geo Mean |
|------|--------|---------|---------|--------|------------|--------|------------|
| UL   | 730    | 7.30    | 7.30    | 2.12   | 1.69       | 515.10 | 385.81     |
| UR   | 268    | 2.68    | 2.68    | 115.92 | 36.72      | 527.90 | 394.24     |
| LL   | 4785   | 47.85   | 47.85   | 1.67   | 1.36       | 10.46  | 7.11       |
| LR   | 4217   | 42.17   | 42.17   | 395.45 | 154.02     | 9.23   | 6.87       |

022014.022

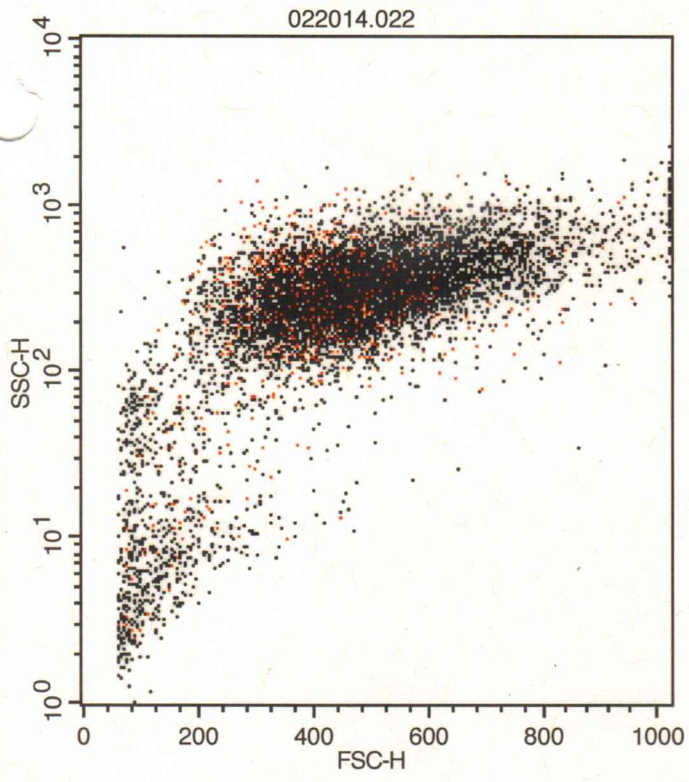

022014.022

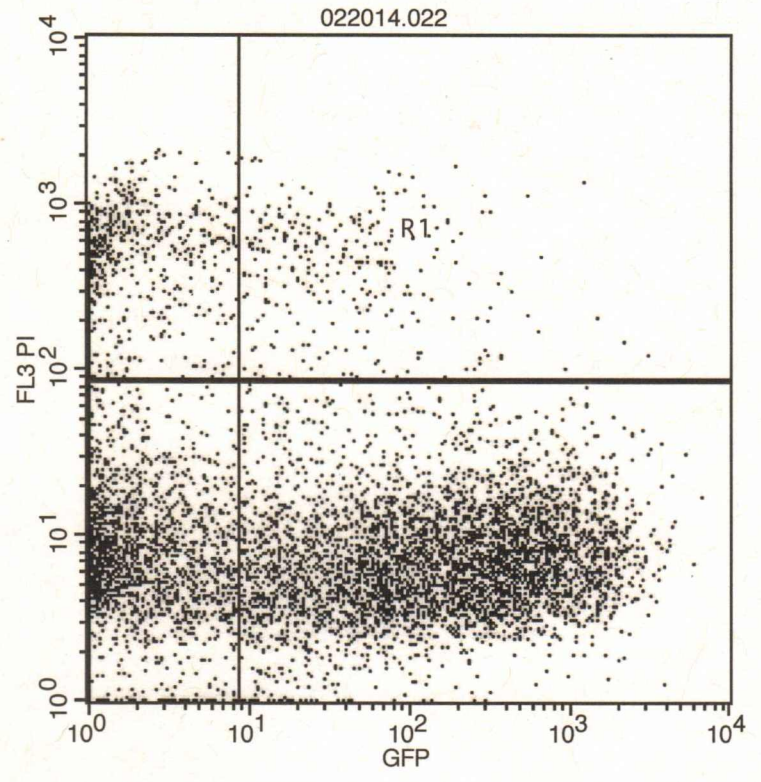

Quadrant Statistics

File: 022014.022  
 Sample ID:  
 Tube: Untitled  
 Acquisition Date: 20-Feb-14  
 Gated Events: 10000  
 X Parameter: GFP (Log)  
 Quad Location: 9, 83

Log Data Units: Linear Values  
 Patient ID:  
 Panel: Untitled Acquisition Tube List  
 Gate: No Gate  
 Total Events: 10000  
 Y Parameter: FL3 PI (Log)

| Quad | Events | % Gated | % Total | X Mean | X Geo Mean | Y Mean | Y Geo Mean |
|------|--------|---------|---------|--------|------------|--------|------------|
| UL   | 721    | 7.21    | 7.21    | 2.17   | 1.70       | 514.68 | 399.78     |
| UR   | 291    | 2.91    | 2.91    | 99.92  | 40.82      | 509.89 | 392.53     |
| LL   | 4626   | 46.26   | 46.26   | 1.69   | 1.37       | 10.37  | 7.04       |
| LR   | 4362   | 43.62   | 43.62   | 393.13 | 154.29     | 9.36   | 6.97       |

VH14 PGST / S77 ~6F8

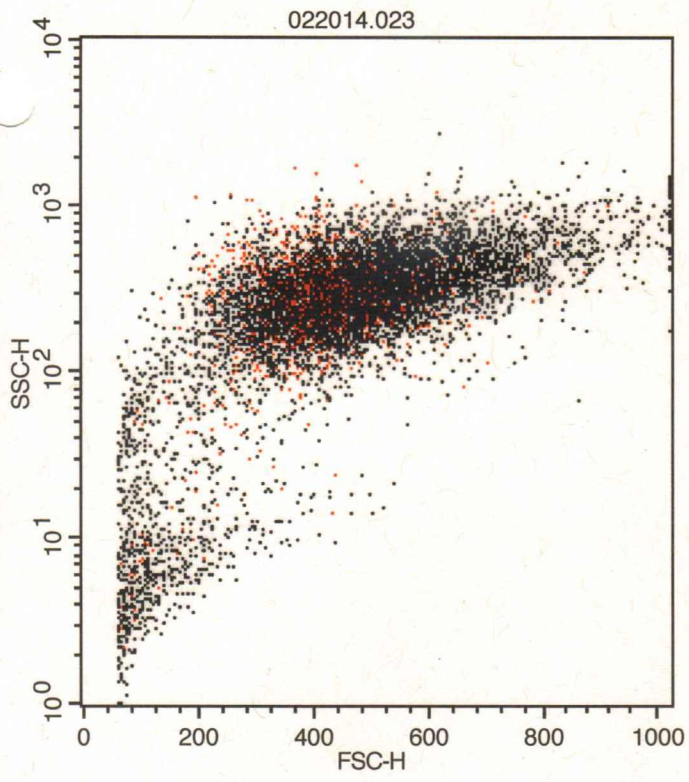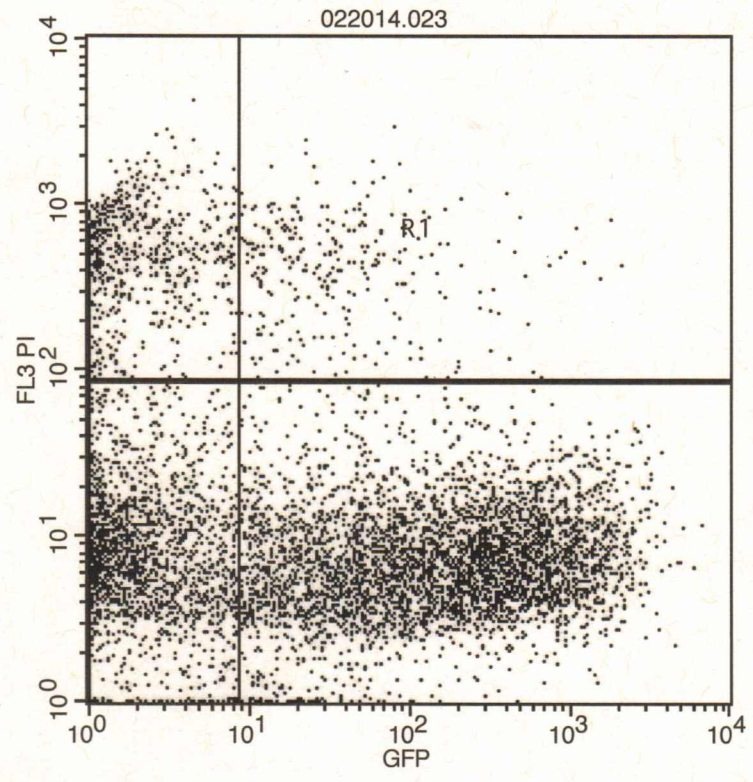

2.15  
2.11

Quadrant Statistics

File: 022014.023  
 Sample ID:  
 Tube: Untitled  
 Acquisition Date: 20-Feb-14  
 Gated Events: 10000  
 X Parameter: GFP (Log)  
 Quad Location: 9, 83

Log Data Units: Linear Values  
 Patient ID:  
 Panel: Untitled Acquisition Tube List  
 Gate: No Gate  
 Total Events: 10000  
 Y Parameter: FL3 PI (Log)

| Quad | Events | % Gated | % Total | X Mean | X Geo Mean | Y Mean | Y Geo Mean |
|------|--------|---------|---------|--------|------------|--------|------------|
| UL   | 820    | 8.20    | 8.20    | 2.23   | 1.76       | 524.78 | 401.03     |
| UR   | 287    | 2.87    | 2.87    | 99.01  | 38.14      | 505.74 | 391.77     |
| LL   | 4708   | 47.08   | 47.08   | 1.70   | 1.37       | 10.89  | 7.21       |
| LR   | 4185   | 41.85   | 41.85   | 392.16 | 151.36     | 9.13   | 6.87       |
